# Supplementary material for: Mechanisms That Determine the Internal Environment of the Developing Brain: A Transcriptomic, Functional and Ultrastructural Approach
Source: PLoS One. 2013 Jul 2;8(7):e65629. doi: 10.1371/journal.pone.0065629 (PMC3699566; doi:10.1371/journal.pone.0065629)
Supplement: Table S2 — Full normalised dataset. A dataset containing all normalised data with differential expression between embryo (E15) and adult. (XLSX) [file pone.0065629.s002.xlsx]

## Sheet: Table S2_full dataset
GeneID	logConc	log2FC	P.Value	adj.P.Val	FC	GeneName	Gene Description	Direction
ENSRNOG00000000001	-35.9502	28.1318	0.0008332	0.00291018	2.94115e+08	Arsj	arylsulfatase J [Source:RefSeq peptide;Acc:NP_001041352]	E
ENSRNOG00000000007	-19.685	-2.02292	4.67e-09	2.93e-08	-4.06405	Gad1	Glutamate decarboxylase 1 [Source:UniProtKB/Swiss-Prot;Acc:P18088]	A
ENSRNOG00000000008	-20.0223	6.6272	3.08e-51	1.44e-49	98.8524	Alx4	homeobox protein aristaless-like 4 [Source:RefSeq peptide;Acc:NP_001100023]	E
ENSRNOG00000000010	-18.189	5.81228	7.64e-69	7.22e-67	56.1914	Cbln1	Cerebellin-1Cerebellin[des-Ser1]-cerebellin [Source:UniProtKB/Swiss-Prot;Acc:P63182]	E
ENSRNOG00000000012	-23.4409	3.78288	0.000442458	0.00161446	13.7645	Tcf15	transcription factor 15 [Source:RefSeq peptide;Acc:NP_001162051]	E
ENSRNOG00000000017	-12.8001	-2.86867	9.15e-35	2.28e-33	-7.30391	Steap1	metalloreductase STEAP1 [Source:RefSeq peptide;Acc:NP_001100099]	A
ENSRNOG00000000021	-17.7512	0.693862	0.00717953	0.0215327	1.61761	Fbxl14	RCG29594Uncharacterized protein [Source:UniProtKB/TrEMBL;Acc:D3ZE42]	E
ENSRNOG00000000024	-16.8789	0.767021	0.00149816	0.00503297	1.70175	B4F7C7_RAT	heme-binding protein 1 [Source:RefSeq peptide;Acc:NP_001102121]	E
ENSRNOG00000000028	-14.9163	0.619506	0.00557436	0.0170269	1.53635	Nde1	Nuclear distribution protein nudE homolog 1 [Source:UniProtKB/Swiss-Prot;Acc:Q9ES39]	E
ENSRNOG00000000029	-14.9578	-2.17939	4.05e-21	5.47e-20	-4.52963	MYH11_RAT	Myosin-11 [Source:UniProtKB/Swiss-Prot;Acc:Q63862]	A
ENSRNOG00000000033	-14.9709	2.68588	1.02e-29	2.03e-28	6.43473	Tmcc2	Similar to RIKEN cDNA 1110063G11 (Predicted)Uncharacterized protein [Source:UniProtKB/TrEMBL;Acc:D3ZE26]	E
ENSRNOG00000000036	-22.4414	3.78	7.46e-07	3.81e-06	13.737	Klhdc8a	kelch domain containing 8A [Source:RefSeq peptide;Acc:NP_001094153]	E
ENSRNOG00000000040	-16.3849	-2.3121	6.89e-22	9.64e-21	-4.96606	RGD1304622	Uncharacterized protein [Source:UniProtKB/TrEMBL;Acc:D4A5N3]	A
ENSRNOG00000000042	-13.1741	-1.1223	3.6e-07	1.9e-06	-2.17693	Xpr1	xenotropic and polytropic retrovirus receptor 1 [Source:RefSeq peptide;Acc:NP_001099462]	A
ENSRNOG00000000044	-15.0208	-0.803493	0.000325584	0.00121324	-1.74532	Tmem175	Transmembrane protein 175 [Source:UniProtKB/Swiss-Prot;Acc:Q6AY05]	A
ENSRNOG00000000045	-23.1104	2.44783	0.0106828	0.0309837	5.45594	Cd244	Natural killer cell receptor 2B4 [Source:UniProtKB/Swiss-Prot;Acc:Q9JLM2]	E
ENSRNOG00000000047	-12.5733	-1.60395	5.86e-13	4.93e-12	-3.03974	Cd82	CD82 antigen [Source:UniProtKB/Swiss-Prot;Acc:O70352]	A
ENSRNOG00000000054	-13.5233	-1.38209	5.01e-10	3.41e-09	-2.60645	Abhd8	abhydrolase domain-containing protein 8 [Source:RefSeq peptide;Acc:NP_001100771]	A
ENSRNOG00000000060	-20.1095	-1.62267	1.21e-05	5.45e-05	-3.07945	Cplx1	Complexin-1 [Source:UniProtKB/Swiss-Prot;Acc:P63041]	A
ENSRNOG00000000064	-12.3936	-2.3347	1.33e-24	2.13e-23	-5.04446	Atp5i	ATP synthase subunit e, mitochondrial [Source:UniProtKB/Swiss-Prot;Acc:P29419]	A
ENSRNOG00000000070	-12.8461	-0.758365	0.00053044	0.00191159	-1.69157	Dr1	Protein Dr1 [Source:UniProtKB/Swiss-Prot;Acc:Q5XI68]	A
ENSRNOG00000000073	-14.581	-0.674835	0.00233097	0.00760708	-1.59641	TMED5_RAT	Transmembrane emp24 domain-containing protein 5 [Source:UniProtKB/Swiss-Prot;Acc:Q6AXN3]	A
ENSRNOG00000000075	-15.0689	1.26353	2.42e-08	1.43e-07	2.40083	Mtf2	metal-response element-binding transcription factor 2 [Source:RefSeq peptide;Acc:NP_001094368]	E
ENSRNOG00000000082	-13.0186	-1.3822	4.55e-10	3.11e-09	-2.60666	Hltf	helicase-like transcription factor [Source:RefSeq peptide;Acc:NP_001099948]	A
ENSRNOG00000000091	-20.2584	2.73952	4.68e-11	3.45e-10	6.6785	Smad9	Mothers against decapentaplegic homolog 9 [Source:UniProtKB/Swiss-Prot;Acc:O54835]	E
ENSRNOG00000000098	-14.3168	-0.931625	2.65e-05	0.000114207	-1.90742	Zfp364	RING finger protein 115 [Source:RefSeq peptide;Acc:NP_001102030]	A
ENSRNOG00000000104	-14.4973	1.41073	3.75e-10	2.58e-09	2.65871	Thoc3	THO complex subunit 3 [Source:RefSeq peptide;Acc:NP_001099529]	E
ENSRNOG00000000108	-13.0914	-1.8215	4.99e-16	5.08e-15	-3.53449	Aga	N(4)-(Beta-N-acetylglucosaminyl)-L-asparaginaseGlycosylasparaginase alpha chainGlycosylasparaginase beta chain [Source:UniProtKB/Swiss-Prot;Acc:P30919]	A
ENSRNOG00000000111	-15.7061	-1.43405	4.23e-10	2.9e-09	-2.70204	RGD1565675	cooperator of PRMT5 [Source:RefSeq peptide;Acc:NP_001162592]	A
ENSRNOG00000000113	-16.3254	-0.693961	0.00270686	0.00870939	-1.61772	Elac1	zinc phosphodiesterase ELAC protein 1 [Source:RefSeq peptide;Acc:NP_001100876]	A
ENSRNOG00000000117	-20.1888	3.94795	4.66e-21	6.25e-20	15.433	D3ZB88_RAT	Uncharacterized protein [Source:UniProtKB/TrEMBL;Acc:D3ZB88]	E
ENSRNOG00000000120	-14.7604	-1.26068	2.03e-08	1.21e-07	-2.39609	Tceb1	Transcription elongation factor B polypeptide 1 [Source:UniProtKB/Swiss-Prot;Acc:P83941]	A
ENSRNOG00000000122	-15.6135	2.14955	8.26e-20	1.04e-18	4.4369	KAD2_RAT	Adenylate kinase 2, mitochondrial [Source:UniProtKB/Swiss-Prot;Acc:P29410]	E
ENSRNOG00000000127	-14.895	-0.55438	0.0127265	0.0364627	-1.46854	Kpna6	karyopherin (importin) alpha 6 Gene [Source:MGI Symbol;Acc:MGI:1100836]	A
ENSRNOG00000000130	-15.7863	0.649241	0.00442358	0.0137978	1.56834	Dnajb5	dnaJ homolog subfamily B member 5 [Source:RefSeq peptide;Acc:NP_001101474]	E
ENSRNOG00000000133	-12.7442	-1.03825	2.3e-06	1.12e-05	-2.05374	Txndc15	Thioredoxin domain-containing protein 15 [Source:UniProtKB/Swiss-Prot;Acc:Q5BJT4]	A
ENSRNOG00000000138	-19.2286	-2.75588	2.74e-18	3.19e-17	-6.75466	D4A5Q8_RAT	GLIS family zinc finger 1 (Predicted), isoform CRA_bUncharacterized protein [Source:UniProtKB/TrEMBL;Acc:D4A5Q8]	A
ENSRNOG00000000142	-13.4994	0.676987	0.00205197	0.00675337	1.5988	Plxdc2	plexin domain-containing protein 2 [Source:RefSeq peptide;Acc:NP_001101892]	E
ENSRNOG00000000146	-15.0404	-0.983931	1.13e-05	5.1e-05	-1.97785	Nebl	Uncharacterized protein [Source:UniProtKB/TrEMBL;Acc:D4A164]	A
ENSRNOG00000000147	-13.527	0.895895	4.82e-05	0.00020083	1.86076	Mast2	microtubule-associated serine/threonine-protein kinase 2 [Source:RefSeq peptide;Acc:NP_001101475]	E
ENSRNOG00000000150	-14.717	-1.82333	1.15e-15	1.15e-14	-3.53898	LOC100364233		A
ENSRNOG00000000156	-16.0754	2.00711	3.62e-17	3.96e-16	4.01975	Megf6	Multiple epidermal growth factor-like domains protein 6 [Source:UniProtKB/Swiss-Prot;Acc:O88281]	E
ENSRNOG00000000158	-16.8094	0.974733	5.08e-05	0.000211046	1.96528	Cdo1	Cysteine dioxygenase type 1 [Source:UniProtKB/Swiss-Prot;Acc:P21816]	E
ENSRNOG00000000161	-13.4252	-0.690067	0.001653	0.00551742	-1.61336	Chm	Rab proteins geranylgeranyltransferase component A 1 [Source:UniProtKB/Swiss-Prot;Acc:P37727]	A
ENSRNOG00000000164	-11.0569	-2.10219	1.16e-20	1.53e-19	-4.2936	Lamp2	Lysosome-associated membrane glycoprotein 2 [Source:UniProtKB/Swiss-Prot;Acc:P17046]	A
ENSRNOG00000000165	-22.0615	6.54387	6.3e-22	8.84e-21	93.3043	Pfkfb1	6-phosphofructo-2-kinase/fructose-2,6-biphosphatase 16-phosphofructo-2-kinaseFructose-2,6-bisphosphatase [Source:UniProtKB/Swiss-Prot;Acc:P07953]	E
ENSRNOG00000000167	-16.1493	3.98003	1.91e-52	9.4e-51	15.7801	Alas2	aminolevulinic acid synthase 1 Gene [Source:MGI Symbol;Acc:MGI:87989]	E
ENSRNOG00000000168	-18.8173	2.45957	1.48e-15	1.47e-14	5.50055	Gatm	Glycine amidinotransferase, mitochondrial [Source:UniProtKB/Swiss-Prot;Acc:P50442]	E
ENSRNOG00000000169	-17.9892	1.58021	4.22e-09	2.66e-08	2.99013	Spata5l1	similar to spermatogenesis associated 5-like 1 (LOC691729), mRNA [Source:RefSeq DNA;Acc:NM_001109647]	E
ENSRNOG00000000170	-12.4743	-2.16446	1.3e-21	1.79e-20	-4.483	Slc30a4	Zinc transporter 4 [Source:UniProtKB/Swiss-Prot;Acc:O55174]	A
ENSRNOG00000000172	-16.7139	-5.86104	1.52e-91	3.83e-89	-58.1231	Sqrdl	sulfide quinone reductase-like [Source:RefSeq peptide;Acc:NP_001041378]	A
ENSRNOG00000000175	-16.2148	1.4431	9.75e-10	6.48e-09	2.71904	Mier2	mesoderm induction early response protein 2 [Source:RefSeq peptide;Acc:NP_001102207]	E
ENSRNOG00000000177	-16.6205	-3.04227	5.35e-34	1.3e-32	-8.23785	Ppap2c	Lipid phosphate phosphohydrolase 2 [Source:UniProtKB/Swiss-Prot;Acc:Q8K593]	A
ENSRNOG00000000190	-12.8629	0.681485	0.00183636	0.00608384	1.60379	Q91XT0_RAT	E1A-binding protein [Source:UniProtKB/TrEMBL;Acc:Q91XT0]	E
ENSRNOG00000000195	-13.6871	-1.35013	1.26e-09	8.33e-09	-2.54934	Vwa5a	von Willebrand factor A domain-containing protein 5A [Source:UniProtKB/Swiss-Prot;Acc:Q75WE7]	A
ENSRNOG00000000204	-14.0618	0.990219	8.05e-06	3.69e-05	1.98649	Syncrip	Heterogeneous nuclear ribonucleoprotein Q [Source:UniProtKB/Swiss-Prot;Acc:Q7TP47]	E
ENSRNOG00000000207	-15.2987	-2.06701	4.45e-19	5.4e-18	-4.19019	LOC100365314	None	A
ENSRNOG00000000216	-16.1927	1.63435	5.16e-12	4.07e-11	3.10447	Klf11	Krueppel-like factor 11 [Source:RefSeq peptide;Acc:NP_001032431]	E
ENSRNOG00000000217	-15.5922	-2.8695	6.91e-33	1.6e-31	-7.30809	LOC100365881	Glutathione S-transferase [Source:UniProtKB/TrEMBL;Acc:D3ZBD6]	A
ENSRNOG00000000219	-14.5405	-1.33218	2.74e-09	1.75e-08	-2.51783	Ano10	Uncharacterized protein [Source:UniProtKB/TrEMBL;Acc:D3ZBU6]	A
ENSRNOG00000000221	-14.9433	-1.26039	2.07e-08	1.23e-07	-2.39561	Abhd5	1-acylglycerol-3-phosphate O-acyltransferase ABHD5 [Source:UniProtKB/Swiss-Prot;Acc:Q6QA69]	A
ENSRNOG00000000237	-14.716	-1.08639	1.16e-06	5.81e-06	-2.12342	RGD1310429	similar to Protein Njmu-R1 (RGD1310429), mRNA [Source:RefSeq DNA;Acc:NM_001139506]	A
ENSRNOG00000000244	-16.3747	0.905399	0.000115195	0.000457349	1.87306	Coil	coilin [Source:RefSeq peptide;Acc:NP_059056]	E
ENSRNOG00000000245	-13.0288	-1.88702	4.94e-17	5.34e-16	-3.69871	Slc16a6	monocarboxylate transporter 7 [Source:RefSeq peptide;Acc:NP_942055]	A
ENSRNOG00000000247	-16.1981	-1.02866	8.79e-06	4.02e-05	-2.04012	D3ZEI8_RAT	Uncharacterized protein [Source:UniProtKB/TrEMBL;Acc:D3ZCX5]	A
ENSRNOG00000000248	-12.5407	1.33003	1.83e-09	1.2e-08	2.51409	Sfrs2	Serine/arginine-rich splicing factor 2 [Source:UniProtKB/Swiss-Prot;Acc:Q6PDU1]	E
ENSRNOG00000000249	-15.7944	-0.889421	9.31e-05	0.00037476	-1.85243	RGD1306284	UPF0563 protein C17orf95 homolog [Source:UniProtKB/Swiss-Prot;Acc:Q5RJL2]	A
ENSRNOG00000000254	-34.7576	30.5169	4.01e-16	4.11e-15	1.53636e+09	None		E
ENSRNOG00000000257	-16.7529	1.00482	2.73e-05	0.00011757	2.0067	Smpd3	Sphingomyelin phosphodiesterase 3 [Source:UniProtKB/Swiss-Prot;Acc:O35049]	E
ENSRNOG00000000258	-15.1779	1.1091	9.56e-07	4.83e-06	2.15711	Prmt7	Protein arginine N-methyltransferase 7 [Source:UniProtKB/Swiss-Prot;Acc:Q5U4E8]	E
ENSRNOG00000000262	-15.6254	1.4777	1.6e-10	1.13e-09	2.78504	D3ZEI3_RAT	Uncharacterized protein [Source:UniProtKB/TrEMBL;Acc:D3ZEI3]	E
ENSRNOG00000000275	-18.6428	3.30262	2.81e-26	4.89e-25	9.86703	D3ZD52_RAT	Uncharacterized protein [Source:UniProtKB/TrEMBL;Acc:D3ZD52]	E
ENSRNOG00000000277	-18.2454	2.418	2.4e-17	2.66e-16	5.3443	Tet1	tet oncogene 1 [Source:RefSeq peptide;Acc:NP_001101113]	E
ENSRNOG00000000279	-15.2559	-1.42501	3.42e-10	2.36e-09	-2.68516	Rtn4ip1	reticulon 4 interacting protein 1 [Source:RefSeq peptide;Acc:NP_001101114]	A
ENSRNOG00000000281	-13.7531	-1.58376	1.46e-12	1.19e-11	-2.99749	Prodh	proline dehydrogenase, mitochondrial [Source:RefSeq peptide;Acc:NP_001129250]	A
ENSRNOG00000000283	-16.0208	1.25361	7.4e-08	4.16e-07	2.38437	Dgcr14	protein DGCR14 [Source:RefSeq peptide;Acc:NP_001012490]	E
ENSRNOG00000000288	-15.3101	0.983465	1.37e-05	6.12e-05	1.97721	Scarf2	scavenger receptor class F member 2 [Source:RefSeq peptide;Acc:NP_001099334]	E
ENSRNOG00000000299	-15.8997	1.73292	1.62e-13	1.41e-12	3.32401	Foxo3	forkhead box protein O3 [Source:RefSeq peptide;Acc:NP_001099865]	E
ENSRNOG00000000302	-14.0609	-1.07034	1.38e-06	6.85e-06	-2.09993	Sesn1	sestrin-1 [Source:RefSeq peptide;Acc:NP_001099866]	A
ENSRNOG00000000303	-17.08	0.981911	5.62e-05	0.000232058	1.97508	RGD1311358	Cep57-related protein [Source:UniProtKB/Swiss-Prot;Acc:Q6AXZ4]	E
ENSRNOG00000000304	-10.862	-1.78865	1.1e-15	1.1e-14	-3.45491	Cd164	Sialomucin core protein 24 [Source:UniProtKB/Swiss-Prot;Acc:Q9QX82]	A
ENSRNOG00000000306	-15.412	-0.558164	0.0129824	0.0371488	-1.47239	Smpd2	Sphingomyelin phosphodiesterase 2 [Source:UniProtKB/Swiss-Prot;Acc:Q9ET64]	A
ENSRNOG00000000307	-17.1035	2.74973	3.08e-26	5.35e-25	6.72591	Mical1	NEDD9-interacting protein with calponin homology and LIM domains [Source:RefSeq peptide;Acc:NP_001099867]	E
ENSRNOG00000000312	-13.0688	-0.975401	9.08e-06	4.14e-05	-1.96619	Fig4	polyphosphoinositide phosphatase [Source:RefSeq peptide;Acc:NP_001040561]	A
ENSRNOG00000000314	-11.4914	-1.79547	9.19e-16	9.23e-15	-3.47128	Sec63	translocation protein SEC63 homolog [Source:RefSeq peptide;Acc:NP_001101107]	A
ENSRNOG00000000321	-14.0571	2.05358	2.48e-19	3.06e-18	4.15135	Cd24	Signal transducer CD24 [Source:UniProtKB/Swiss-Prot;Acc:Q07490]	E
ENSRNOG00000000322	-14.4548	-0.815652	0.000233268	0.000886263	-1.76009	Atg5	Autophagy protein 5 [Source:UniProtKB/Swiss-Prot;Acc:Q3MQ06]	A
ENSRNOG00000000323	-18.5796	2.10868	7.9e-13	6.6e-12	4.31297	Prdm1	PR domain zinc finger protein 1 [Source:RefSeq peptide;Acc:NP_001101109]	E
ENSRNOG00000000325	-13.7627	1.42435	1.81e-10	1.28e-09	2.68394	Prep	Prolyl endopeptidase [Source:UniProtKB/Swiss-Prot;Acc:O70196]	E
ENSRNOG00000000335	-33.7221	32.588	4.51e-43	1.56e-41	6.45584e+09	D3Z9R6_RAT	erythroid membrane-associated protein [Source:RefSeq peptide;Acc:NP_001178691]	E
ENSRNOG00000000368	-17.6911	1.52398	5.01e-09	3.14e-08	2.87583	GRIK2_RAT	Glutamate receptor, ionotropic kainate 2 [Source:UniProtKB/Swiss-Prot;Acc:P42260]	E
ENSRNOG00000000373	-23.0679	4.52821	2.87e-06	1.38e-05	23.0742	LOC100362857		E
ENSRNOG00000000379	-15.7444	-1.17357	2.77e-07	1.48e-06	-2.2557	Dnajc12	DnaJ homolog subfamily C member 12 [Source:UniProtKB/Swiss-Prot;Acc:Q925T0]	A
ENSRNOG00000000383	-23.6459	3.37505	0.00592367	0.0179969	10.375	Mypn	myopalladin [Source:RefSeq peptide;Acc:NP_001101098]	E
ENSRNOG00000000386	-21.4504	-1.74464	0.00140817	0.00475503	-3.35112	Pbld	Phenazine biosynthesis-like domain-containing protein [Source:UniProtKB/Swiss-Prot;Acc:Q68G31]	A
ENSRNOG00000000387	-13.9221	-1.92132	2.15e-17	2.39e-16	-3.78769	Slc25a16	Graves disease carrier protein [Source:UniProtKB/Swiss-Prot;Acc:P16261]	A
ENSRNOG00000000389	-17.4402	2.41724	4.11e-20	5.28e-19	5.34146	Dna2	Uncharacterized protein [Source:UniProtKB/TrEMBL;Acc:D3ZG52]	E
ENSRNOG00000000394	-17.1741	-0.91486	0.000164821	0.000640323	-1.88539	Srgn	Serglycin [Source:UniProtKB/Swiss-Prot;Acc:P04917]	A
ENSRNOG00000000395	-12.431	-1.68496	4.25e-14	3.85e-13	-3.21531	LOC606294	KIF1-binding protein [Source:UniProtKB/Swiss-Prot;Acc:Q4G074]	A
ENSRNOG00000000398	-15.5685	-0.844945	0.000188388	0.000726802	-1.7962	Zufsp	Zinc finger with UFM1-specific peptidase domain protein [Source:UniProtKB/Swiss-Prot;Acc:Q5U2S3]	A
ENSRNOG00000000401	-35.9466	-28.1389	0.000367404	0.001354	-2.95564e+08	Gprc6a	G-protein coupled receptor family C group 6 member A [Source:UniProtKB/Swiss-Prot;Acc:Q70VB1]	A
ENSRNOG00000000407	-17.2041	2.03912	8.71e-16	8.76e-15	4.10996	Dcbld1	RCG22100Uncharacterized protein [Source:UniProtKB/TrEMBL;Acc:D3ZFM7]	E
ENSRNOG00000000408	-14.1634	-1.16205	1.72e-07	9.37e-07	-2.23775	Gopc	golgi associated PDZ and coiled-coil motif containing [Source:RefSeq peptide;Acc:NP_001101101]	A
ENSRNOG00000000412	-16.1649	5.90478	3.63e-93	9.63e-91	59.9124	Slc35f1	solute carrier family 35 member F1 [Source:RefSeq peptide;Acc:NP_001102808]	E
ENSRNOG00000000413	-21.8741	-3.34143	1.55e-08	9.34e-08	-10.1361	Pln	Cardiac phospholamban [Source:UniProtKB/Swiss-Prot;Acc:P61016]	A
ENSRNOG00000000414	-17.7859	1.61063	1.08e-09	7.16e-09	3.05386	LOC100361627	rCG22129-like (LOC100365935), mRNA [Source:RefSeq DNA;Acc:NM_001177829]	E
ENSRNOG00000000417	-12.2196	1.02994	2.7e-06	1.31e-05	2.04194	Q4G051_RAT	Numa1 protein [Source:UniProtKB/TrEMBL;Acc:Q4G051]	E
ENSRNOG00000000418	-16.3689	2.98509	2.43e-32	5.52e-31	7.91777	Ng35	zinc finger and BTB domain containing 12 [Source:RefSeq peptide;Acc:NP_001128463]	E
ENSRNOG00000000419	-15.6898	-4.04665	4.7e-57	2.83e-55	-16.5258	Cfb	complement factor B [Source:RefSeq peptide;Acc:NP_997631]	A
ENSRNOG00000000420	-14.3116	0.941936	2.25e-05	9.77e-05	1.9211	Rdbp	RD RNA-binding protein [Source:RefSeq peptide;Acc:NP_997713]	E
ENSRNOG00000000421	-13.6555	0.566645	0.00984522	0.0287382	1.48107	Skiv2l	superkiller viralicidic activity 2-like (S. cerevisiae ) [Source:RefSeq peptide;Acc:NP_998724]	E
ENSRNOG00000000422	-16.3293	1.37113	6.95e-09	4.3e-08	2.58673	DOM3Z_RAT	Protein Dom3Z [Source:UniProtKB/Swiss-Prot;Acc:Q6MG77]	E
ENSRNOG00000000423	-17.5896	0.716698	0.00446792	0.0139184	1.64342	Stk19	serine/threonine-protein kinase 19 [Source:RefSeq peptide;Acc:NP_001013215]	E
ENSRNOG00000000428	-19.4193	-6.25585	2.97e-65	2.42e-63	-76.4187	Cyp21a1	Steroid 21-hydroxylase [Source:UniProtKB/Swiss-Prot;Acc:Q64562]	A
ENSRNOG00000000432	-15.2567	-0.95372	2.21e-05	9.63e-05	-1.93686	Fkbpl	FK506-binding protein-like [Source:UniProtKB/Swiss-Prot;Acc:Q6MG81]	A
ENSRNOG00000000436	-19.3306	1.58242	1.5e-06	7.43e-06	2.99472	Egfl8	Epidermal growth factor-like protein 8 [Source:UniProtKB/Swiss-Prot;Acc:Q6MG84]	E
ENSRNOG00000000439	-19.4303	1.4743	9.61e-06	4.36e-05	2.77849	Ager	Advanced glycosylation end product-specific receptor [Source:UniProtKB/Swiss-Prot;Acc:Q63495]	E
ENSRNOG00000000440	-13.3237	1.36424	8.38e-10	5.6e-09	2.57441	Pbx2	pre-B-cell leukemia homeobox 2 [Source:RefSeq peptide;Acc:NP_001002828]	E
ENSRNOG00000000441	-19.2311	1.35082	2.98e-05	0.000127267	2.55058	Gpsm3	G-protein-signaling modulator 3 [Source:UniProtKB/Swiss-Prot;Acc:Q6MG88]	E
ENSRNOG00000000442	-16.9925	2.37997	5.77e-21	7.71e-20	5.20526	Notch4	neurogenic locus notch homolog protein 4 [Source:RefSeq peptide;Acc:NP_001002827]	E
ENSRNOG00000000443	-19.6205	-1.26043	0.000214178	0.000818587	-2.39567	C4b	Complement C4Complement C4 beta chainComplement C4 alpha chainC4a anaphylatoxinComplement C4 gamma chain [Source:UniProtKB/Swiss-Prot;Acc:P08649]	A
ENSRNOG00000000451	-19.483	-5.88134	2.09e-55	1.16e-53	-58.9467	RT1-Ba	rano class II histocompatibility antigen, B alpha chain [Source:RefSeq peptide;Acc:NP_001008831]	A
ENSRNOG00000000455	-16.035	-5.60947	1.39e-90	3.36e-88	-48.8223	Tap2	Antigen peptide transporter 2 [Source:UniProtKB/Swiss-Prot;Acc:P36372]	A
ENSRNOG00000000456	-17.9914	-2.73106	5.71e-24	8.83e-23	-6.63943	Psmb8	Proteasome subunit beta type-8 [Source:UniProtKB/Swiss-Prot;Acc:P28064]	A
ENSRNOG00000000457	-15.9185	-3.97072	9.67e-55	5.24e-53	-15.6786	Tap1	Antigen peptide transporter 1 [Source:UniProtKB/Swiss-Prot;Acc:P36370]	A
ENSRNOG00000000459	-17.4608	-4.18345	4.72e-52	2.28e-50	-18.1696	Psmb9	Proteasome subunit beta type-9 [Source:UniProtKB/Swiss-Prot;Acc:P28077]	A
ENSRNOG00000000463	-19.0005	1.44631	2.42e-06	1.18e-05	2.7251	Col11a2	collagen alpha-2(XI) chain [Source:RefSeq peptide;Acc:NP_997693]	E
ENSRNOG00000000465	-11.9512	-0.747912	0.000607334	0.00217277	-1.67936	Slc39a7	solute carrier family 39 (zinc transporter), member 7 [Source:RefSeq peptide;Acc:NP_001008885]	A
ENSRNOG00000000470	-14.6866	1.07545	1.59e-06	7.88e-06	2.10738	Vps52	Vacuolar protein sorting-associated protein 52 homolog [Source:UniProtKB/Swiss-Prot;Acc:O55166]	E
ENSRNOG00000000471	-17.7113	0.980216	0.000144933	0.00056883	1.97276	B3galt4	Beta-1,3-galactosyltransferase 4 [Source:UniProtKB/Swiss-Prot;Acc:O88178]	E
ENSRNOG00000000474	-14.4758	1.25056	2.41e-08	1.42e-07	2.37933	Rgl2	ral guanine nucleotide dissociation stimulator-like 2 [Source:RefSeq peptide;Acc:NP_997712]	E
ENSRNOG00000000477	-14.9042	0.84439	0.000161039	0.000626702	1.79551	Daxx	Death domain-associated protein 6 [Source:UniProtKB/Swiss-Prot;Acc:Q8VIB2]	E
ENSRNOG00000000479	-17.3959	6.83831	1.25e-97	3.91e-95	114.429	KIFC1_RAT	Kinesin-like protein KIFC1 [Source:UniProtKB/Swiss-Prot;Acc:Q5XI63]	E
ENSRNOG00000000480	-15.9077	-1.19514	1.91e-07	1.04e-06	-2.28966	Phf1	PHD finger protein 1 [Source:RefSeq peptide;Acc:NP_997703]	A
ENSRNOG00000000483	-13.511	0.847279	0.000119004	0.000471776	1.7991	Syngap1	Ras GTPase-activating protein SynGAP [Source:UniProtKB/Swiss-Prot;Acc:Q9QUH6]	E
ENSRNOG00000000485	-14.6476	0.800432	0.000325484	0.00121302	1.74162	Bak1	bcl-2 homologous antagonist/killer [Source:RefSeq peptide;Acc:NP_446264]	E
ENSRNOG00000000486	-23.1486	2.36625	0.0170685	0.0477249	5.156	Ggnbp1	Gametogenetin-binding protein 1 [Source:UniProtKB/Swiss-Prot;Acc:Q5J2D6]	E
ENSRNOG00000000487	-21.5883	2.31414	5.19e-05	0.000214975	4.97309	Grm4	metabotropic glutamate receptor 4 precursor [Source:RefSeq peptide;Acc:NP_073157]	E
ENSRNOG00000000488	-16.5896	2.32842	4.83e-21	6.48e-20	5.02255	Hmga1	High mobility group protein HMG-I/HMG-Y [Source:UniProtKB/Swiss-Prot;Acc:Q8K585]	E
ENSRNOG00000000491	-20.2894	-2.39896	9.71e-10	6.46e-09	-5.27424	Spdef	SAM pointed domain-containing Ets transcription factor [Source:RefSeq peptide;Acc:NP_001103000]	A
ENSRNOG00000000495	-16.2249	1.39173	3.34e-09	2.12e-08	2.62393	RGD1307264	Uncharacterized protein [Source:UniProtKB/TrEMBL;Acc:D3ZCL2]	E
ENSRNOG00000000498	-13.7569	0.928116	2.64e-05	0.000113792	1.90279	Anks1a	ankyrin repeat and sterile alpha motif domain containing 1A [Source:RefSeq peptide;Acc:NP_001101083]	E
ENSRNOG00000000499	-34.2105	31.6112	4.53e-28	8.39e-27	3.28026e+09	Tcp11	T-complex protein 11 homolog [Source:UniProtKB/Swiss-Prot;Acc:Q5XI00]	E
ENSRNOG00000000502	-21.9161	4.83192	1.77e-13	1.54e-12	28.4809	Scube3	differentially expressed in FDCP 6 homolog [Source:RefSeq peptide;Acc:NP_001178646]	E
ENSRNOG00000000505	-16.6601	0.953931	6.03e-05	0.000248067	1.93714	Rpl10a	60S ribosomal protein L10a [Source:UniProtKB/Swiss-Prot;Acc:P62907]	E
ENSRNOG00000000506	-15.6925	0.685884	0.00258432	0.00834976	1.60869	Tead3	TEA domain family member 3 [Source:RefSeq peptide;Acc:NP_001091686]	E
ENSRNOG00000000517	-15.8606	0.770178	0.00077582	0.00272819	1.70548	Kctd20		E
ENSRNOG00000000521	-13.8636	-1.27073	1.08e-08	6.55e-08	-2.41283	Cdkn1a	cyclin-dependent kinase inhibitor 1 [Source:RefSeq peptide;Acc:NP_542960]	A
ENSRNOG00000000522	-17.8707	2.02715	5.12e-14	4.62e-13	4.07599	Cpne5	copine-5 [Source:RefSeq peptide;Acc:NP_001101086]	E
ENSRNOG00000000527	-11.8295	-0.738966	0.000702461	0.00248683	-1.66898	Mtch1	mitochondrial carrier homolog 1 [Source:RefSeq peptide;Acc:NP_001094303]	A
ENSRNOG00000000529	-16.7955	2.70582	1.91e-26	3.36e-25	6.5243	Pim1	Proto-oncogene serine/threonine-protein kinase pim-1 [Source:UniProtKB/Swiss-Prot;Acc:P26794]	E
ENSRNOG00000000532	-12.3408	-0.539228	0.0133236	0.0380773	-1.45319	Ftsjd2	E3 ubiquitin-protein ligase RNF8 [Source:UniProtKB/Swiss-Prot;Acc:Q4KLN8]	A
ENSRNOG00000000536	-19.0231	7.00703	1.02e-72	1.15e-70	128.626	MDGA1_RAT	MAM domain-containing glycosylphosphatidylinositol anchor protein 1 [Source:UniProtKB/Swiss-Prot;Acc:P85171]	E
ENSRNOG00000000540	-17.0489	0.693146	0.00446603	0.0139154	1.6168	BTBD9_RAT	BTB/POZ domain-containing protein 9 [Source:UniProtKB/Swiss-Prot;Acc:Q5PQR3]	E
ENSRNOG00000000541	-12.3385	-0.762092	0.000486355	0.00176242	-1.69595	Glo1	Lactoylglutathione lyase [Source:UniProtKB/Swiss-Prot;Acc:Q6P7Q4]	A
ENSRNOG00000000542	-19.6966	2.11131	2.41e-09	1.55e-08	4.32084	Dnah8		E
ENSRNOG00000000543	-18.4518	-2.18215	5.8e-15	5.55e-14	-4.53831	Frk	Tyrosine-protein kinase FRK [Source:UniProtKB/Swiss-Prot;Acc:Q62662]	A
ENSRNOG00000000545	-19.6931	-2.89234	5.6e-17	6.05e-16	-7.42474	D3ZGL7_RAT	Uncharacterized protein [Source:UniProtKB/TrEMBL;Acc:D3ZGL7]	A
ENSRNOG00000000546	-13.9946	-2.39818	2.28e-25	3.81e-24	-5.27136	Nt5dc1	5'-nucleotidase domain-containing protein 1 [Source:RefSeq peptide;Acc:NP_001099863]	A
ENSRNOG00000000547	-14.3099	-0.593477	0.00718945	0.0215581	-1.50888	Tspyl4	testis-specific Y-encoded-like protein 4 [Source:RefSeq peptide;Acc:NP_001012075]	A
ENSRNOG00000000549	-12.5495	-1.58612	1.02e-12	8.4e-12	-3.0024	Tspyl1	testis-specific Y-encoded-like protein 1 [Source:RefSeq peptide;Acc:NP_001013051]	A
ENSRNOG00000000551	-17.5001	-1.8312	3.92e-13	3.34e-12	-3.55832	RGD1305587	similar to RIKEN cDNA 2010107G23 (RGD1305587), mRNA [Source:RefSeq DNA;Acc:NM_001127452]	A
ENSRNOG00000000552	-17.9363	3.80982	1.11e-38	3.21e-37	14.024	Col13a1	collagen alpha-1(XIII) chain [Source:RefSeq peptide;Acc:NP_001102642]	E
ENSRNOG00000000555	-14.0321	1.10303	6.89e-07	3.53e-06	2.14805	Eif4ebp2	eukaryotic translation initiation factor 4E-binding protein 2 [Source:RefSeq peptide;Acc:NP_001028241]	E
ENSRNOG00000000556	-20.7306	2.5674	1.6e-08	9.62e-08	5.92742	Nodal	nodal homolog [Source:RefSeq peptide;Acc:NP_001099864]	E
ENSRNOG00000000557	-11.7745	-0.678368	0.00185008	0.00612516	-1.60033	Sar1a	GTP-binding protein SAR1a [Source:RefSeq peptide;Acc:NP_001007740]	A
ENSRNOG00000000559	-35.9893	28.0536	0.00146951	0.00494284	2.78587e+08	Npffr1	Neuropeptide FF receptor 1 [Source:UniProtKB/Swiss-Prot;Acc:Q9EP86]	E
ENSRNOG00000000560	-16.5229	1.02456	1.53e-05	6.79e-05	2.03434	Lrrc20	leucine-rich repeat-containing protein 20 [Source:RefSeq peptide;Acc:NP_001102641]	E
ENSRNOG00000000561	-15.9794	3.64203	2.93e-46	1.13e-44	12.4842	Pald	paladin [Source:RefSeq peptide;Acc:NP_001029300]	E
ENSRNOG00000000563	-21.1128	4.4418	1.9e-17	2.12e-16	21.7328	Adamts14	A disintegrin and metalloproteinase with thrombospondin motifs 14 [Source:RefSeq peptide;Acc:NP_001101106]	E
ENSRNOG00000000566	-18.6517	-0.687682	0.0160459	0.0451739	-1.61069	Pcbd1	Pterin-4-alpha-carbinolamine dehydratase [Source:UniProtKB/Swiss-Prot;Acc:P61459]	A
ENSRNOG00000000567	-18.3072	6.25304	4.53e-74	5.59e-72	76.2697	Unc5b	Netrin receptor UNC5B [Source:UniProtKB/Swiss-Prot;Acc:O08722]	E
ENSRNOG00000000568	-17.7322	1.08043	2.82e-05	0.000121011	2.11466	Slc29a3	Equilibrative nucleoside transporter 3 [Source:UniProtKB/Swiss-Prot;Acc:Q80WK7]	E
ENSRNOG00000000571	-7.96526	-4.44932	3.77e-71	3.91e-69	-21.8464	Psap	Sulfated glycoprotein 1 [Source:UniProtKB/Swiss-Prot;Acc:P10960]	A
ENSRNOG00000000572	-20.9639	5.56457	8.87e-27	1.58e-25	47.3262	Chst3	Carbohydrate sulfotransferase 3 [Source:UniProtKB/Swiss-Prot;Acc:Q9QZL2]	E
ENSRNOG00000000573	-14.4589	-2.73716	1.7e-31	3.68e-30	-6.66756	Spock2	sparc/osteonectin, cwcv and kazal-like domains proteoglycan 2 [Source:RefSeq peptide;Acc:NP_001102003]	A
ENSRNOG00000000574	-14.3306	-1.12053	4.75e-07	2.48e-06	-2.17427	None		A
ENSRNOG00000000577	-14.3137	-0.571389	0.00960071	0.0280662	-1.48595	Ddit4	DNA damage-inducible transcript 4 protein [Source:UniProtKB/Swiss-Prot;Acc:Q8VHZ9]	A
ENSRNOG00000000579	-13.9288	4.29472	2.53e-65	2.07e-63	19.6264	Marcks	Myristoylated alanine-rich C-kinase substrate [Source:UniProtKB/Swiss-Prot;Acc:P30009]	E
ENSRNOG00000000580	-22.0215	3.44935	4.87e-07	2.54e-06	10.9234	Fam26d	Uncharacterized protein [Source:UniProtKB/TrEMBL;Acc:D3ZDN4]	E
ENSRNOG00000000582	-15.0107	-2.68482	4.6e-30	9.28e-29	-6.43002	Ddo	D-aspartate oxidase [Source:RefSeq peptide;Acc:NP_001102935]	A
ENSRNOG00000000583	-14.0929	0.659654	0.0028119	0.00903357	1.5797	Cdc2l6	cell division protein kinase 19 [Source:RefSeq peptide;Acc:NP_001101104]	E
ENSRNOG00000000585	-11.7217	-1.42594	1.13e-10	8.1e-10	-2.68689	Amd1	S-adenosylmethionine decarboxylase proenzymeS-adenosylmethionine decarboxylase alpha chainS-adenosylmethionine decarboxylase beta chain [Source:UniProtKB/Swiss-Prot;Acc:P17708]	A
ENSRNOG00000000586	-14.949	0.598725	0.00736883	0.0220623	1.51438	Gtf3c6	general transcription factor 3C polypeptide 6 [Source:RefSeq peptide;Acc:NP_001102007]	E
ENSRNOG00000000587	-15.8665	0.721853	0.00161345	0.00539199	1.6493	Bxdc1	ribosome production factor 2 homolog [Source:RefSeq peptide;Acc:NP_001099861]	E
ENSRNOG00000000588	-16.4116	6.91496	1.71e-111	9e-109	120.673	Slc16a10	Monocarboxylate transporter 10 [Source:UniProtKB/Swiss-Prot;Acc:Q91Y77]	E
ENSRNOG00000000589	-35.0327	29.9668	1.36e-11	1.04e-10	1.0493e+09	RGD1310495	Uncharacterized protein [Source:UniProtKB/TrEMBL;Acc:D3ZDM4]	E
ENSRNOG00000000593	-13.6777	1.31354	3.6e-09	2.28e-08	2.48551	Rev3l	DNA polymerase zeta catalytic subunit [Source:RefSeq peptide;Acc:NP_001077435]	E
ENSRNOG00000000595	-17.6466	-1.47158	6.11e-09	3.8e-08	-2.77326	Traf3ip2	adapter protein CIKS [Source:RefSeq peptide;Acc:NP_001037713]	A
ENSRNOG00000000596	-16.5648	4.24044	7.9e-56	4.48e-54	18.9017	Fyn	Tyrosine-protein kinase Fyn [Source:UniProtKB/Swiss-Prot;Acc:Q62844]	E
ENSRNOG00000000597	-22.9419	2.78481	0.00157979	0.00528673	6.89147	D3ZDL7_RAT	WNT1-inducible-signaling pathway protein 3 [Source:RefSeq peptide;Acc:NP_001163954]	E
ENSRNOG00000000598	-16.043	3.44887	2.9e-42	9.66e-41	10.9198	Tube1	tubulin epsilon chain [Source:RefSeq peptide;Acc:NP_001102006]	E
ENSRNOG00000000599	-15.5558	5.16408	9.91e-81	1.61e-78	35.8544	Lama4	laminin, alpha 4 Gene [Source:MGI Symbol;Acc:MGI:109321]	E
ENSRNOG00000000604	-12.7864	0.568617	0.00923204	0.0270501	1.4831	Hdac2	histone deacetylase 2 [Source:RefSeq peptide;Acc:NP_445899]	E
ENSRNOG00000000605	-21.9402	2.78926	9.13e-06	4.16e-05	6.91276	Hs3st5	heparan sulfate glucosamine 3-O-sulfotransferase 5 [Source:RefSeq peptide;Acc:NP_001099862]	E
ENSRNOG00000000606	-16.4752	2.29703	9.07e-21	1.2e-19	4.91444	Pcdh15		E
ENSRNOG00000000607	-20.2977	2.06941	5.1e-07	2.65e-06	4.19716	RGD1559903	similar to RIKEN cDNA 1700049L16 (RGD1559903), mRNA [Source:RefSeq DNA;Acc:NM_001109337]	E
ENSRNOG00000000610	-13.1954	-1.32675	2.13e-09	1.38e-08	-2.50836	Cisd1	CDGSH iron-sulfur domain-containing protein 1 [Source:UniProtKB/Swiss-Prot;Acc:B0K020]	A
ENSRNOG00000000611	-16.278	1.02497	1.19e-05	5.36e-05	2.03491	Ube2d1	Ubiquitin-conjugating enzyme E2 D1 [Source:UniProtKB/Swiss-Prot;Acc:D3ZDK2]	E
ENSRNOG00000000618	-20.6868	4.64728	1.08e-22	1.57e-21	25.0594	Mdga2	MAM domain-containing glycosylphosphatidylinositol anchor protein 2 [Source:UniProtKB/Swiss-Prot;Acc:P60756]	E
ENSRNOG00000000630	-17.1846	0.933813	0.000146917	0.000576078	1.91032	D3ZD38_RAT	Uncharacterized protein [Source:UniProtKB/TrEMBL;Acc:D3ZD38]	E
ENSRNOG00000000632	-16.8428	8.18758	2.52e-130	2.56e-127	291.547	Cdk1	Cell division protein kinase 1 [Source:UniProtKB/Swiss-Prot;Acc:P39951]	E
ENSRNOG00000000633	-16.2969	3.29928	1.55e-38	4.44e-37	9.84427	Rhobtb1	rho-related BTB domain-containing protein 1 [Source:RefSeq peptide;Acc:NP_001101092]	E
ENSRNOG00000000634	-15.3453	-1.09158	1.35e-06	6.72e-06	-2.13107	RGD1306739	similar to RIKEN cDNA 1700040L02 (RGD1306739), mRNA [Source:RefSeq DNA;Acc:NM_001134576]	A
ENSRNOG00000000636	-17.9582	3.05289	4.42e-27	7.94e-26	8.29874	Rtkn2	rhotekin-2 [Source:RefSeq peptide;Acc:NP_001101095]	E
ENSRNOG00000000638	-15.4589	-1.69122	1.83e-13	1.59e-12	-3.2293	ZN365_RAT	Protein ZNF365 [Source:UniProtKB/Swiss-Prot;Acc:Q5PQS2]	A
ENSRNOG00000000639	-17.1528	1.47505	2.94e-09	1.88e-08	2.77992	Ado	2-aminoethanethiol (cysteamine) dioxygenase [Source:RefSeq peptide;Acc:NP_001101096]	E
ENSRNOG00000000640	-21.817	1.87089	0.00142615	0.00481134	3.65759	Egr2	Early growth response protein 2 [Source:UniProtKB/Swiss-Prot;Acc:P51774]	E
ENSRNOG00000000651	-15.1689	-1.73146	3.57e-14	3.25e-13	-3.32064	M6prbp1		A
ENSRNOG00000000653	-34.2292	31.5738	1.47e-27	2.68e-26	3.19634e+09	Nr5a2	Nuclear receptor subfamily 5 group A member 2 [Source:UniProtKB/Swiss-Prot;Acc:Q9QWM1]	E
ENSRNOG00000000655	-17.761	-0.679715	0.00800519	0.0238128	-1.60182	Ptprc	Receptor-type tyrosine-protein phosphatase C [Source:UniProtKB/Swiss-Prot;Acc:P04157]	A
ENSRNOG00000000656	-14.7464	0.585246	0.00854736	0.0253056	1.50029	None		E
ENSRNOG00000000657	-12.8031	-2.24545	5.77e-23	8.48e-22	-4.74185	Nek7	NIMA-related kinase 7 [Source:RefSeq peptide;Acc:NP_001101816]	A
ENSRNOG00000000661	-15.7516	-0.746068	0.00101815	0.00351536	-1.67722	Hps4	Hermansky-Pudlak syndrome 4 homolog [Source:RefSeq peptide;Acc:NP_001100618]	A
ENSRNOG00000000662	-18.543	1.36998	1.83e-06	8.98e-06	2.58467	Srrd		E
ENSRNOG00000000691	-19.6236	7.41597	1.33e-67	1.19e-65	170.776	Foxn4	forkhead box protein N4 [Source:RefSeq peptide;Acc:NP_001099405]	E
ENSRNOG00000000692	-15.8457	0.6652	0.0036532	0.0115513	1.58579	Ung	uracil-DNA glycosylase [Source:RefSeq peptide;Acc:NP_001013142]	E
ENSRNOG00000000693	-20.5748	1.35355	0.00167982	0.00559986	2.5554	Svop	Synaptic vesicle 2-related protein [Source:UniProtKB/Swiss-Prot;Acc:Q9Z2I7]	E
ENSRNOG00000000694	-36.2201	27.592	0.00130666	0.00443409	2.02312e+08	Dao	D-amino-acid oxidase [Source:UniProtKB/Swiss-Prot;Acc:O35078]	E
ENSRNOG00000000695	-15.3857	1.03242	5.45e-06	2.55e-05	2.04545	Ssh1	slingshot homolog 1 (Drosophila) Gene [Source:MGI Symbol;Acc:MGI:2686240]	E
ENSRNOG00000000697	-14.4343	3.102	2.04e-38	5.84e-37	8.58608	Coro1c	coronin-1C [Source:RefSeq peptide;Acc:NP_001102797]	E
ENSRNOG00000000700	-17.243	1.53957	7.66e-10	5.14e-09	2.90709	Tmem119	transmembrane protein 119 [Source:RefSeq peptide;Acc:NP_001100625]	E
ENSRNOG00000000701	-14.0959	-1.06998	1.4e-06	6.93e-06	-2.09941	Iscu	iron-sulfur cluster assembly enzyme ISCU, mitochondrial [Source:RefSeq peptide;Acc:NP_001099406]	A
ENSRNOG00000000702	-14.0298	0.790771	0.000346597	0.0012865	1.73	Sart3	squamous cell carcinoma antigen recognized by T-cells 3 [Source:RefSeq peptide;Acc:NP_001100626]	E
ENSRNOG00000000703	-16.2245	-1.31419	1.57e-08	9.44e-08	-2.48663	Ficd	Adenosine monophosphate-protein transferase FICD [Source:UniProtKB/Swiss-Prot;Acc:Q6AY47]	A
ENSRNOG00000000705	-35.3491	29.334	1.51e-08	9.06e-08	6.76729e+08	D3ZAS6_RAT	Uncharacterized protein [Source:UniProtKB/TrEMBL;Acc:D3ZAS6]	E
ENSRNOG00000000711	-17.029	0.832341	0.000612434	0.00218915	1.78057	RGD1306556		E
ENSRNOG00000000723	-16.2647	-3.59141	7.64e-46	2.92e-44	-12.0538	RT1-CE5	RT1 class I, locus CE5 isoform 2 [Source:RefSeq peptide;Acc:NP_001029158]	A
ENSRNOG00000000728	-19.2617	-2.62252	1.18e-16	1.25e-15	-6.15826	Clic2	Chloride intracellular channel protein 2 [Source:UniProtKB/Swiss-Prot;Acc:Q5M883]	A
ENSRNOG00000000729	-16.0006	-0.717072	0.00171232	0.00570303	-1.64384	Tmlhe	Trimethyllysine dioxygenase, mitochondrial [Source:UniProtKB/Swiss-Prot;Acc:Q91ZW6]	A
ENSRNOG00000000741	-18.3455	-0.832351	0.00244363	0.007958	-1.78059	None	None	A
ENSRNOG00000000748	-14.9275	-0.962304	1.7e-05	7.47e-05	-1.94842	Dstnl1	None	A
ENSRNOG00000000763	-15.8952	-2.32867	8.47e-23	1.23e-21	-5.02344	RT1-M3-1	RT1 class Ib, locus M3-1 [Source:RefSeq peptide;Acc:NP_075210]	A
ENSRNOG00000000775	-16.8587	1.12588	3.08e-06	1.48e-05	2.18235	Mog	Myelin-oligodendrocyte glycoprotein [Source:UniProtKB/Swiss-Prot;Acc:Q63345]	E
ENSRNOG00000000777	-16.4381	-1.9558	2.21e-16	2.31e-15	-3.87931	RT1-S3	RT1 class Ib, locus S3 [Source:RefSeq peptide;Acc:NP_001008886]	A
ENSRNOG00000000778	-18.2662	-0.72737	0.00717427	0.0215213	-1.65562	Tcte4	t-complex testis-expressed 4 [Source:RefSeq peptide;Acc:NP_001159775]	A
ENSRNOG00000000779	-16.69	0.801161	0.000745685	0.0026288	1.7425	Znrd1	DNA-directed RNA polymerase I subunit RPA12 [Source:UniProtKB/Swiss-Prot;Acc:Q6MFY5]	E
ENSRNOG00000000781	-20.2606	1.64942	4.19e-05	0.000175772	3.13708	Rnf39	RING finger protein 39 [Source:UniProtKB/Swiss-Prot;Acc:Q920M2]	E
ENSRNOG00000000782	-19.9787	4.3601	1.59e-26	2.8e-25	20.5363	Trim10	tripartite motif-containing 10 [Source:RefSeq peptide;Acc:NP_001009176]	E
ENSRNOG00000000786	-17.2325	2.17365	2.53e-17	2.79e-16	4.51164	Rpp21	ribonuclease P protein subunit p21 [Source:RefSeq peptide;Acc:NP_001002831]	E
ENSRNOG00000000787	-20.4301	-2.76704	7.89e-12	6.16e-11	-6.80709	None		A
ENSRNOG00000000790	-24.2307	-3.80365	0.0142315	0.040429	-13.9641	None		A
ENSRNOG00000000795	-17.0718	0.732402	0.00258758	0.00835847	1.6614	RT1-N3	RT1 class Ib, locus N3 [Source:RefSeq peptide;Acc:NP_001008855]	E
ENSRNOG00000000796	-10.5969	-1.10737	4.35e-07	2.28e-06	-2.15453	D4A054_RAT	Uncharacterized protein [Source:UniProtKB/TrEMBL;Acc:D4A054]	A
ENSRNOG00000000799	-13.1295	0.616806	0.00483822	0.0149018	1.53348	Abcf1	ATP-binding cassette sub-family F member 1 [Source:UniProtKB/Swiss-Prot;Acc:Q6MG08]	E
ENSRNOG00000000800	-14.1831	-4.41044	2.74e-68	2.52e-66	-21.2655	Man1a1	mannosyl-oligosaccharide 1,2-alpha-mannosidase IA [Source:RefSeq peptide;Acc:NP_001028828]	A
ENSRNOG00000000801	-17.5681	0.866615	0.000641382	0.00228791	1.82338	Msl3l2	male-specific lethal 3-like 2 [Source:RefSeq peptide;Acc:NP_001014054]	E
ENSRNOG00000000803	-14.1014	0.978519	1.03e-05	4.66e-05	1.97044	PP1RA_RAT	Serine/threonine-protein phosphatase 1 regulatory subunit 10 [Source:UniProtKB/Swiss-Prot;Acc:O55000]	E
ENSRNOG00000000805	-13.018	2.8795	8.13e-35	2.03e-33	7.35893	Gja1	Gap junction alpha-1 protein [Source:UniProtKB/Swiss-Prot;Acc:P08050]	E
ENSRNOG00000000809	-16.1258	2.48058	2.23e-24	3.53e-23	5.58124	RGD1303066	UPF0635 protein C6orf134 homolog [Source:UniProtKB/Swiss-Prot;Acc:Q6MG11]	E
ENSRNOG00000000811	-21.6458	-2.32514	3.22e-05	0.000136722	-5.01116	Pkib	cAMP-dependent protein kinase inhibitor beta [Source:UniProtKB/Swiss-Prot;Acc:P27775]	A
ENSRNOG00000000812	-15.7566	-1.5434	2.11e-11	1.59e-10	-2.9148	RGD1302996	Uncharacterized protein C6orf136 homolog [Source:UniProtKB/Swiss-Prot;Acc:Q6MG12]	A
ENSRNOG00000000814	-16.8026	2.80203	4.07e-28	7.58e-27	6.97421	Fabp7	Fatty acid-binding protein, brain [Source:UniProtKB/Swiss-Prot;Acc:P55051]	E
ENSRNOG00000000815	-15.5323	-6.07642	4.76e-104	2.01e-101	-67.4816	Smpdl3a	Acid sphingomyelinase-like phosphodiesterase 3a [Source:UniProtKB/Swiss-Prot;Acc:Q641Z7]	A
ENSRNOG00000000816	-16.2781	2.22433	4.73e-20	6.05e-19	4.67294	RGD1309543	phostensin [Source:RefSeq peptide;Acc:NP_001119759]	E
ENSRNOG00000000818	-16.4272	1.95224	7.43e-16	7.49e-15	3.86975	Nrm	Nurim [Source:UniProtKB/Swiss-Prot;Acc:Q6MG14]	E
ENSRNOG00000000821	-10.2829	2.45065	7.37e-27	1.32e-25	5.46662	Tubb5	Tubulin beta-5 chain [Source:UniProtKB/Swiss-Prot;Acc:P69897]	E
ENSRNOG00000000823	-12.1693	-1.16733	1.12e-07	6.19e-07	-2.24596	Gcc2	GRIP and coiled-coil domain-containing protein 2 [Source:RefSeq peptide;Acc:NP_001101103]	A
ENSRNOG00000000824	-12.7211	-1.78775	1.44e-15	1.44e-14	-3.45277	Dse	dermatan-sulfate epimerase [Source:RefSeq peptide;Acc:NP_001102403]	A
ENSRNOG00000000830	-12.4666	1.47266	3.27e-11	2.44e-10	2.77532	Ddr1	Epithelial discoidin domain-containing receptor 1 [Source:UniProtKB/Swiss-Prot;Acc:Q63474]	E
ENSRNOG00000000831	-16.3029	1.13818	1.26e-06	6.3e-06	2.20103	Gtf2h4	general transcription factor II H, polypeptide 4 [Source:RefSeq peptide;Acc:NP_997666]	E
ENSRNOG00000000833	-15.753	1.49981	1.01e-10	7.26e-10	2.82806	Vars2	Valyl-tRNA synthetase, mitochondrial [Source:UniProtKB/Swiss-Prot;Acc:Q6MG21]	E
ENSRNOG00000000839	-17.1299	0.878805	0.000347491	0.00128949	1.83885	Nfkbil1	NF-kappa-B inhibitor-like protein 1 [Source:UniProtKB/Swiss-Prot;Acc:Q8R2H1]	E
ENSRNOG00000000840	-19.1774	-0.829951	0.00827975	0.02457	-1.77762	Atp6v1g2	V-type proton ATPase subunit G 2 [Source:RefSeq peptide;Acc:NP_997655]	A
ENSRNOG00000000841	-12.1979	1.36716	6.35e-10	4.29e-09	2.57962	Bat1	Spliceosome RNA helicase Bat1 [Source:UniProtKB/Swiss-Prot;Acc:Q63413]	E
ENSRNOG00000000842	-14.3808	2.14021	1.37e-20	1.81e-19	4.40828	Ddah2	N(G),N(G)-dimethylarginine dimethylaminohydrolase 2 [Source:UniProtKB/Swiss-Prot;Acc:Q6MG60]	E
ENSRNOG00000000851	-12.1596	0.848923	0.000104092	0.000416015	1.80116	Bat3	Large proline-rich protein BAT3 [Source:UniProtKB/Swiss-Prot;Acc:Q6MG49]	E
ENSRNOG00000000852	-11.0728	1.22696	2.41e-08	1.42e-07	2.34074	Bat2	Large proline-rich protein BAT2 [Source:UniProtKB/Swiss-Prot;Acc:Q6MG48]	E
ENSRNOG00000000855	-22.3055	2.05798	0.00458275	0.014237	4.16402	Lst1	leukocyte specific transcript 1 [Source:RefSeq peptide;Acc:NP_072156]	E
ENSRNOG00000000857	-34.5755	30.8811	7.09e-20	8.98e-19	1.97761e+09	Msh5	MutS protein homolog 5 [Source:UniProtKB/Swiss-Prot;Acc:Q6MG62]	E
ENSRNOG00000000858	-21.9423	3.61562	1.57e-08	9.45e-08	12.2577	Ng23	Ng23 protein [Source:RefSeq peptide;Acc:NP_001004069]	E
ENSRNOG00000000860	-22.9231	4.81845	1.01e-07	5.64e-07	28.2162	G7c	Protein G7c [Source:UniProtKB/Swiss-Prot;Acc:Q6MG64]	E
ENSRNOG00000000861	-15.8835	1.78277	3.4e-14	3.11e-13	3.44087	Zic3	Zic family member 3 (odd-paired homolog, Drosophila) [Source:RefSeq peptide;Acc:NP_001102489]	E
ENSRNOG00000000866	-13.7484	1.40052	3.5e-10	2.42e-09	2.63997	Rbmx	heterogeneous nuclear ribonucleoprotein G [Source:RefSeq peptide;Acc:NP_001020834]	E
ENSRNOG00000000867	-13.7666	1.49886	2.15e-11	1.63e-10	2.8262	Vars	Valyl-tRNA synthetase [Source:UniProtKB/Swiss-Prot;Acc:Q04462]	E
ENSRNOG00000000875	-12.6279	0.90408	3.73e-05	0.00015745	1.87135	Fhl1	Four and a half LIM domains protein 1 [Source:UniProtKB/Swiss-Prot;Acc:Q9WUH4]	E
ENSRNOG00000000878	-14.931	-0.680768	0.00223407	0.00731352	-1.60299	Slc44a4	Choline transporter-like protein 4 [Source:UniProtKB/Swiss-Prot;Acc:Q6MG71]	A
ENSRNOG00000000879	-14.5771	-1.33964	2.33e-09	1.5e-08	-2.53089	Slc9a6	Sodium/hydrogen exchanger [Source:UniProtKB/TrEMBL;Acc:D3ZJ86]	A
ENSRNOG00000000881	-16.829	-0.688267	0.0038364	0.0120852	-1.61135	Mmgt1	Membrane magnesium transporter 1 [Source:UniProtKB/Swiss-Prot;Acc:B5DF51]	A
ENSRNOG00000000885	-17.6762	3.96918	2.75e-43	9.54e-42	15.6618	LOC100362819		E
ENSRNOG00000000888	-13.6284	-0.98702	7.62e-06	3.51e-05	-1.98209	Sbds	Ribosome maturation protein SBDS [Source:UniProtKB/Swiss-Prot;Acc:Q5RK30]	A
ENSRNOG00000000893	-13.1415	-1.35456	9.91e-10	6.58e-09	-2.55719	MGC94190	UPF0458 protein C7orf42 homolog [Source:UniProtKB/Swiss-Prot;Acc:Q6AY76]	A
ENSRNOG00000000894	-17.649	1.30477	3.82e-07	2.01e-06	2.47045	Fry	furry homolog [Source:RefSeq peptide;Acc:NP_001163869]	E
ENSRNOG00000000895	-14.8655	-1.07755	1.48e-06	7.32e-06	-2.11044	Rabgef1	rab5 GDP/GTP exchange factor [Source:RefSeq peptide;Acc:NP_001101803]	A
ENSRNOG00000000899	-16.5054	1.18336	6.28e-07	3.23e-06	2.27105	B3galtl	beta 1,3-galactosyltransferase-like Gene [Source:MGI Symbol;Acc:MGI:2685903]	E
ENSRNOG00000000902	-11.2591	-1.55286	2.49e-12	2.01e-11	-2.93397	Hsph1	Heat shock protein 105 kDa [Source:UniProtKB/Swiss-Prot;Acc:Q66HA8]	A
ENSRNOG00000000904	-36.49	27.0521	0.0175039	0.0485142	1.39156e+08	D3ZTT3_RAT	Uncharacterized protein [Source:UniProtKB/TrEMBL;Acc:D3ZTT3]	E
ENSRNOG00000000905	-17.1716	1.88324	8.3e-14	7.4e-13	3.68903	RGD1560846	Putative uncharacterized protein RGD1560846_predictedUncharacterized protein [Source:UniProtKB/TrEMBL;Acc:D4A8B5]	E
ENSRNOG00000000906	-19.3817	3.89742	1.01e-27	1.84e-26	14.9019	RGD1307396	Uncharacterized protein [Source:UniProtKB/TrEMBL;Acc:D3ZTT1]	E
ENSRNOG00000000916	-15.7856	0.937989	4.23e-05	0.000177419	1.91586	Katnal1	Katanin p60 ATPase-containing subunit A-like 1 [Source:UniProtKB/Swiss-Prot;Acc:Q5XIK7]	E
ENSRNOG00000000917	-18.4221	1.17761	3.06e-05	0.000130454	2.26202	RGD1560258	similar to RIKEN cDNA 4930579G22 (RGD1560258), mRNA [Source:RefSeq DNA;Acc:NM_001134570]	E
ENSRNOG00000000918	-15.5813	0.622363	0.00596896	0.0181233	1.53939	Scand3	zinc finger BED domain-containing protein 5 [Source:RefSeq peptide;Acc:NP_001099394]	E
ENSRNOG00000000921	-12.5932	-1.57807	1.32e-12	1.08e-11	-2.9857	Ubl3	Ubiquitin-like protein 3 [Source:UniProtKB/Swiss-Prot;Acc:Q5BJT2]	A
ENSRNOG00000000922	-14.0263	-1.07214	1.31e-06	6.53e-06	-2.10256	D4A7Z7_RAT	Uncharacterized protein [Source:UniProtKB/TrEMBL;Acc:D3ZTR4]	A
ENSRNOG00000000923	-13.929	0.62278	0.00468309	0.0145197	1.53984	Cct6a	T-complex protein 1 subunit zeta [Source:RefSeq peptide;Acc:NP_001028856]	E
ENSRNOG00000000924	-13.7095	3.99018	1.72e-58	1.11e-56	15.8915	Slc7a1	High affinity cationic amino acid transporter 1 [Source:UniProtKB/Swiss-Prot;Acc:P30823]	E
ENSRNOG00000000925	-15.8693	-0.739096	0.00118512	0.0040666	-1.66913	Psph	Phosphoserine phosphatase [Source:UniProtKB/Swiss-Prot;Acc:Q5M819]	A
ENSRNOG00000000926	-14.5371	-0.808932	0.000268865	0.00101134	-1.75191	Mrps17	28S ribosomal protein S17, mitochondrial [Source:RefSeq peptide;Acc:NP_001099393]	A
ENSRNOG00000000931	-14.9096	1.16743	2.23e-07	1.2e-06	2.24611	D3ZTQ1_RAT	Splicing factor, arginine/serine-rich 8 (Suppressor-of-white-apricot homolog, Drosophila), isoform CRA_bUncharacterized protein [Source:UniProtKB/TrEMBL;Acc:D3ZTQ1]	E
ENSRNOG00000000936	-16.3259	0.785999	0.000772711	0.00271791	1.72429	Stx2	Syntaxin-2 [Source:UniProtKB/Swiss-Prot;Acc:P50279]	E
ENSRNOG00000000937	-16.6939	-1.70287	1.18e-12	9.71e-12	-3.25549	Slc46a3	Solute carrier family 46 member 3 [Source:UniProtKB/Swiss-Prot;Acc:Q5BK75]	A
ENSRNOG00000000938	-11.9326	1.03239	2.52e-06	1.22e-05	2.04542	Ran	GTP-binding nuclear protein Ran [Source:UniProtKB/Swiss-Prot;Acc:P62828]	E
ENSRNOG00000000940	-15.7053	2.67866	1.45e-28	2.76e-27	6.40262	Flt1	Vascular endothelial growth factor receptor 1 [Source:UniProtKB/Swiss-Prot;Acc:P53767]	E
ENSRNOG00000000943	-17.1551	-1.39779	1.09e-08	6.65e-08	-2.63497	LOC687430	Uncharacterized protein [Source:UniProtKB/TrEMBL;Acc:D3ZTP1]	A
ENSRNOG00000000949	-17.5829	-7.46794	9.7e-114	5.6e-111	-177.041	Flt3	FL cytokine receptor [Source:RefSeq peptide;Acc:NP_001094292]	A
ENSRNOG00000000955	-16.6492	1.04621	1.14e-05	5.13e-05	2.0651	Lnx2	ligand of Numb protein X 2 [Source:RefSeq peptide;Acc:NP_001101799]	E
ENSRNOG00000000956	-20.6664	1.52817	0.000554278	0.00199263	2.88419	Rasl11a	Ras-like protein family member 11A [Source:UniProtKB/Swiss-Prot;Acc:Q6IMA3]	E
ENSRNOG00000000961	-22.8832	2.89936	0.000973888	0.003372	7.46094	Glt1d1	Uncharacterized protein [Source:UniProtKB/TrEMBL;Acc:D3ZRH0]	E
ENSRNOG00000000963	-14.3813	4.79218	3.39e-76	4.69e-74	27.707	Tmem132c		E
ENSRNOG00000000967	-15.433	0.787444	0.000503423	0.00181868	1.72601	Aacs	Acetoacetyl-CoA synthetase [Source:UniProtKB/Swiss-Prot;Acc:Q9JMI1]	E
ENSRNOG00000000968	-13.9174	-2.30489	9.61e-24	1.47e-22	-4.94131	Rnf6	RING finger protein 6 [Source:RefSeq peptide;Acc:NP_001100588]	A
ENSRNOG00000000974	-15.3414	0.996869	1.09e-05	4.9e-05	1.99566	Zfp358	zinc finger protein 358 [Source:RefSeq peptide;Acc:NP_001101798]	E
ENSRNOG00000000975	-14.5383	-0.580006	0.00876345	0.0259037	-1.49486	Mcoln1	mucolipin-1 [Source:RefSeq peptide;Acc:NP_001099373]	A
ENSRNOG00000000982	-14.4289	0.528058	0.0170153	0.0476301	1.44199	Zkscan5	zinc finger protein with KRAB and SCAN domains 5 [Source:RefSeq peptide;Acc:NP_001100589]	E
ENSRNOG00000000985	-18.5872	1.131	7.31e-05	0.000298055	2.1901	CPSF4_RAT	Cleavage and polyadenylation specificity factor subunit 4 [Source:UniProtKB/Swiss-Prot;Acc:Q5FVR7]	E
ENSRNOG00000000986	-15.9726	1.55785	3.06e-11	2.29e-10	2.94415	D3ZXQ2_RAT	Uncharacterized protein [Source:UniProtKB/TrEMBL;Acc:D3ZXQ2]	E
ENSRNOG00000000988	-14.56	0.667066	0.00265968	0.00856601	1.58784	Xab2	Pre-mRNA-splicing factor SYF1 [Source:UniProtKB/Swiss-Prot;Acc:Q99PK0]	E
ENSRNOG00000000993	-17.6869	-1.08675	1.75e-05	7.7e-05	-2.12395	Pcp2	Purkinje cell protein 2 [Source:RefSeq peptide;Acc:NP_001100586]	A
ENSRNOG00000000999	-14.4445	0.611508	0.00577475	0.0176025	1.52786	Smurf1	similar to RIKEN cDNA 4930431E10 (RGD1309707), mRNA [Source:RefSeq DNA;Acc:NM_001109598]	E
ENSRNOG00000001002	-16.4977	5.38145	2.49e-79	3.83e-77	41.6849	Dnah10		E
ENSRNOG00000001006	-19.9149	2.49867	4.06e-11	3e-10	5.65164	Nptx2	Neuronal pentraxin-2 [Source:UniProtKB/Swiss-Prot;Acc:P97738]	E
ENSRNOG00000001007	-13.2249	-1.44871	7.22e-11	5.25e-10	-2.72964	Baiap2l1	Brain-specific angiogenesis inhibitor 1-associated protein 2-like protein 1 [Source:UniProtKB/Swiss-Prot;Acc:Q3KR97]	A
ENSRNOG00000001011	-19.1794	-1.45907	1.87e-06	9.18e-06	-2.74932	Fam101a	family with sequence similarity 101, member A (Fam101a), mRNA [Source:RefSeq DNA;Acc:NM_001109547]	A
ENSRNOG00000001034	-15.5418	0.987554	1.42e-05	6.33e-05	1.98282	D3ZCJ7_RAT	Uncharacterized protein [Source:UniProtKB/TrEMBL;Acc:D3ZCJ7]	E
ENSRNOG00000001035	-15.7776	1.06134	3.88e-06	1.85e-05	2.08687	Gtf2h3	General transcription factor IIH subunit 3 [Source:UniProtKB/Swiss-Prot;Acc:Q561R7]	E
ENSRNOG00000001050	-13.685	-0.629799	0.00411889	0.0129226	-1.54735	Eif2ak1	Eukaryotic translation initiation factor 2-alpha kinase 1 [Source:UniProtKB/Swiss-Prot;Acc:Q63185]	A
ENSRNOG00000001053	-10.8743	-1.06255	1.22e-06	6.13e-06	-2.08862	Tmed2	Transmembrane emp24 domain-containing protein 2 [Source:UniProtKB/Swiss-Prot;Acc:Q63524]	A
ENSRNOG00000001056	-16.4028	0.643358	0.00586322	0.0178537	1.56196	Snapc2	snRNA-activating protein complex subunit 2 [Source:UniProtKB/Swiss-Prot;Acc:Q68FX5]	E
ENSRNOG00000001057	-15.3535	4.63083	1.13e-69	1.14e-67	24.7752	Ctxn1	Cortexin-1 [Source:UniProtKB/Swiss-Prot;Acc:P41237]	E
ENSRNOG00000001059	-14.6309	1.14776	3.07e-07	1.63e-06	2.21569	Usp42	ubiquitin carboxyl-terminal hydrolase 42 [Source:RefSeq peptide;Acc:NP_001099379]	E
ENSRNOG00000001061	-14.1584	-1.28705	7.67e-09	4.73e-08	-2.44028	Rilpl2	RILP-like protein 2 [Source:UniProtKB/Swiss-Prot;Acc:Q6AYA0]	A
ENSRNOG00000001062	-17.5063	1.94529	7.2e-14	6.44e-13	3.85116	RGD1561318	Uncharacterized protein [Source:UniProtKB/TrEMBL;Acc:D3ZEB9]	E
ENSRNOG00000001065	-14.8091	0.688111	0.00202217	0.00666199	1.61117	Cyth3	Cytohesin-3 [Source:UniProtKB/Swiss-Prot;Acc:P97696]	E
ENSRNOG00000001066	-22.9398	2.78903	0.00157979	0.00528673	6.91167	D3ZFH5_RAT	Uncharacterized protein [Source:UniProtKB/TrEMBL;Acc:D3ZFH5]	E
ENSRNOG00000001070	-13.8044	1.71578	2.65e-14	2.43e-13	3.28475	Cdk2ap1	cyclin-dependent kinase 2-associated protein 1 [Source:RefSeq peptide;Acc:NP_001107223]	E
ENSRNOG00000001072	-12.3658	-1.14217	2.07e-07	1.12e-06	-2.20713	Lass4	LAG1 longevity assurance homolog 4 [Source:RefSeq peptide;Acc:NP_001100587]	A
ENSRNOG00000001074	-16.423	1.31829	2.9e-08	1.69e-07	2.4937	Mphosph9	M-phase phosphoprotein 9 [Source:RefSeq peptide;Acc:NP_001164025]	E
ENSRNOG00000001079	-14.8795	-1.08947	1.13e-06	5.68e-06	-2.12796	DGLB_RAT	Sn1-specific diacylglycerol lipase beta [Source:UniProtKB/Swiss-Prot;Acc:P0C1S9]	A
ENSRNOG00000001081	-16.4035	-0.988436	2.18e-05	9.48e-05	-1.98403	Ogfod2	2-oxoglutarate and iron-dependent oxygenase domain-containing protein 2 [Source:RefSeq peptide;Acc:NP_001099397]	A
ENSRNOG00000001082	-16.7782	-4.38914	4.09e-60	2.83e-58	-20.9539	Abcb9	ATP-binding cassette sub-family B member 9 [Source:UniProtKB/Swiss-Prot;Acc:Q9QYJ4]	A
ENSRNOG00000001083	-14.7712	0.677688	0.00234314	0.00764596	1.59957	LOC100360920	ER lumen protein retaining receptor 2 [Source:UniProtKB/Swiss-Prot;Acc:Q5U305]	E
ENSRNOG00000001088	-16.1775	2.24237	1.88e-20	2.45e-19	4.73173	Rfc3	replication factor C subunit 3 [Source:RefSeq peptide;Acc:NP_001009629]	E
ENSRNOG00000001090	-14.3555	-1.24054	2.69e-08	1.58e-07	-2.36287	Stard13	stAR-related lipid transfer protein 13 [Source:RefSeq peptide;Acc:NP_001102530]	A
ENSRNOG00000001091	-16.3724	-1.015	1.32e-05	5.88e-05	-2.02091	Hip1r	huntingtin interacting protein 1 related isoform 1 [Source:RefSeq peptide;Acc:NP_001128235]	A
ENSRNOG00000001092	-10.1401	-5.51006	1.03e-97	3.26e-95	-45.5716	Kl	KlothoKlotho peptide [Source:UniProtKB/Swiss-Prot;Acc:Q9Z2Y9]	A
ENSRNOG00000001094	-15.4208	1.08891	1.68e-06	8.29e-06	2.12713	Zfp316	zinc finger protein 316 [Source:RefSeq peptide;Acc:NP_001100591]	E
ENSRNOG00000001098	-12.3207	0.792635	0.000288418	0.00108103	1.73224	Pds5b	Sister chromatid cohesion protein PDS5 homolog B [Source:UniProtKB/Swiss-Prot;Acc:Q6TRW4]	E
ENSRNOG00000001103	-15.7911	1.64142	1.96e-12	1.6e-11	3.11972	RGD1560686		E
ENSRNOG00000001104	-16.9202	1.63765	2.85e-11	2.13e-10	3.11158	Foxk1	forkhead box K1 [Source:RefSeq peptide;Acc:NP_001032296]	E
ENSRNOG00000001110	-18.317	-0.817636	0.00228517	0.00747001	-1.76252	N4bp2l1	NEDD4-binding protein 2-like 1 [Source:RefSeq peptide;Acc:NP_001030299]	A
ENSRNOG00000001111	-15.9568	1.72078	2.46e-13	2.13e-12	3.29615	Brca2	Breast cancer type 2 susceptibility protein homolog [Source:UniProtKB/Swiss-Prot;Acc:O35923]	E
ENSRNOG00000001113	-19.6038	-2.87567	3.79e-17	4.14e-16	-7.33945	Mmd2	monocyte to macrophage differentiation-associated 2 [Source:RefSeq peptide;Acc:NP_001032294]	A
ENSRNOG00000001115	-14.1466	-4.23329	3.71e-64	2.88e-62	-18.8081	Slc29a4	equilibrative nucleoside transporter 4 [Source:RefSeq peptide;Acc:NP_001099381]	A
ENSRNOG00000001126	-14.8985	1.0408	3.6e-06	1.72e-05	2.05737	Fbxw8	F-box/WD repeat-containing protein 8 [Source:RefSeq peptide;Acc:NP_001100615]	E
ENSRNOG00000001129	-13.5278	0.608101	0.00558342	0.017051	1.52425	Fbxo21	F-box protein 21 [Source:RefSeq peptide;Acc:NP_001101808]	E
ENSRNOG00000001134	-15.9464	1.77896	4.19e-14	3.8e-13	3.43179	Rfc5	replication factor C subunit 5 [Source:RefSeq peptide;Acc:NP_001100616]	E
ENSRNOG00000001138	-16.0699	-2.00589	1.74e-17	1.94e-16	-4.01637	Taok3	Serine/threonine-protein kinase TAO3 [Source:UniProtKB/Swiss-Prot;Acc:Q53UA7]	A
ENSRNOG00000001141	-34.748	30.5361	2.66e-16	2.76e-15	1.55698e+09	Srrm4		E
ENSRNOG00000001142	-14.7856	1.18678	1.31e-07	7.22e-07	2.27643	Prkab1	5'-AMP-activated protein kinase subunit beta-1 [Source:UniProtKB/Swiss-Prot;Acc:P80386]	E
ENSRNOG00000001143	-16.9962	4.33381	1.33e-54	7.09e-53	20.1654	Cit	citron Rho-interacting kinase [Source:RefSeq peptide;Acc:NP_001025082]	E
ENSRNOG00000001145	-14.8444	0.708678	0.00148964	0.00500548	1.63431	Ccdc64	bicaudal D-related protein 1 [Source:RefSeq peptide;Acc:NP_001178596]	E
ENSRNOG00000001148	-11.806	1.46468	3.77e-11	2.79e-10	2.76003	Rplp0	60S acidic ribosomal protein P0 [Source:UniProtKB/Swiss-Prot;Acc:P19945]	E
ENSRNOG00000001151	-18.4534	-0.766911	0.00523125	0.0160377	-1.70162	Sirt4	NAD-dependent ADP-ribosyltransferase sirtuin-4 [Source:RefSeq peptide;Acc:NP_001100617]	A
ENSRNOG00000001152	-18.0967	4.58223	8.51e-50	3.83e-48	23.9545	GLP1R_RAT	Glucagon-like peptide 1 receptor [Source:UniProtKB/Swiss-Prot;Acc:P32301]	E
ENSRNOG00000001153	-20.7116	-1.67438	0.000147662	0.000578694	-3.19181	Pla2g1b	Phospholipase A2 [Source:UniProtKB/Swiss-Prot;Acc:P04055]	A
ENSRNOG00000001156	-14.3435	1.32574	3.36e-09	2.14e-08	2.50661	Msi1	RNA-binding protein Musashi homolog 1 [Source:UniProtKB/Swiss-Prot;Acc:Q8K3P4]	E
ENSRNOG00000001157	-23.0182	4.62763	1.1e-06	5.51e-06	24.7204	Umodl1	uromodulin-like 1 Gene [Source:MGI Symbol;Acc:MGI:1929785]	E
ENSRNOG00000001163	-13.4077	0.758606	0.00055289	0.00198812	1.69185	Sfrs9	Serine/arginine-rich splicing factor 9 [Source:UniProtKB/Swiss-Prot;Acc:Q5PPI1]	E
ENSRNOG00000001166	-16.8102	1.8128	1.53e-13	1.34e-12	3.51325	None		E
ENSRNOG00000001167	-20.699	-3.25368	2.84e-14	2.6e-13	-9.53798	D3ZY64_RAT	ubiquitin-associated and SH3 domain-containing protein A [Source:RefSeq peptide;Acc:NP_001101090]	A
ENSRNOG00000001169	-16.2821	-1.36854	4.54e-09	2.85e-08	-2.58209	Slc37a1	glycerol-3-phosphate transporter [Source:RefSeq peptide;Acc:NP_001011944]	A
ENSRNOG00000001170	-11.7265	-0.954554	1.29e-05	5.75e-05	-1.93798	Cox6a1	Cytochrome c oxidase subunit 6A1, mitochondrial [Source:UniProtKB/Swiss-Prot;Acc:P10818]	A
ENSRNOG00000001173	-18.2653	-2.88459	4.72e-25	7.75e-24	-7.38498	Cabp1	Calcium-binding protein 1 [Source:UniProtKB/Swiss-Prot;Acc:O88751]	A
ENSRNOG00000001174	-15.3318	-1.84664	9.96e-16	9.99e-15	-3.59662	Pde9a	high affinity cGMP-specific 3',5'-cyclic phosphodiesterase 9A [Source:RefSeq peptide;Acc:NP_612552]	A
ENSRNOG00000001175	-11.6425	-0.52344	0.0160822	0.0452546	-1.43738	Unc119b	protein unc-119 homolog B [Source:RefSeq peptide;Acc:NP_001099404]	A
ENSRNOG00000001177	-15.0644	-1.1552	2.74e-07	1.46e-06	-2.22716	Acads	Short-chain specific acyl-CoA dehydrogenase, mitochondrial [Source:UniProtKB/Swiss-Prot;Acc:P15651]	A
ENSRNOG00000001178	-14.6903	0.607782	0.00629223	0.0190264	1.52391	Sppl3	Uncharacterized protein [Source:UniProtKB/TrEMBL;Acc:D3ZY49]	E
ENSRNOG00000001181	-16.9069	0.741389	0.00216923	0.0071115	1.67178	Wdr4	WD repeat domain 4 [Source:RefSeq peptide;Acc:NP_001129139]	E
ENSRNOG00000001182	-14.3209	-0.951196	1.79e-05	7.85e-05	-1.93348	Ndufv3	NADH dehydrogenase [ubiquinone] flavoprotein 3, mitochondrial [Source:UniProtKB/Swiss-Prot;Acc:Q6PCU8]	A
ENSRNOG00000001184	-17.381	0.999183	6.46e-05	0.000264555	1.99887	Pknox1	homeobox protein PKNOX1 [Source:RefSeq peptide;Acc:NP_001013092]	E
ENSRNOG00000001189	-15.8686	0.772193	0.000766491	0.00269788	1.70786	Sik1	Serine/threonine-protein kinase SIK1 [Source:UniProtKB/Swiss-Prot;Acc:Q9R1U5]	E
ENSRNOG00000001191	-14.7929	1.03797	3.67e-06	1.75e-05	2.05333	Tchp	trichoplein keratin filament-binding protein [Source:RefSeq peptide;Acc:NP_001178595]	E
ENSRNOG00000001193	-19.4046	-0.775892	0.0165176	0.0463647	-1.71225	Hsf2bp	heat shock factor 2-binding protein [Source:RefSeq peptide;Acc:NP_001121155]	A
ENSRNOG00000001195	-13.7798	-3.1849	5.83e-41	1.85e-39	-9.09388	Trpv4	Transient receptor potential cation channel subfamily V member 4 [Source:UniProtKB/Swiss-Prot;Acc:Q9ERZ8]	A
ENSRNOG00000001197	-18.1288	-1.05306	6.57e-05	0.000268619	-2.07493	Pdxk	Pyridoxal kinase [Source:UniProtKB/Swiss-Prot;Acc:O35331]	A
ENSRNOG00000001198	-16.8115	-0.783877	0.000921172	0.0032034	-1.72175	RGD1565883	RCG21347, isoform CRA_aUncharacterized protein [Source:UniProtKB/TrEMBL;Acc:D3ZY38]	A
ENSRNOG00000001201	-13.6273	-0.767865	0.000475731	0.00172625	-1.70275	Cstb	Cystatin-B [Source:UniProtKB/Swiss-Prot;Acc:P01041]	A
ENSRNOG00000001203	-14.73	1.14476	3.47e-07	1.84e-06	2.2111	Rrp1	ribosomal RNA processing protein 1 homolog A [Source:RefSeq peptide;Acc:NP_001012073]	E
ENSRNOG00000001204	-13.9411	1.44213	1.17e-10	8.39e-10	2.71721	Ankrd13a	ankyrin repeat domain-containing protein 13A [Source:RefSeq peptide;Acc:NP_001012148]	E
ENSRNOG00000001205	-12.0588	-2.75353	1.38e-32	3.16e-31	-6.74364	Agpat3	1-acyl-sn-glycerol-3-phosphate acyltransferase gamma [Source:RefSeq peptide;Acc:NP_001099848]	A
ENSRNOG00000001210	-15.4262	0.699215	0.00198614	0.00654842	1.62362	Pwp2	PWP2 periodic tryptophan protein homolog [Source:RefSeq peptide;Acc:NP_001162124]	E
ENSRNOG00000001211	-13.9891	-0.83556	0.0001517	0.000593334	-1.78455	RGD1303003	ES1 protein homolog, mitochondrial [Source:UniProtKB/Swiss-Prot;Acc:P56571]	A
ENSRNOG00000001212	-20.8207	4.38518	2.67e-19	3.28e-18	20.8964	Dnmt3l	DNA (cytosine-5)-methyltransferase 3-like [Source:UniProtKB/Swiss-Prot;Acc:Q1LZ50]	E
ENSRNOG00000001213	-36.3455	27.3411	0.00473594	0.0146113	1.70012e+08	Aire	autoimmune regulator [Source:RefSeq peptide;Acc:NP_001099849]	E
ENSRNOG00000001214	-11.8544	1.09523	6.09e-07	3.14e-06	2.13648	Pfkl	6-phosphofructokinase, liver type [Source:UniProtKB/Swiss-Prot;Acc:P30835]	E
ENSRNOG00000001217	-34.0188	31.9946	7.71e-33	1.78e-31	4.27894e+09	Lrrc3	Leucine-rich repeat-containing protein 3 [Source:UniProtKB/Swiss-Prot;Acc:P59035]	E
ENSRNOG00000001219	-23.0012	2.66626	0.00255805	0.0082694	6.34781	RGD1563108		E
ENSRNOG00000001222	-15.8407	0.838114	0.000252021	0.000954192	1.78771	Ube2g2	ubiquitin-conjugating enzyme E2 G2 [Source:RefSeq peptide;Acc:NP_001099850]	E
ENSRNOG00000001223	-11.5811	-1.24326	1.61e-08	9.65e-08	-2.36733	Pttg1ip	Pituitary tumor-transforming gene 1 protein-interacting protein [Source:UniProtKB/Swiss-Prot;Acc:Q6P767]	A
ENSRNOG00000001224	-18.4156	-1.54496	1.85e-08	1.1e-07	-2.91796	Itgb2	integrin beta 2 [Source:RefSeq peptide;Acc:NP_001032869]	A
ENSRNOG00000001225	-15.711	0.81398	0.000351628	0.00130386	1.75805	RGD1311257	similar to C21orf70 protein (RGD1311257), mRNA [Source:RefSeq DNA;Acc:NM_001008307]	E
ENSRNOG00000001226	-17.2305	0.807836	0.000979214	0.00338928	1.75058	D3ZGV9_RAT	Nucleoside diphosphate kinase [Source:UniProtKB/TrEMBL;Acc:D3ZGV9]	E
ENSRNOG00000001227	-13.5357	-1.83865	3.2e-16	3.31e-15	-3.57675	Adarb1	Double-stranded RNA-specific editase 1 [Source:UniProtKB/Swiss-Prot;Acc:P51400]	A
ENSRNOG00000001229	-14.8989	6.29032	5.05e-110	2.61e-107	78.2662	Q9WUW5_RAT	collagen, type XVIII, alpha 1 [Source:RefSeq peptide;Acc:NP_445941]	E
ENSRNOG00000001232	-13.4607	-1.7779	2.49e-15	2.44e-14	-3.42926	Slc19a1	Folate transporter 1 [Source:UniProtKB/Swiss-Prot;Acc:Q62866]	A
ENSRNOG00000001235	-13.999	0.911548	3.81e-05	0.000160702	1.88106	Gna12	Guanine nucleotide-binding protein subunit alpha-12 [Source:UniProtKB/Swiss-Prot;Acc:Q63210]	E
ENSRNOG00000001236	-16.4931	0.818234	0.000516673	0.0018638	1.76325	RGD1565146	Uncharacterized protein [Source:UniProtKB/TrEMBL;Acc:D3ZSM9]	E
ENSRNOG00000001237	-13.3021	1.15402	1.8e-07	9.77e-07	2.22533	Cabin1	Calcineurin-binding protein cabin-1 [Source:UniProtKB/Swiss-Prot;Acc:O88480]	E
ENSRNOG00000001242	-14.1015	-0.971099	1.15e-05	5.17e-05	-1.96033	Gstt3	Glutathione S-transferase theta-1 [Source:UniProtKB/Swiss-Prot;Acc:Q01579]	A
ENSRNOG00000001245	-14.0351	-1.20835	5.37e-08	3.06e-07	-2.31073	Pcbp3	poly(rC)-binding protein 3 [Source:RefSeq peptide;Acc:NP_001011945]	A
ENSRNOG00000001247	-13.4449	-1.40875	2.37e-10	1.66e-09	-2.65506	Clip1	restin [Source:RefSeq peptide;Acc:NP_113933]	A
ENSRNOG00000001249	-15.8803	4.60452	7.44e-67	6.51e-65	24.3276	Col6a1	Uncharacterized protein [Source:UniProtKB/TrEMBL;Acc:D3ZUL3]	E
ENSRNOG00000001251	-20.1973	8.27169	4.7e-67	4.13e-65	309.048	Grifin	Grifin [Source:UniProtKB/Swiss-Prot;Acc:O88644]	E
ENSRNOG00000001252	-17.2221	1.22316	8.97e-07	4.55e-06	2.33458	Chst12	None	E
ENSRNOG00000001254	-13.7113	2.40024	2.32e-25	3.88e-24	5.2789	Col6a2	collagen, type VI, alpha 2 [Source:RefSeq peptide;Acc:NP_001094211]	E
ENSRNOG00000001255	-16.1437	1.12538	1.36e-06	6.79e-06	2.18159	Mlxip		E
ENSRNOG00000001256	-12.656	-0.705171	0.00124893	0.00427063	-1.63034	D4A2N8_RAT	Ataxin 2 (Predicted)Uncharacterized protein [Source:UniProtKB/TrEMBL;Acc:D4A2N8]	A
ENSRNOG00000001260	-17.51	2.04801	3.74e-15	3.63e-14	4.13534	Nudt1	7,8-dihydro-8-oxoguanine triphosphatase [Source:UniProtKB/Swiss-Prot;Acc:P53369]	E
ENSRNOG00000001261	-19.6763	1.38932	8.38e-05	0.000339226	2.61955	Ftcd	Formimidoyltransferase-cyclodeaminaseGlutamate formimidoyltransferaseFormimidoyltetrahydrofolate cyclodeaminase [Source:UniProtKB/Swiss-Prot;Acc:O88618]	E
ENSRNOG00000001265	-15.569	1.671	5.81e-13	4.89e-12	3.18436	Mad1l1	mitotic spindle assembly checkpoint protein MAD1 [Source:RefSeq peptide;Acc:NP_001102857]	E
ENSRNOG00000001271	-17.6515	3.32619	6.35e-33	1.48e-31	10.0296	Card6	caspase recruitment domain-containing protein 6 [Source:RefSeq peptide;Acc:NP_001099883]	E
ENSRNOG00000001273	-15.2856	0.913218	5.28e-05	0.000218643	1.88324	LOC100361517	RCG42703, isoform CRA_aUncharacterized protein [Source:UniProtKB/TrEMBL;Acc:D3ZIU2]	E
ENSRNOG00000001274	-13.5258	-1.43016	1.31e-10	9.35e-10	-2.69477	Vps29	Vacuolar protein sorting-associated protein 29 [Source:UniProtKB/Swiss-Prot;Acc:B2RZ78]	A
ENSRNOG00000001275	-17.2755	-1.77849	7.25e-13	6.07e-12	-3.43068	Tmem184a	Transmembrane protein 184A [Source:UniProtKB/Swiss-Prot;Acc:Q4QQS1]	A
ENSRNOG00000001283	-14.7769	0.732282	0.00102692	0.00354178	1.66126	Anapc7	anaphase-promoting complex subunit 7 [Source:RefSeq peptide;Acc:NP_001100612]	E
ENSRNOG00000001284	-35.2107	29.6108	4.2e-10	2.88e-09	8.19845e+08	Uncx	Homeobox protein unc-4 homolog [Source:UniProtKB/Swiss-Prot;Acc:P97830]	E
ENSRNOG00000001285	-10.1456	-1.15387	1.43e-07	7.84e-07	-2.22509	Atp2a2	Sarcoplasmic/endoplasmic reticulum calcium ATPase 2 [Source:UniProtKB/Swiss-Prot;Acc:P11507]	A
ENSRNOG00000001288	-14.8072	-2.01885	1.31e-18	1.55e-17	-4.0526	Gpr146	probable G-protein coupled receptor 146 [Source:RefSeq peptide;Acc:NP_001102532]	A
ENSRNOG00000001293	-15.2472	0.709246	0.0016084	0.00537636	1.63495	Cee	conserved edge expressed protein [Source:RefSeq peptide;Acc:NP_001156792]	E
ENSRNOG00000001295	-18.5107	-7.0751	2.85e-92	7.37e-90	-134.839	S100b	Protein S100-B [Source:UniProtKB/Swiss-Prot;Acc:P04631]	A
ENSRNOG00000001296	-20.4483	-1.74459	2.15e-05	9.37e-05	-3.351	P2rx7	P2X purinoceptor 7 [Source:UniProtKB/Swiss-Prot;Acc:Q64663]	A
ENSRNOG00000001297	-15.1953	0.804465	0.000350599	0.0013002	1.7465	Prmt2	protein arginine N-methyltransferase 2 [Source:RefSeq peptide;Acc:NP_001020315]	E
ENSRNOG00000001299	-14.0042	-0.64017	0.00362592	0.0114737	-1.55851	Unc84a	SUN domain-containing protein 1 [Source:RefSeq peptide;Acc:NP_001007148]	A
ENSRNOG00000001302	-18.0921	4.58053	1.8e-49	7.95e-48	23.9263	Adora2a	Adenosine receptor A2a [Source:UniProtKB/Swiss-Prot;Acc:P30543]	E
ENSRNOG00000001303	-13.3408	0.628085	0.00415665	0.0130258	1.54551	Cytsa	Cytospin-A [Source:UniProtKB/Swiss-Prot;Acc:Q2KN99]	E
ENSRNOG00000001304	-14.3243	1.36477	1.16e-09	7.66e-09	2.57536	Bcr		E
ENSRNOG00000001309	-17.7298	0.987038	0.000132624	0.000522817	1.98211	Camkk2	Calcium/calmodulin-dependent protein kinase kinase 2 [Source:UniProtKB/Swiss-Prot;Acc:O88831]	E
ENSRNOG00000001314	-17.1469	0.587294	0.0160742	0.045245	1.50243	Fam20c	dentin matrix protein 4 [Source:RefSeq peptide;Acc:NP_001012238]	E
ENSRNOG00000001323	-15.8782	1.00373	1.35e-05	6.01e-05	2.00517	Zfp157	zinc finger protein 157 [Source:RefSeq peptide;Acc:NP_001163875]	E
ENSRNOG00000001325	-19.7104	2.60261	7.42e-13	6.21e-12	6.07386	Il3ra	interleukin 3 receptor, alpha chain Gene [Source:MGI Symbol;Acc:MGI:96553]	E
ENSRNOG00000001336	-15.3909	-0.676972	0.00260912	0.00841698	-1.59878	Orai1	Calcium release-activated calcium channel protein 1 [Source:UniProtKB/Swiss-Prot;Acc:Q5M848]	A
ENSRNOG00000001337	-15.0253	0.655466	0.00339332	0.0107769	1.57512	None		E
ENSRNOG00000001341	-17.2014	0.612744	0.0123425	0.0354658	1.52916	D3ZI20_RAT	Uncharacterized protein [Source:UniProtKB/TrEMBL;Acc:D3ZI20]	E
ENSRNOG00000001342	-13.2763	1.11668	4.33e-07	2.27e-06	2.16848	Wdr66	WD repeat domain 66 Gene [Source:MGI Symbol;Acc:MGI:1918495]	E
ENSRNOG00000001343	-17.9114	2.1378	3.73e-15	3.62e-14	4.4009	D3ZI21_RAT	Uncharacterized protein [Source:UniProtKB/TrEMBL;Acc:D3ZI21]	E
ENSRNOG00000001344	-11.3182	-1.26857	8.24e-09	5.06e-08	-2.40923	ALDH2_RAT	Aldehyde dehydrogenase, mitochondrial [Source:UniProtKB/Swiss-Prot;Acc:P11884]	A
ENSRNOG00000001347	-17.9267	-1.1637	7.86e-06	3.61e-05	-2.24031	D3ZI19_RAT	Uncharacterized protein [Source:UniProtKB/TrEMBL;Acc:D3ZI19]	A
ENSRNOG00000001348	-13.2461	-0.66695	0.00231658	0.00756514	-1.58771	Erp29	Endoplasmic reticulum resident protein 29 [Source:UniProtKB/Swiss-Prot;Acc:P52555]	A
ENSRNOG00000001349	-14.6118	2.88632	6.6e-34	1.6e-32	7.39381	Mcm7	DNA replication licensing factor MCM7 [Source:RefSeq peptide;Acc:NP_001004203]	E
ENSRNOG00000001350	-15.2957	0.603753	0.00720694	0.0216084	1.51966	Naa25	N-alpha-acetyltransferase 25, NatB auxiliary subunit [Source:UniProtKB/Swiss-Prot;Acc:Q6QI44]	E
ENSRNOG00000001351	-14.4665	1.08519	1.18e-06	5.91e-06	2.12166	Trafd1	TRAF-type zinc finger domain-containing protein 1 [Source:UniProtKB/Swiss-Prot;Acc:Q99MM4]	E
ENSRNOG00000001352	-15.8054	1.08292	2.56e-06	1.24e-05	2.11832	RGD1309762	Uncharacterized protein [Source:UniProtKB/TrEMBL;Acc:D3ZRW3]	E
ENSRNOG00000001360	-22.8422	-1.93944	0.0170685	0.0477249	-3.83555	Stag3	Cohesin subunit SA-3 [Source:UniProtKB/Swiss-Prot;Acc:Q99M76]	A
ENSRNOG00000001367	-17.0844	3.46891	4.38e-38	1.23e-36	11.0725	Gpc2	Glypican-2Secreted glypican-2 [Source:UniProtKB/Swiss-Prot;Acc:P51653]	E
ENSRNOG00000001368	-22.784	-4.69642	8.96e-09	5.48e-08	-25.9276	Rph3a	Rabphilin-3A [Source:UniProtKB/Swiss-Prot;Acc:P47709]	A
ENSRNOG00000001369	-20.1636	-4.32749	8.31e-29	1.6e-27	-20.0772	Oas1a	2'-5'-oligoadenylate synthase 1 [Source:UniProtKB/Swiss-Prot;Acc:Q05961]	A
ENSRNOG00000001372	-19.9209	-3.93253	3.31e-27	5.97e-26	-15.269	Oas1b	2-5 oligoadenylate synthetase 1B [Source:RefSeq peptide;Acc:NP_653353]	A
ENSRNOG00000001375	-16.5538	-1.28923	4.56e-08	2.62e-07	-2.44398	Gal3st4	galactose-3-O-sulfotransferase 4 [Source:RefSeq peptide;Acc:NP_001102534]	A
ENSRNOG00000001376	-15.3867	-0.549881	0.0143806	0.0408248	-1.46397	LOC100362962	methyltransferase-like protein 7A [Source:RefSeq peptide;Acc:NP_001032432]	A
ENSRNOG00000001377	-14.5362	1.00978	6.08e-06	2.83e-05	2.0136	Ddx54	ATP-dependent RNA helicase DDX54 [Source:RefSeq peptide;Acc:NP_001178477]	E
ENSRNOG00000001380	-13.3391	-0.691203	0.00161187	0.00538735	-1.61463	Tpcn1	Two pore calcium channel protein 1 [Source:UniProtKB/Swiss-Prot;Acc:Q9WTN5]	A
ENSRNOG00000001383	-17.5785	1.48827	8.23e-09	5.06e-08	2.80553	Slc24a6	Sodium/potassium/calcium exchanger 6 [Source:UniProtKB/Swiss-Prot;Acc:Q6AXS0]	E
ENSRNOG00000001385	-12.9411	-1.19064	6.75e-08	3.81e-07	-2.28253	Plbd2	Putative phospholipase B-like 2 [Source:UniProtKB/Swiss-Prot;Acc:Q4QQW8]	A
ENSRNOG00000001387	-14.7976	0.655944	0.00322039	0.0102554	1.57565	Mepce	7SK snRNA methylphosphate capping enzyme [Source:RefSeq peptide;Acc:NP_001094148]	E
ENSRNOG00000001388	-19.9295	-2.07122	7.5e-09	4.63e-08	-4.20241	Sds	L-serine dehydratase/L-threonine deaminase [Source:UniProtKB/Swiss-Prot;Acc:P09367]	A
ENSRNOG00000001392	-20.0841	8.49816	2.94e-71	3.07e-69	361.577	Lhx5	LIM/homeobox protein Lhx5 [Source:UniProtKB/Swiss-Prot;Acc:P61376]	E
ENSRNOG00000001396	-15.2523	0.707268	0.00167101	0.00557427	1.63271	Mospd3	motile sperm domain-containing protein 3 [Source:RefSeq peptide;Acc:NP_001020800]	E
ENSRNOG00000001397	-16.1055	1.56356	3.12e-11	2.34e-10	2.95582	D3ZHU8_RAT	Uncharacterized protein [Source:UniProtKB/TrEMBL;Acc:D3ZHU8]	E
ENSRNOG00000001404	-14.8462	-2.11654	3.81e-20	4.9e-19	-4.33652	Agfg2	arf-GAP domain and FG repeats-containing protein 2 [Source:RefSeq peptide;Acc:NP_001100601]	A
ENSRNOG00000001407	-34.9065	30.2191	1.53e-13	1.34e-12	1.24986e+09	Tfr2	Transferrin receptor protein 2 [Source:UniProtKB/Swiss-Prot;Acc:B2GUY2]	E
ENSRNOG00000001408	-21.4249	1.82528	0.000499044	0.0018044	3.54375	Actl6b	Actin-like protein 6B [Source:UniProtKB/Swiss-Prot;Acc:P86173]	E
ENSRNOG00000001409	-12.4777	1.3759	5.16e-10	3.51e-09	2.59531	Gnb2	Guanine nucleotide-binding protein G(I)/G(S)/G(T) subunit beta-2 [Source:UniProtKB/Swiss-Prot;Acc:P54313]	E
ENSRNOG00000001410	-15.271	0.677564	0.00260701	0.00841107	1.59944	Gigyf1	PERQ amino acid-rich with GYF domain-containing protein 1 [Source:RefSeq peptide;Acc:NP_001100603]	E
ENSRNOG00000001414	-19.5785	0.885902	0.00774637	0.0230825	1.84792	Serpine1	Plasminogen activator inhibitor 1 [Source:UniProtKB/Swiss-Prot;Acc:P20961]	E
ENSRNOG00000001415	-15.4317	1.7811	1.57e-14	1.46e-13	3.43688	Ap1s1	adaptor protein complex AP-1, sigma 1 [Source:RefSeq peptide;Acc:NP_001101801]	E
ENSRNOG00000001416	-19.9744	-3.82114	1.05e-24	1.69e-23	-14.1344	Vgf	Neurosecretory protein VGFVGF(24-63)VGF(180-194)VGF(375-407) [Source:UniProtKB/Swiss-Prot;Acc:P20156]	A
ENSRNOG00000001417	-13.2822	-0.517291	0.0179581	0.0497125	-1.43126	Plod3	Procollagen-lysine,2-oxoglutarate 5-dioxygenase 3 [Source:UniProtKB/Swiss-Prot;Acc:Q5U367]	A
ENSRNOG00000001422	-20.1368	10.3911	1.41e-93	3.77e-91	1342.91	LOC685612		E
ENSRNOG00000001425	-19.3011	2.80071	6.29e-17	6.77e-16	6.96784	Sh2b2	SH2B adapter protein 2 [Source:UniProtKB/Swiss-Prot;Acc:Q9Z200]	E
ENSRNOG00000001428	-17.2489	1.0744	1.46e-05	6.5e-05	2.10584	Alkbh4	alkylated DNA repair protein alkB homolog 4 [Source:RefSeq peptide;Acc:NP_001099390]	E
ENSRNOG00000001429	-15.499	1.58036	7.48e-12	5.85e-11	2.99044	LOC304396		E
ENSRNOG00000001431	-17.5189	4.57908	4.39e-55	2.43e-53	23.9024	D3ZQH9_RAT	RCG21933, isoform CRA_aUncharacterized protein [Source:UniProtKB/TrEMBL;Acc:D3ZQH9]	E
ENSRNOG00000001432	-16.3022	1.17073	6.33e-07	3.25e-06	2.25126	Dtx2	protein deltex-2 [Source:RefSeq peptide;Acc:NP_001100627]	E
ENSRNOG00000001439	-22.734	3.20057	8.56e-05	0.000346081	9.1932	RGD1307391	Uncharacterized protein [Source:UniProtKB/TrEMBL;Acc:D3ZQH1]	E
ENSRNOG00000001440	-12.1222	-0.588286	0.00691697	0.0208088	-1.50346	Mdh2	Malate dehydrogenase, mitochondrial [Source:UniProtKB/Swiss-Prot;Acc:P04636]	A
ENSRNOG00000001443	-14.4835	0.928734	3.07e-05	0.000130739	1.9036	Rhbdd2	rhomboid domain-containing protein 2 [Source:RefSeq peptide;Acc:NP_001178756]	E
ENSRNOG00000001448	-13.9254	1.75703	7.3e-15	6.94e-14	3.38002	Hip1	huntingtin-interacting protein 1 [Source:RefSeq peptide;Acc:NP_001093945]	E
ENSRNOG00000001449	-13.2037	1.15808	1.61e-07	8.83e-07	2.2316	Pom121	Nuclear envelope pore membrane protein POM 121 [Source:UniProtKB/Swiss-Prot;Acc:P52591]	E
ENSRNOG00000001450	-16.7888	0.938093	9.12e-05	0.000367348	1.91599	Nsun5	NOL1/NOP2/Sun domain family, member 5 [Source:RefSeq peptide;Acc:NP_001178522]	E
ENSRNOG00000001452	-17.0571	-1.41802	5e-09	3.13e-08	-2.67218	Fzd9	frizzled-9 [Source:RefSeq peptide;Acc:NP_695217]	A
ENSRNOG00000001457	-15.2138	0.925997	4e-05	0.00016822	1.9	Rfc2	Replication factor C subunit 2 [Source:UniProtKB/Swiss-Prot;Acc:Q641W4]	E
ENSRNOG00000001465	-12.8721	-1.47071	3.53e-11	2.62e-10	-2.77157	Ids	Uncharacterized protein [Source:UniProtKB/TrEMBL;Acc:D3ZPY7]	A
ENSRNOG00000001469	-17.1598	3.04789	7.73e-31	1.62e-29	8.27002	Eln	Elastin [Source:UniProtKB/Swiss-Prot;Acc:Q99372]	E
ENSRNOG00000001470	-15.149	1.45299	1.85e-10	1.3e-09	2.73776	Limk1	LIM domain kinase 1 [Source:UniProtKB/Swiss-Prot;Acc:P53669]	E
ENSRNOG00000001477	-17.122	0.90908	0.00020011	0.000768305	1.87785	None	None	E
ENSRNOG00000001480	-17.747	-0.740028	0.00352241	0.0111677	-1.67021	Q2V6F3_RAT	neutrophil cytosol factor 1 [Source:RefSeq peptide;Acc:NP_446186]	A
ENSRNOG00000001488	-12.161	-1.36373	6.74e-10	4.55e-09	-2.5735	Psmb1	Proteasome subunit beta type-1 [Source:UniProtKB/Swiss-Prot;Acc:P18421]	A
ENSRNOG00000001492	-19.9151	1.31742	0.000368186	0.00135621	2.49219	NAC2_RAT	Sodium/calcium exchanger 2 [Source:UniProtKB/Swiss-Prot;Acc:P48768]	E
ENSRNOG00000001501	-15.4575	2.60456	1.41e-27	2.57e-26	6.08206	Snrpa	U1 small nuclear ribonucleoprotein A [Source:RefSeq peptide;Acc:NP_001008304]	E
ENSRNOG00000001506	-18.2294	2.02345	4.42e-13	3.75e-12	4.06554	Tmem35	Transmembrane protein 35 [Source:UniProtKB/Swiss-Prot;Acc:Q6JAM9]	E
ENSRNOG00000001510	-18.488	1.83978	1.51e-10	1.07e-09	3.57956	None	None	E
ENSRNOG00000001514	-17.7035	6.33267	1.15e-83	2.08e-81	80.5978	Cdca7	Cell division cycle-associated protein 7 [Source:UniProtKB/Swiss-Prot;Acc:Q4KM91]	E
ENSRNOG00000001515	-15.2706	-0.804949	0.0003413	0.00126843	-1.74708	RGD1561394	Uncharacterized protein [Source:UniProtKB/TrEMBL;Acc:D4AE17]	A
ENSRNOG00000001516	-16.1069	-0.959967	3.12e-05	0.000132604	-1.94527	Rapgef4	Rap guanine nucleotide exchange factor 4 [Source:UniProtKB/Swiss-Prot;Acc:Q9Z1C7]	A
ENSRNOG00000001517	-14.9271	-0.653891	0.00331052	0.010531	-1.57341	Pdk1	[Pyruvate dehydrogenase [lipoamide]] kinase isozyme 1, mitochondrial [Source:UniProtKB/Swiss-Prot;Acc:Q63065]	A
ENSRNOG00000001518	-15.394	2.85819	2.4e-32	5.45e-31	7.25105	Itga6	Integrin alpha 6 subchain [Source:UniProtKB/TrEMBL;Acc:Q924W3]	E
ENSRNOG00000001519	-34.5915	30.8492	1.5e-19	1.87e-18	1.93432e+09	Dlx2	Homeobox protein DLX-2 [Source:UniProtKB/Swiss-Prot;Acc:Q64204]	E
ENSRNOG00000001520	-19.1075	0.834454	0.00363089	0.0114869	1.78318	Dlx1	homeobox protein DLX-1 [Source:RefSeq peptide;Acc:NP_001094001]	E
ENSRNOG00000001527	-21.2659	2.13008	4.79e-05	0.000199917	4.37741	Cd80	T-lymphocyte activation antigen CD80 [Source:RefSeq peptide;Acc:NP_037058]	E
ENSRNOG00000001528	-17.0523	0.914486	0.000127196	0.00050263	1.8849	Gap43	Neuromodulin [Source:UniProtKB/Swiss-Prot;Acc:P07936]	E
ENSRNOG00000001531	-16.7463	-1.24439	1.68e-07	9.15e-07	-2.36919	Chac2	Cation transport regulator-like protein 2 [Source:UniProtKB/Swiss-Prot;Acc:Q641Z5]	A
ENSRNOG00000001544	-18.8791	3.99051	3.13e-33	7.37e-32	15.8951	Cyyr1	Cysteine and tyrosine-rich protein 1 [Source:UniProtKB/Swiss-Prot;Acc:Q5PQS5]	E
ENSRNOG00000001547	-17.9604	1.76286	5.82e-11	4.26e-10	3.3937	Agps	Alkyldihydroxyacetonephosphate synthase, peroxisomal [Source:UniProtKB/Swiss-Prot;Acc:Q9EQR2]	E
ENSRNOG00000001548	-13.2818	-1.60134	7.44e-13	6.23e-12	-3.03426	Nfe2l2	Nuclear factor erythroid 2-related factor 2 [Source:UniProtKB/Swiss-Prot;Acc:O54968]	A
ENSRNOG00000001549	-12.7156	-0.637377	0.00351158	0.0111353	-1.5555	Gabpa	GA-binding protein alpha chain [Source:RefSeq peptide;Acc:NP_001102311]	A
ENSRNOG00000001551	-12.3335	-1.74702	5.33e-15	5.12e-14	-3.35665	Atp5j	ATP synthase-coupling factor 6, mitochondrial [Source:UniProtKB/Swiss-Prot;Acc:P21571]	A
ENSRNOG00000001555	-13.822	-1.47452	3.99e-11	2.95e-10	-2.77891	Btg3	Protein BTG3 [Source:UniProtKB/Swiss-Prot;Acc:O88677]	A
ENSRNOG00000001556	-17.066	0.986686	4.84e-05	0.000201513	1.98163	LOC100360986	Uncharacterized protein [Source:UniProtKB/TrEMBL;Acc:D3ZJF4]	E
ENSRNOG00000001557	-13.9986	1.05444	2.02e-06	9.9e-06	2.07691	Cxadr	Coxsackievirus and adenovirus receptor homolog [Source:UniProtKB/Swiss-Prot;Acc:Q9R066]	E
ENSRNOG00000001560	-20.9501	-1.31847	0.00365945	0.0115698	-2.49401	None	None	A
ENSRNOG00000001571	-20.8872	4.88722	2.54e-22	3.63e-21	29.5937	Cldn8	claudin-8 [Source:RefSeq peptide;Acc:NP_001032863]	E
ENSRNOG00000001573	-12.5504	-2.80148	1.82e-33	4.33e-32	-6.97154	Usp25	ubiquitin carboxyl-terminal hydrolase 25 [Source:RefSeq peptide;Acc:NP_001100584]	A
ENSRNOG00000001575	-18.0155	5.87838	1.18e-72	1.33e-70	58.826	Grik1	Glutamate receptor, ionotropic kainate 1 [Source:UniProtKB/Swiss-Prot;Acc:P22756]	E
ENSRNOG00000001582	-15.4725	2.78699	6.92e-31	1.46e-29	6.90188	Bach1	transcription regulator protein BACH1 [Source:RefSeq peptide;Acc:NP_001100583]	E
ENSRNOG00000001584	-19.5839	1.23958	0.000354417	0.00131321	2.3613	LOC304131	TAK1-like protein [Source:RefSeq peptide;Acc:NP_001014001]	E
ENSRNOG00000001585	-15.4881	0.651671	0.00399372	0.0125433	1.57099	Nrip1	nuclear receptor interacting protein 1 [Source:RefSeq peptide;Acc:NP_001094030]	E
ENSRNOG00000001596	-11.4266	-1.38596	3.44e-10	2.37e-09	-2.61346	AT5G3_RAT	ATP synthase lipid-binding protein, mitochondrial [Source:UniProtKB/Swiss-Prot;Acc:Q71S46]	A
ENSRNOG00000001598	-13.8231	-1.14806	2.2e-07	1.18e-06	-2.21615	Usp16	Ubiquitin carboxyl-terminal hydrolase 16 [Source:UniProtKB/Swiss-Prot;Acc:Q2KJ09]	A
ENSRNOG00000001599	-16.1972	-1.17035	4.52e-07	2.37e-06	-2.25066	Rwdd2b	RWD domain-containing protein 2B [Source:RefSeq peptide;Acc:NP_001094029]	A
ENSRNOG00000001602	-12.5907	-0.619468	0.00453599	0.0141126	-1.53631	Rnf160	zinc finger protein 294 [Source:RefSeq peptide;Acc:NP_001019406]	A
ENSRNOG00000001606	-14.467	0.832491	0.000180499	0.00069847	1.78076	Adamts5	A disintegrin and metalloproteinase with thrombospondin motifs 5 [Source:RefSeq peptide;Acc:NP_942056]	E
ENSRNOG00000001607	-11.0313	1.67038	6e-14	5.39e-13	3.18299	Adamts1	A disintegrin and metalloproteinase with thrombospondin motifs 1 [Source:UniProtKB/Swiss-Prot;Acc:Q9WUQ1]	E
ENSRNOG00000001608	-15.9593	-1.12091	1.1e-06	5.54e-06	-2.17484	Fam55c	family with sequence similarity 55, member C (Fam55c), mRNA [Source:RefSeq DNA;Acc:NM_001109435]	A
ENSRNOG00000001613	-13.8325	-0.888907	5.55e-05	0.000229115	-1.85177	Zbtb11	zinc finger and BTB domain-containing protein 11 [Source:RefSeq peptide;Acc:NP_001100567]	A
ENSRNOG00000001618	-16.7572	-2.95099	5.69e-32	1.26e-30	-7.73281	Ripk4	receptor-interacting serine/threonine-protein kinase 4 [Source:RefSeq peptide;Acc:NP_001100573]	A
ENSRNOG00000001620	-15.553	0.755237	0.000870393	0.00303541	1.68791	D3ZUH8_RAT	Uncharacterized protein [Source:UniProtKB/TrEMBL;Acc:D3ZQ99]	E
ENSRNOG00000001632	-14.4284	0.55924	0.0115032	0.0332225	1.47349	D4AAI9_RAT	Bromodomain and WD repeat domain containing 1 (Predicted), isoform CRA_bUncharacterized protein [Source:UniProtKB/TrEMBL;Acc:D3ZFG0]	E
ENSRNOG00000001642	-13.4793	-0.970821	1.05e-05	4.74e-05	-1.95996	D4AAH9_RAT	TBC1 domain family, member 23 (Predicted), isoform CRA_cUncharacterized protein [Source:UniProtKB/TrEMBL;Acc:D4A0K5]	A
ENSRNOG00000001645	-17.1727	-1.47307	1.91e-09	1.24e-08	-2.77612	RGD1565927	Uncharacterized protein [Source:UniProtKB/TrEMBL;Acc:D4A900]	A
ENSRNOG00000001647	-15.6441	1.56082	1.6e-11	1.22e-10	2.95022	D4AAH4_RAT	Uncharacterized proteinV-ets erythroblastosis virus E26 oncogene homolog 2 (Avian) (Mapped), isoform CRA_c [Source:UniProtKB/TrEMBL;Acc:D4AAH4]	E
ENSRNOG00000001652	-18.0741	3.73862	1.91e-36	5.01e-35	13.3487	Erg	transcriptional regulator ERG [Source:RefSeq peptide;Acc:NP_596888]	E
ENSRNOG00000001653	-13.4344	-3.50299	5.13e-48	2.13e-46	-11.3372	St3gal6	Type 2 lactosamine alpha-2,3-sialyltransferase [Source:UniProtKB/Swiss-Prot;Acc:P61943]	A
ENSRNOG00000001656	-21.5974	2.82122	1.39e-06	6.9e-06	7.06759	Kcnj15	ATP-sensitive inward rectifier potassium channel 15 [Source:UniProtKB/Swiss-Prot;Acc:Q91ZF1]	E
ENSRNOG00000001658	-20.6224	-1.60405	0.000259324	0.000980456	-3.03995	IRK6_RAT	G protein-activated inward rectifier potassium channel 2 [Source:UniProtKB/Swiss-Prot;Acc:P48550]	A
ENSRNOG00000001679	-22.4854	-2.12715	0.00445785	0.0138933	-4.36853	Gabrr3	Gamma-aminobutyric acid receptor subunit rho-3 [Source:UniProtKB/Swiss-Prot;Acc:P50573]	A
ENSRNOG00000001684	-17.4462	1.92322	9.95e-14	8.83e-13	3.79269	Dscr6	protein ripply3 [Source:RefSeq peptide;Acc:NP_001099362]	E
ENSRNOG00000001685	-18.1952	2.18938	7.12e-15	6.78e-14	4.56108	D4AA39_RAT	Uncharacterized protein [Source:UniProtKB/TrEMBL;Acc:D4AA39]	E
ENSRNOG00000001688	-19.2526	1.37301	1.89e-05	8.29e-05	2.5901	Sim2	single-minded homolog 2 [Source:RefSeq peptide;Acc:NP_001100578]	E
ENSRNOG00000001689	-13.2368	-1.4589	5.4e-11	3.97e-10	-2.74898	D3ZIB8_RAT	ADP-ribosylation factor-like protein 6 [Source:RefSeq peptide;Acc:NP_001102312]	A
ENSRNOG00000001692	-16.6502	2.70428	6.78e-27	1.21e-25	6.51733	Chaf1b	chromatin assembly factor 1 subunit B [Source:RefSeq peptide;Acc:NP_001019912]	E
ENSRNOG00000001694	-17.928	1.65275	7.9e-10	5.29e-09	3.14431	None		E
ENSRNOG00000001700	-14.2367	-0.793069	0.000332744	0.00123819	-1.73276	Dfnb31	Whirlin [Source:UniProtKB/Swiss-Prot;Acc:Q810W9]	A
ENSRNOG00000001701	-17.4022	-3.7805	1.3e-44	4.77e-43	-13.7418	Cbr3	carbonyl reductase [Source:RefSeq peptide;Acc:NP_001100580]	A
ENSRNOG00000001702	-23.2105	-2.67544	0.00592367	0.0179969	-6.38834	LOC100360601	Uncharacterized protein [Source:UniProtKB/TrEMBL;Acc:D4ADW7]	A
ENSRNOG00000001704	-20.2833	2.48641	2.51e-09	1.61e-08	5.6038	Runx1	Runt-related transcription factor 1 [Source:UniProtKB/Swiss-Prot;Acc:Q63046]	E
ENSRNOG00000001706	-13.5798	-2.54528	3.14e-28	5.86e-27	-5.8372	Kalrn	Kalirin [Source:UniProtKB/Swiss-Prot;Acc:P97924]	A
ENSRNOG00000001708	-14.837	1.80293	3.59e-15	3.5e-14	3.48928	Dvl3	dishevelled, dsh homolog 3 [Source:RefSeq peptide;Acc:NP_001100551]	E
ENSRNOG00000001709	-11.0061	0.553352	0.0109047	0.0315651	1.46749	Ap2m1	AP-2 complex subunit mu [Source:UniProtKB/Swiss-Prot;Acc:P84092]	E
ENSRNOG00000001711	-15.803	-1.63331	1.67e-12	1.36e-11	-3.10224	Hrasls	HRAS-like suppressor [Source:RefSeq peptide;Acc:NP_001099341]	A
ENSRNOG00000001712	-15.1993	-0.589894	0.00838346	0.0248503	-1.50514	Alg3	dolichyl-P-Man:Man(5)GlcNAc(2)-PP-dolichyl mannosyltransferase [Source:RefSeq peptide;Acc:NP_001135835]	A
ENSRNOG00000001714	-17.7205	-4.62564	5.81e-58	3.65e-56	-24.6864	Atp13a4	probable cation-transporting ATPase 13A4 [Source:RefSeq peptide;Acc:NP_001178587]	A
ENSRNOG00000001717	-13.6005	-0.960152	1.32e-05	5.9e-05	-1.94551	Opa1	Dynamin-like 120 kDa protein, mitochondrialDynamin-like 120 kDa protein, form S1 [Source:UniProtKB/Swiss-Prot;Acc:Q2TA68]	A
ENSRNOG00000001720	-15.283	-0.835369	0.000201342	0.000772432	-1.78431	D4ADT9_RAT	Uncharacterized protein [Source:UniProtKB/TrEMBL;Acc:D4ADT9]	A
ENSRNOG00000001726	-18.3789	1.60456	1.35e-08	8.18e-08	3.04103	Tmem44	Uncharacterized protein [Source:UniProtKB/TrEMBL;Acc:D4ADT4]	E
ENSRNOG00000001728	-18.2594	4.98439	2.1e-54	1.12e-52	31.6556	Fam43a	family with sequence similarity 43, member A [Source:RefSeq peptide;Acc:NP_001034091]	E
ENSRNOG00000001729	-16.16	1.03966	8.17e-06	3.75e-05	2.05575	RGD1308154	Uncharacterized protein [Source:UniProtKB/TrEMBL;Acc:D4ADL7]	E
ENSRNOG00000001733	-11.925	-1.71853	1.3e-14	1.22e-13	-3.29101	Ppp1r2	Protein phosphatase inhibitor 2 [Source:UniProtKB/Swiss-Prot;Acc:P50411]	A
ENSRNOG00000001736	-15.5802	-2.30259	1.05e-22	1.52e-21	-4.93342	Bdh1	D-beta-hydroxybutyrate dehydrogenase, mitochondrial [Source:UniProtKB/Swiss-Prot;Acc:P29147]	A
ENSRNOG00000001742	-16.1383	0.757613	0.00105326	0.00362976	1.69069	Clcn2	Chloride channel protein 2 [Source:UniProtKB/Swiss-Prot;Acc:P35525]	E
ENSRNOG00000001748	-19.0988	1.22673	9.86e-05	0.000395172	2.34035	Polr2h	polymerase (RNA) II (DNA directed) polypeptide H [Source:RefSeq peptide;Acc:NP_001128261]	E
ENSRNOG00000001750	-18.2824	1.2117	1.08e-05	4.88e-05	2.31611	Chrd	Chordin [Source:UniProtKB/Swiss-Prot;Acc:Q63148]	E
ENSRNOG00000001752	-17.7909	3.5698	1.26e-35	3.23e-34	11.8746	Lrrc33	Leucine-rich repeat-containing protein 33 [Source:UniProtKB/Swiss-Prot;Acc:Q5BK65]	E
ENSRNOG00000001754	-15.8081	-0.714332	0.00171341	0.00570599	-1.64072	Wdr53	WD repeat-containing protein 53 [Source:RefSeq peptide;Acc:NP_001102525]	A
ENSRNOG00000001765	-22.1351	-2.38394	0.000537582	0.00193567	-5.21961	Ostalpha	organic solute transporter subunit alpha [Source:RefSeq peptide;Acc:NP_001100557]	A
ENSRNOG00000001766	-14.9338	1.61026	1.67e-12	1.36e-11	3.05306	Tfrc	Transferrin receptor protein 1 [Source:UniProtKB/Swiss-Prot;Acc:Q99376]	E
ENSRNOG00000001767	-16.4783	-0.599358	0.0103245	0.0300273	-1.51504	RGD1562339	Uncharacterized protein [Source:UniProtKB/TrEMBL;Acc:D4AC80]	A
ENSRNOG00000001769	-15.2865	0.835629	0.00021257	0.000812861	1.78464	Tnk2	Activated CDC42 kinase 1 [Source:UniProtKB/Swiss-Prot;Acc:Q5U2X5]	E
ENSRNOG00000001770	-17.3378	-1.85866	1.16e-13	1.02e-12	-3.62671	Ehhadh	Peroxisomal bifunctional enzymeEnoyl-CoA hydratase/3,2-trans-enoyl-CoA isomerase3-hydroxyacyl-CoA dehydrogenase [Source:UniProtKB/Swiss-Prot;Acc:P07896]	A
ENSRNOG00000001781	-14.6882	0.760928	0.000634514	0.00226451	1.69458	D4AC69_RAT	leishmanolysin-like peptidase [Source:RefSeq peptide;Acc:NP_001102313]	E
ENSRNOG00000001782	-14.4521	0.567434	0.0103241	0.0300273	1.48189	Osbpl11	oxysterol-binding protein-related protein 11 [Source:RefSeq peptide;Acc:NP_001100560]	E
ENSRNOG00000001783	-12.9828	0.682464	0.00182151	0.00604007	1.60488	Tra2b	Transformer-2 protein homolog beta [Source:UniProtKB/Swiss-Prot;Acc:P62997]	E
ENSRNOG00000001785	-16.4789	2.8504	9.08e-30	1.82e-28	7.212	Etv5	ETS translocation variant 5 [Source:RefSeq peptide;Acc:NP_001100552]	E
ENSRNOG00000001793	-13.4292	-1.32823	2.14e-09	1.39e-08	-2.51094	Heg1	HEG homolog 1 (zebrafish) Gene [Source:MGI Symbol;Acc:MGI:1924696]	A
ENSRNOG00000001795	-12.0665	-2.63582	2.82e-30	5.77e-29	-6.2153	D4AC54_RAT	integrin, beta 5 [Source:RefSeq peptide;Acc:NP_671480]	A
ENSRNOG00000001796	-18.9154	-2.6239	1.9e-18	2.23e-17	-6.16413	Dgkg	Diacylglycerol kinase gamma [Source:UniProtKB/Swiss-Prot;Acc:P49620]	A
ENSRNOG00000001803	-12.3985	-0.897546	4.14e-05	0.000173689	-1.86289	Dnajb11	DnaJ homolog subfamily B member 11 [Source:UniProtKB/Swiss-Prot;Acc:Q6TUG0]	A
ENSRNOG00000001807	-16.3534	-0.556815	0.0166143	0.0466051	-1.47102	Sspn	sarcospan [Source:RefSeq peptide;Acc:NP_001102725]	A
ENSRNOG00000001808	-14.3364	0.543579	0.0139166	0.0396452	1.45758	LOC690728	similar to Protein C12orf11 (Sarcoma antigen NY-SAR-95) (LOC690728), mRNA [Source:RefSeq DNA;Acc:NM_001109608]	E
ENSRNOG00000001811	-13.6287	-1.42602	1.52e-10	1.08e-09	-2.68704	Fgfr1op2	FGFR1 oncogene partner 2 homolog [Source:UniProtKB/Swiss-Prot;Acc:Q6TA25]	A
ENSRNOG00000001813	-12.5639	-1.40169	2.46e-10	1.72e-09	-2.64212	DNM1L_RAT	Dynamin-1-like protein [Source:UniProtKB/Swiss-Prot;Acc:O35303]	A
ENSRNOG00000001815	-10.5042	-1.76069	2.82e-15	2.75e-14	-3.38861	Eif4a2	Eukaryotic initiation factor 4A-II [Source:UniProtKB/Swiss-Prot;Acc:Q5RKI1]	A
ENSRNOG00000001816	-16.4697	1.6411	8.64e-12	6.72e-11	3.11903	Rfc4	replication factor C subunit 4 [Source:RefSeq peptide;Acc:NP_001099339]	E
ENSRNOG00000001817	-15.3964	-1.41994	4.43e-10	3.03e-09	-2.67574	Tm7sf3	Transmembrane 7 superfamily member 3 [Source:UniProtKB/Swiss-Prot;Acc:Q5FVF4]	A
ENSRNOG00000001818	-14.5491	-0.842582	0.000148216	0.000580633	-1.79326	FGD4_RAT	FYVE, RhoGEF and PH domain-containing protein 4 [Source:UniProtKB/Swiss-Prot;Acc:O88387]	A
ENSRNOG00000001820	-15.8361	-0.562141	0.0134067	0.038296	-1.47646	D4AA11_RAT	mediator of RNA polymerase II transcription subunit 21 [Source:RefSeq peptide;Acc:NP_001101365]	A
ENSRNOG00000001821	-16.9837	-9.81351	1.5e-165	4.41e-162	-899.829	Adipoq-m3Mcwi-	adiponectin [Source:RefSeq peptide;Acc:NP_653345]	A
ENSRNOG00000001823	-11.8782	-2.22584	9.88e-23	1.43e-21	-4.67784	St6gal1	Beta-galactoside alpha-2,6-sialyltransferase 1 [Source:UniProtKB/Swiss-Prot;Acc:P13721]	A
ENSRNOG00000001825	-15.9123	-2.52623	4.1e-26	7.08e-25	-5.76065	Pkp2	plakophilin-2 [Source:RefSeq peptide;Acc:NP_001093969]	A
ENSRNOG00000001827	-17.7275	3.08899	6.85e-29	1.32e-27	8.50901	Masp1	Mannan-binding lectin serine protease 1Mannan-binding lectin serine protease 1 heavy chainMannan-binding lectin serine protease 1 light chain [Source:UniProtKB/Swiss-Prot;Acc:Q8CHN8]	E
ENSRNOG00000001828	-16.8312	-0.880295	0.000223413	0.000851894	-1.84075	D4AA09_RAT	Uncharacterized protein [Source:UniProtKB/TrEMBL;Acc:D4AA09]	A
ENSRNOG00000001829	-13.982	-1.00154	6.08e-06	2.83e-05	-2.00214	Ube2v2	Ubiquitin-conjugating enzyme E2 variant 2 [Source:UniProtKB/Swiss-Prot;Acc:Q7M767]	A
ENSRNOG00000001833	-16.2255	3.141	1.03e-35	2.65e-34	8.82137	RGD1563943	minichromosome maintenance deficient 4 [Source:RefSeq peptide;Acc:NP_387500]	E
ENSRNOG00000001834	-16.2238	0.826084	0.000380062	0.00139838	1.77287	Fam128b	family with sequence similarity 128, member B [Source:RefSeq peptide;Acc:NP_001099330]	E
ENSRNOG00000001837	-20.7517	-1.37455	0.00184967	0.00612451	-2.59287	Sst	SomatostatinAntrinSomatostatin-28Somatostatin-14 [Source:UniProtKB/Swiss-Prot;Acc:P60042]	A
ENSRNOG00000001843	-17.0098	-1.57332	9.49e-11	6.85e-10	-2.97588	Bcl6	B-cell CLL/lymphoma 6 [Source:RefSeq peptide;Acc:NP_001100554]	A
ENSRNOG00000001847	-14.7106	-0.688058	0.00193007	0.00637281	-1.61111	Ccdc91	Coiled-coil domain-containing protein 91 [Source:UniProtKB/Swiss-Prot;Acc:Q6AY97]	A
ENSRNOG00000001851	-19.3271	0.838022	0.00928224	0.0271836	1.7876	Far2	Uncharacterized protein [Source:UniProtKB/TrEMBL;Acc:D4A2S1]	E
ENSRNOG00000001852	-14.0513	-0.738249	0.000813803	0.00285291	-1.66815	Ergic2	endoplasmic reticulum-Golgi intermediate compartment protein 2 [Source:RefSeq peptide;Acc:NP_001020155]	A
ENSRNOG00000001854	-15.1565	-1.76222	1.3e-14	1.22e-13	-3.39219	D4A2M3_RAT	Uncharacterized protein [Source:UniProtKB/TrEMBL;Acc:D4A2M3]	A
ENSRNOG00000001858	-18.2079	2.53898	6.25e-19	7.52e-18	5.8118	D4A9Y3_RAT	RCG36512Uncharacterized protein [Source:UniProtKB/TrEMBL;Acc:D4A9Y3]	E
ENSRNOG00000001859	-13.3641	-1.18591	8.09e-08	4.53e-07	-2.27506	Sdf2l1	stromal cell-derived factor 2-like protein 1 [Source:RefSeq peptide;Acc:NP_001102903]	A
ENSRNOG00000001861	-19.1739	0.827422	0.00786325	0.0234166	1.77451	Ydjc	YdjC homolog [Source:RefSeq peptide;Acc:NP_001013885]	E
ENSRNOG00000001862	-12.3933	-0.517251	0.0175761	0.0486961	-1.43123	Ube2l3	ubiquitin-conjugating enzyme E2L 3 (Ube2l3), mRNA [Source:RefSeq DNA;Acc:NM_001108847]	A
ENSRNOG00000001863	-16.7584	2.23377	2.61e-19	3.21e-18	4.70361	Hic2	hypermethylated in cancer 2 protein [Source:RefSeq peptide;Acc:NP_001099332]	E
ENSRNOG00000001868	-14.0966	1.00286	6.25e-06	2.9e-05	2.00397	Crkl	Crk-like protein [Source:UniProtKB/Swiss-Prot;Acc:Q5U2U2]	E
ENSRNOG00000001870	-14.2476	1.13309	3.75e-07	1.97e-06	2.19329	Lztr1	leucine-zipper-like transcriptional regulator 1 [Source:RefSeq peptide;Acc:NP_001101796]	E
ENSRNOG00000001872	-15.7934	-1.14214	5.95e-07	3.07e-06	-2.20708	D3ZZW7_RAT	Uncharacterized protein [Source:UniProtKB/TrEMBL;Acc:D3ZZW7]	A
ENSRNOG00000001873	-14.4813	-1.17179	1.5e-07	8.24e-07	-2.25291	P2rx6	P2X purinoceptor 6 [Source:UniProtKB/Swiss-Prot;Acc:P51579]	A
ENSRNOG00000001874	-14.0904	-2.00545	1.12e-18	1.33e-17	-4.01513	Slc7a4	cationic amino acid transporter 4 [Source:RefSeq peptide;Acc:NP_001100548]	A
ENSRNOG00000001875	-14.2983	-0.628573	0.00438281	0.0136886	-1.54603	Smpd4	sphingomyelin phosphodiesterase 4 [Source:RefSeq peptide;Acc:NP_001161278]	A
ENSRNOG00000001876	-20.3167	2.21294	1.23e-07	6.78e-07	4.6362	Ccdc74a		E
ENSRNOG00000001884	-15.5285	2.28444	5.31e-22	7.48e-21	4.87175	Ranbp1	ran-specific GTPase-activating protein [Source:RefSeq peptide;Acc:NP_001101794]	E
ENSRNOG00000001885	-15.2685	1.38338	1.35e-09	8.87e-09	2.60878	Trmt2a	tRNA (uracil-5-)-methyltransferase homolog A [Source:RefSeq peptide;Acc:NP_001011895]	E
ENSRNOG00000001888	-13.4237	1.3644	8.54e-10	5.71e-09	2.57469	Arvcf	armadillo repeat gene deleted in velo-cardio-facial syndrome [Source:RefSeq peptide;Acc:NP_001124485]	E
ENSRNOG00000001889	-12.0532	-1.46455	3.78e-11	2.81e-10	-2.75978	Comt	Catechol O-methyltransferase [Source:UniProtKB/Swiss-Prot;Acc:P22734]	A
ENSRNOG00000001891	-17.902	1.10732	2.45e-05	0.000105892	2.15445	Gnb1l	Uncharacterized protein [Source:UniProtKB/TrEMBL;Acc:D3ZSP4]	E
ENSRNOG00000001892	-35.6222	28.7877	5.43e-06	2.54e-05	4.63404e+08	Tbx1	T-box transcription factor TBX1 [Source:RefSeq peptide;Acc:NP_001101792]	E
ENSRNOG00000001907	-33.7346	32.5628	1.44e-42	4.85e-41	6.34433e+09	B3gnt5	UDP-GlcNAc:betaGal beta-1,3-N-acetylglucosaminyltransferase 5 [Source:UniProtKB/Swiss-Prot;Acc:Q99NB2]	E
ENSRNOG00000001908	-18.8986	2.86218	3.03e-19	3.71e-18	7.27115	Klhl6	kelch-like protein 6 [Source:RefSeq peptide;Acc:NP_001099337]	E
ENSRNOG00000001911	-20.5527	2.91297	4.93e-11	3.63e-10	7.53169	Map6d1	MAP6 domain-containing protein 1 [Source:RefSeq peptide;Acc:NP_001102314]	E
ENSRNOG00000001915	-19.6016	4.55181	3.54e-33	8.32e-32	23.4548	Chodl	chondrolectin [Source:RefSeq peptide;Acc:NP_001099364]	E
ENSRNOG00000001924	-35.8795	28.2731	0.000268752	0.00101105	3.2438e+08	Tp63	Tumor protein 63 [Source:UniProtKB/Swiss-Prot;Acc:Q9JJP6]	E
ENSRNOG00000001925	-17.95	-4.70113	6.15e-58	3.83e-56	-26.0124	Leprel1	Prolyl 3-hydroxylase 2 [Source:UniProtKB/Swiss-Prot;Acc:Q4KLM6]	A
ENSRNOG00000001928	-14.541	-1.10424	7.29e-07	3.73e-06	-2.14985	Il1rap	Interleukin-1 receptor accessory protein [Source:UniProtKB/Swiss-Prot;Acc:Q63621]	A
ENSRNOG00000001930	-15.9607	1.05749	4.8e-06	2.26e-05	2.08131	Ccdc50	Coiled-coil domain-containing protein 50 [Source:UniProtKB/Swiss-Prot;Acc:Q810U0]	E
ENSRNOG00000001931	-19.1411	5.74027	9.83e-54	5.08e-52	53.4556	Fgf12	Fibroblast growth factor 12 [Source:UniProtKB/Swiss-Prot;Acc:P61150]	E
ENSRNOG00000001947	-17.3123	0.915788	0.000237678	0.000901973	1.8866	RGD1559834	None	E
ENSRNOG00000001953	-19.1922	2.09884	1.15e-10	8.24e-10	4.28366	Bace2	Beta-secretase 2 [Source:UniProtKB/Swiss-Prot;Acc:Q6IE75]	E
ENSRNOG00000001956	-15.6504	1.3119	1.17e-08	7.08e-08	2.48267	Dzip3	Similar to Ubiquitin ligase protein DZIP3 (DAZ-interacting protein 3 homolog) (Predicted)Uncharacterized protein [Source:UniProtKB/TrEMBL;Acc:D3ZY61]	E
ENSRNOG00000001959	-18.6731	-2.98345	7.33e-24	1.13e-22	-7.90876	Mx1	Interferon-induced GTP-binding protein Mx1 [Source:UniProtKB/Swiss-Prot;Acc:P18588]	A
ENSRNOG00000001960	-21.7489	-2.41702	0.000194452	0.000748533	-5.34065	Sult1d1	sulfotransferase family 1D, member 1 [Source:RefSeq peptide;Acc:NP_068537]	A
ENSRNOG00000001962	-23.5368	3.5934	0.00125285	0.00427858	12.0704	Fam3b	family with sequence similarity 3, member B [Source:RefSeq peptide;Acc:NP_001100572]	E
ENSRNOG00000001963	-16.7827	-2.3458	1.43e-21	1.98e-20	-5.08343	Mx2	Interferon-induced GTP-binding protein Mx3 [Source:UniProtKB/Swiss-Prot;Acc:P18590]	A
ENSRNOG00000001964	-14.0823	-2.14106	7.06e-21	9.41e-20	-4.41086	Cd47	Leukocyte surface antigen CD47 [Source:UniProtKB/Swiss-Prot;Acc:P97829]	A
ENSRNOG00000001966	-16.4077	-2.40222	3.41e-23	5.06e-22	-5.28616	Zbtb20	zinc finger and BTB domain-containing protein 20 [Source:RefSeq peptide;Acc:NP_001099350]	A
ENSRNOG00000001973	-35.944	-28.1442	0.000367404	0.001354	-2.96654e+08	Ugt2a1	UDP-glucuronosyltransferase 2A1 [Source:UniProtKB/Swiss-Prot;Acc:P36510]	A
ENSRNOG00000001974	-17.9875	3.03489	1.15e-26	2.04e-25	8.19585	Gramd1c	GRAM domain-containing protein 1C [Source:RefSeq peptide;Acc:NP_001178755]	E
ENSRNOG00000001976	-22.2468	-7.77158	3.56e-31	7.6e-30	-218.514	Tmprss2	transmembrane protease serine 2 [Source:RefSeq peptide;Acc:NP_569108]	A
ENSRNOG00000001982	-15.6033	0.794568	0.000470152	0.00170937	1.73456	Cblb	E3 ubiquitin-protein ligase CBL-B [Source:UniProtKB/Swiss-Prot;Acc:Q8K4S7]	E
ENSRNOG00000001986	-36.3441	27.3438	0.00473594	0.0146113	1.70339e+08	LOC498063	similar to RIKEN cDNA 4930563D23 (LOC498063), mRNA [Source:RefSeq DNA;Acc:NM_001017483]	E
ENSRNOG00000001989	-14.0526	-0.695743	0.00159706	0.00534147	-1.61972	Alcam	CD166 antigen [Source:UniProtKB/Swiss-Prot;Acc:O35112]	A
ENSRNOG00000001991	-11.7018	-1.54715	3.06e-12	2.46e-11	-2.92239	Atp5o	ATP synthase subunit O, mitochondrial [Source:UniProtKB/Swiss-Prot;Acc:Q06647]	A
ENSRNOG00000001992	-12.1975	-2.1522	1.97e-21	2.69e-20	-4.44505	Atp6v1a	V-type proton ATPase catalytic subunit A [Source:RefSeq peptide;Acc:NP_001101788]	A
ENSRNOG00000002001	-13.7765	1.2883	7.21e-09	4.45e-08	2.44241	Itsn1	Intersectin-1 [Source:UniProtKB/Swiss-Prot;Acc:Q9WVE9]	E
ENSRNOG00000002004	-21.5394	5.58683	7.15e-21	9.52e-20	48.0623	D4A123_RAT	Uncharacterized protein [Source:UniProtKB/TrEMBL;Acc:D4A123]	E
ENSRNOG00000002010	-12.3926	-0.521895	0.0166051	0.0465882	-1.43584	LOC100360017		A
ENSRNOG00000002012	-16.0683	1.40117	2.13e-09	1.38e-08	2.64116	Donson	protein downstream neighbor of Son [Source:RefSeq peptide;Acc:NP_001008288]	E
ENSRNOG00000002013	-20.7728	3.11412	7.87e-11	5.71e-10	8.65853	Sidt1	SID1 transmembrane family member 1 [Source:UniProtKB/Swiss-Prot;Acc:Q6Q3F5]	E
ENSRNOG00000002024	-19.5025	7.66393	3.1e-73	3.61e-71	202.802	Epha5	Ephrin type-A receptor 5 [Source:UniProtKB/Swiss-Prot;Acc:P54757]	E
ENSRNOG00000002026	-16.2785	-2.14897	2.16e-19	2.68e-18	-4.43512	Dnajc28	dnaJ homolog subfamily C member 28 [Source:RefSeq peptide;Acc:NP_001014146]	A
ENSRNOG00000002028	-13.3467	-1.56469	2.35e-12	1.91e-11	-2.95814	Tmem50b	transmembrane protein 50B [Source:RefSeq peptide;Acc:NP_001020185]	A
ENSRNOG00000002035	-14.4815	-1.67052	1.4e-13	1.23e-12	-3.1833	Paqr3	progestin and adipoQ receptor family member 3 [Source:RefSeq peptide;Acc:NP_001012033]	A
ENSRNOG00000002036	-15.2078	0.785521	0.000487959	0.00176758	1.72371	LOC681004	Uncharacterized protein [Source:UniProtKB/TrEMBL;Acc:D4A8C8]	E
ENSRNOG00000002039	-13.8687	-0.538926	0.0141759	0.0403294	-1.45289	LOC100360066	Uncharacterized protein [Source:UniProtKB/TrEMBL;Acc:D3ZJN9]	A
ENSRNOG00000002044	-16.841	-0.95913	5.91e-05	0.000243476	-1.94414	Gtpbp8	GTP-binding protein 8 [Source:UniProtKB/Swiss-Prot;Acc:Q5BK22]	A
ENSRNOG00000002050	-13.9595	-1.04597	2.3e-06	1.12e-05	-2.06475	Igfbp7	insulin-like growth factor-binding protein 7 [Source:RefSeq peptide;Acc:NP_001013066]	A
ENSRNOG00000002051	-14.3203	-1.01335	4.98e-06	2.34e-05	-2.01859	Synj1	Synaptojanin-1 [Source:UniProtKB/Swiss-Prot;Acc:Q62910]	A
ENSRNOG00000002052	-13.1141	-0.803638	0.000246781	0.000935433	-1.7455	Ccdc80	Coiled-coil domain-containing protein 80 [Source:UniProtKB/Swiss-Prot;Acc:Q6QD51]	A
ENSRNOG00000002053	-13.1864	2.31654	4.66e-24	7.25e-23	4.98135	Fras1	Fraser syndrome 1 homolog (human) Gene [Source:MGI Symbol;Acc:MGI:2385368]	E
ENSRNOG00000002054	-16.4388	0.981894	2.99e-05	0.000127837	1.97506	Glmn	glomulin [Source:RefSeq peptide;Acc:NP_001099463]	E
ENSRNOG00000002057	-18.9624	-1.91579	1.42e-10	1.01e-09	-3.77321	Slc10a6	Solute carrier family 10 member 6 [Source:UniProtKB/Swiss-Prot;Acc:Q70EX6]	A
ENSRNOG00000002061	-12.7294	0.727153	0.000887187	0.00309178	1.65537	Ptpn13	tyrosine-protein phosphatase non-receptor type 13 [Source:RefSeq peptide;Acc:NP_001094259]	E
ENSRNOG00000002070	-16.2051	-0.740959	0.00131075	0.00444697	-1.67129	Mrpl1	39S ribosomal protein L1, mitochondrial [Source:RefSeq peptide;Acc:NP_001099467]	A
ENSRNOG00000002072	-19.6734	-1.5795	2.25e-06	1.1e-05	-2.98867	RGD1307569	Uncharacterized protein [Source:UniProtKB/TrEMBL;Acc:D3ZP62]	A
ENSRNOG00000002074	-14.071	0.806094	0.000267586	0.00100872	1.74847	Rest	RE1-silencing transcription factor [Source:UniProtKB/Swiss-Prot;Acc:O54963]	E
ENSRNOG00000002075	-13.6432	-0.548051	0.0125112	0.0358912	-1.46211	Cnot6l	CCR4-NOT transcription complex subunit 6-like [Source:RefSeq peptide;Acc:NP_001101825]	A
ENSRNOG00000002079	-16.2242	-0.699614	0.00245927	0.00800364	-1.62407	Mapk10	Mitogen-activated protein kinase 10 [Source:UniProtKB/Swiss-Prot;Acc:P49187]	A
ENSRNOG00000002080	-15.4508	1.07819	2.14e-06	1.04e-05	2.11138	Urb1	nucleolar pre-ribosomal-associated protein 1 [Source:RefSeq peptide;Acc:NP_001178590]	E
ENSRNOG00000002085	-22.4398	-2.21926	0.00284556	0.00913637	-4.65654	LOC498350	similar to testicular haploid expressed gene product isoform 2 (LOC498350), mRNA [Source:RefSeq DNA;Acc:NM_001017498]	A
ENSRNOG00000002089	-13.8879	-0.767116	0.000498874	0.0018044	-1.70186	Ccng2	cyclin-G2 [Source:RefSeq peptide;Acc:NP_001099195]	A
ENSRNOG00000002091	-14.9078	0.627451	0.00492459	0.0151485	1.54483	Gtf3c3	general transcription factor 3C polypeptide 3 [Source:RefSeq peptide;Acc:NP_001101709]	E
ENSRNOG00000002092	-17.2802	5.25456	9.65e-70	9.77e-68	38.1752	Hunk	hormonally up-regulated neu tumor-associated kinase [Source:RefSeq peptide;Acc:NP_001178591]	E
ENSRNOG00000002094	-14.5999	-1.21133	6.12e-08	3.48e-07	-2.31551	Atg3	Ubiquitin-like-conjugating enzyme ATG3 [Source:UniProtKB/Swiss-Prot;Acc:Q6AZ50]	A
ENSRNOG00000002095	-13.8699	-1.01743	4.19e-06	1.98e-05	-2.02431	Arhgap24	Rho GTPase-activating protein 24 [Source:UniProtKB/Swiss-Prot;Acc:Q5U2Z7]	A
ENSRNOG00000002097	-16.3056	1.06109	5.89e-06	2.75e-05	2.08651	Rasl11b	Ras-like protein family member 11B [Source:UniProtKB/Swiss-Prot;Acc:Q6IMA7]	E
ENSRNOG00000002099	-13.0015	0.667836	0.00227684	0.0074436	1.58869	Wdfy3	WD repeat and FYVE domain-containing protein 3 [Source:RefSeq peptide;Acc:NP_001164022]	E
ENSRNOG00000002101	-14.4794	-1.12902	4.13e-07	2.17e-06	-2.1871	Paics	Multifunctional protein ADE2Phosphoribosylaminoimidazole-succinocarboxamide synthasePhosphoribosylaminoimidazole carboxylase [Source:UniProtKB/Swiss-Prot;Acc:P51583]	A
ENSRNOG00000002105	-16.5807	2.23153	1.32e-19	1.65e-18	4.69631	Cdc7	cell division cycle 7-related protein kinase [Source:RefSeq peptide;Acc:NP_001101822]	E
ENSRNOG00000002114	-19.3554	1.16737	0.000413504	0.00151519	2.24601	D4A893_RAT	Uncharacterized protein [Source:UniProtKB/TrEMBL;Acc:D4A893]	E
ENSRNOG00000002115	-11.3703	-1.76437	2.63e-15	2.57e-14	-3.39725	Sod1	Superoxide dismutase [Cu-Zn] [Source:UniProtKB/Swiss-Prot;Acc:P07632]	A
ENSRNOG00000002116	-16.4703	1.31723	2.84e-08	1.66e-07	2.49188	LOC498555	60S acidic ribosomal protein P2 [Source:UniProtKB/Swiss-Prot;Acc:P02401]	E
ENSRNOG00000002117	-33.1585	33.7152	6.5e-65	5.18e-63	1.41021e+10	Barhl2	BarH-like 2 homeobox protein [Source:UniProtKB/Swiss-Prot;Acc:O88181]	E
ENSRNOG00000002120	-14.7239	2.20674	1.71e-21	2.34e-20	4.61632	Spata18	Spermatogenesis-associated protein 18 [Source:UniProtKB/Swiss-Prot;Acc:Q6AYL6]	E
ENSRNOG00000002122	-13.2647	0.64009	0.0034892	0.0110684	1.55843	Lrrc8c	Leucine-rich repeat-containing protein 8C [Source:UniProtKB/Swiss-Prot;Acc:Q498T9]	E
ENSRNOG00000002125	-11.0186	-1.35047	9.05e-10	6.04e-09	-2.54994	Ccni	cyclin-I [Source:RefSeq peptide;Acc:NP_001099468]	A
ENSRNOG00000002126	-18.7329	1.19367	3.46e-05	0.000146269	2.28733	Ncam2	neural cell adhesion molecule 2 [Source:RefSeq peptide;Acc:NP_981954]	E
ENSRNOG00000002127	-19.6406	-1.68384	6.34e-07	3.26e-06	-3.21281	None	None	A
ENSRNOG00000002129	-14.4942	0.692478	0.00180346	0.00598428	1.61606	Lrrc8b	leucine rich repeat containing 8 family, member B [Source:RefSeq peptide;Acc:NP_001100674]	E
ENSRNOG00000002135	-13.9884	-1.21787	4.24e-08	2.44e-07	-2.32603	Sgcb	beta-sarcoglycan [Source:RefSeq peptide;Acc:NP_001177997]	A
ENSRNOG00000002137	-13.8017	-1.07026	1.31e-06	6.53e-06	-2.09982	Aasdh	Uncharacterized protein [Source:UniProtKB/TrEMBL;Acc:D4A5F5]	A
ENSRNOG00000002139	-16.2877	3.64802	2.57e-45	9.62e-44	12.5362	D4A5F4_RAT	Uncharacterized protein [Source:UniProtKB/TrEMBL;Acc:D4A5F4]	E
ENSRNOG00000002141	-16.2676	0.890557	0.000122413	0.000484571	1.85389	Cd200	OX-2 membrane glycoprotein [Source:UniProtKB/Swiss-Prot;Acc:P04218]	E
ENSRNOG00000002142	-12.1431	-2.73228	3.71e-32	8.31e-31	-6.64506	Cds1	Phosphatidate cytidylyltransferase 1 [Source:UniProtKB/Swiss-Prot;Acc:O35052]	A
ENSRNOG00000002144	-13.9642	-0.735517	0.000842587	0.00294192	-1.66499	Sec3l1	SEC3-like 1 [Source:RefSeq peptide;Acc:NP_001019941]	A
ENSRNOG00000002146	-14.1061	-1.26022	1.5e-08	9.06e-08	-2.39533	Pkd2	polycystin-2 [Source:RefSeq peptide;Acc:NP_001178863]	A
ENSRNOG00000002149	-19.2879	3.04303	4.31e-19	5.24e-18	8.24221	Nkx6-1	Homeobox protein Nkx-6.1 [Source:UniProtKB/Swiss-Prot;Acc:O35762]	E
ENSRNOG00000002151	-17.7276	1.52761	2.81e-09	1.8e-08	2.88309	TAGL3_RAT	Transgelin-3 [Source:UniProtKB/Swiss-Prot;Acc:P37805]	E
ENSRNOG00000002152	-13.4169	-1.15214	1.85e-07	1e-06	-2.22243	Dcun1d4	DCN1-like protein 4 [Source:RefSeq peptide;Acc:NP_001101829]	A
ENSRNOG00000002153	-15.1932	1.44315	2.51e-10	1.75e-09	2.71914	Cep135	Uncharacterized protein [Source:UniProtKB/TrEMBL;Acc:D3ZI35]	E
ENSRNOG00000002158	-23.4728	3.7191	0.000744685	0.0026259	13.1693	Ibsp	Bone sialoprotein 2 [Source:UniProtKB/Swiss-Prot;Acc:P13839]	E
ENSRNOG00000002161	-18.582	-3.01035	3.01e-25	4.99e-24	-8.05762	Tlr6	toll-like receptor 6 [Source:RefSeq peptide;Acc:NP_997487]	A
ENSRNOG00000002163	-13.9853	0.990733	7.79e-06	3.58e-05	1.98719	Klf3	Krueppel-like factor 3 [Source:RefSeq peptide;Acc:NP_001099212]	E
ENSRNOG00000002167	-21.9875	2.04875	0.00300272	0.00959963	4.13749	Dmp1	Dentin matrix acidic phosphoprotein 1 [Source:UniProtKB/Swiss-Prot;Acc:P98193]	E
ENSRNOG00000002169	-19.9213	1.42519	0.000141207	0.000555242	2.6855	Pdcl2		E
ENSRNOG00000002171	-15.4207	2.66457	8.9e-29	1.71e-27	6.3404	D4A5C1_RAT	Uncharacterized protein [Source:UniProtKB/TrEMBL;Acc:D3ZTL3]	E
ENSRNOG00000002175	-15.4229	-1.8695	5.13e-16	5.22e-15	-3.65407	Clock	Circadian locomoter output cycles protein kaput [Source:UniProtKB/Swiss-Prot;Acc:Q9WVS9]	A
ENSRNOG00000002176	-13.8282	0.575011	0.00892559	0.0263539	1.48969	Pvrl3	poliovirus receptor-related protein 3 [Source:RefSeq peptide;Acc:NP_001099353]	E
ENSRNOG00000002178	-15.7937	-0.88264	0.000107666	0.000429252	-1.84375	Mrps18c	28S ribosomal protein S18c, mitochondrial [Source:RefSeq peptide;Acc:NP_001099466]	A
ENSRNOG00000002180	-14.5123	0.950767	2.01e-05	8.76e-05	1.9329	Tbc1d1	Uncharacterized protein [Source:UniProtKB/TrEMBL;Acc:D4A4U9]	E
ENSRNOG00000002182	-14.0785	2.37655	9.05e-25	1.46e-23	5.19293	Sep11	Septin-11 [Source:UniProtKB/Swiss-Prot;Acc:B3GNI6]	E
ENSRNOG00000002186	-14.7278	-0.543787	0.014184	0.0403446	-1.45779	Nudt9	ADP-ribose pyrophosphatase, mitochondrial [Source:UniProtKB/Swiss-Prot;Acc:Q5XIG0]	A
ENSRNOG00000002190	-18.873	3.88108	6.51e-32	1.44e-30	14.7341	RGD1563065		E
ENSRNOG00000002192	-18.5144	0.774831	0.00644884	0.019478	1.71099	Rell1	RELT-like protein 1 [Source:RefSeq peptide;Acc:NP_001107248]	E
ENSRNOG00000002195	-21.2337	2.19377	5.13e-05	0.00021275	4.57498	D4A6J7_RAT	Glyceraldehyde-3-phosphate dehydrogenase [Source:UniProtKB/TrEMBL;Acc:D4A6J7]	E
ENSRNOG00000002196	-16.383	-0.659651	0.00450758	0.0140286	-1.5797	LOC100365923	RCG57079, isoform CRA_aUncharacterized protein [Source:UniProtKB/TrEMBL;Acc:D4A4Q4]	A
ENSRNOG00000002198	-14.6136	0.818943	0.000237167	0.000900264	1.76411	LOC685352	None	E
ENSRNOG00000002201	-14.5288	0.83216	0.000184212	0.000712181	1.78035	D3ZLN0_RAT	Uncharacterized protein [Source:UniProtKB/TrEMBL;Acc:D3ZLN0]	E
ENSRNOG00000002202	-19.9236	1.11251	0.0026142	0.00843058	2.16221	Ankrd56	Uncharacterized protein [Source:UniProtKB/TrEMBL;Acc:D4A4Q1]	E
ENSRNOG00000002204	-18.3747	-0.922808	0.000755395	0.00266081	-1.8958	Ccdc158	Uncharacterized protein [Source:UniProtKB/TrEMBL;Acc:D3ZHH5]	A
ENSRNOG00000002205	-11.6525	-1.10776	4.46e-07	2.33e-06	-2.1551	Ociad1	OCIA domain-containing protein 1 [Source:UniProtKB/Swiss-Prot;Acc:Q5XIG4]	A
ENSRNOG00000002207	-14.1282	-1.23521	2.87e-08	1.68e-07	-2.35415	Guf1	GTP-binding protein GUF1 homolog [Source:RefSeq peptide;Acc:NP_001100685]	A
ENSRNOG00000002208	-13.1711	0.685258	0.00176464	0.00586269	1.60799	Shroom3	protein Shroom3 [Source:RefSeq peptide;Acc:NP_001094359]	E
ENSRNOG00000002210	-14.3493	-1.04396	2.62e-06	1.27e-05	-2.06188	Hsd17b11	Estradiol 17-beta-dehydrogenase 11 [Source:UniProtKB/Swiss-Prot;Acc:Q6AYS8]	A
ENSRNOG00000002212	-21.9579	2.75018	3.91e-05	0.000164431	6.72799	Hsd17b13	17-beta-hydroxysteroid dehydrogenase 13 [Source:UniProtKB/Swiss-Prot;Acc:Q5M875]	E
ENSRNOG00000002214	-14.8671	-2.18443	2.97e-21	4.03e-20	-4.54546	Klhl8	kelch-like protein 8 [Source:RefSeq peptide;Acc:NP_001099465]	A
ENSRNOG00000002215	-15.1909	3.27724	6.66e-41	2.11e-39	9.69499	D3ZFU9_RAT	myosin light chain kinase, smooth muscle [Source:RefSeq peptide;Acc:NP_001099344]	E
ENSRNOG00000002224	-22.2852	-2.07796	0.00458757	0.0142415	-4.22209	Yipf7	protein YIPF7 [Source:RefSeq peptide;Acc:NP_001102331]	A
ENSRNOG00000002225	-12.231	-1.96112	2.78e-18	3.24e-17	-3.89363	Scarb2	Lysosome membrane protein 2 [Source:UniProtKB/Swiss-Prot;Acc:P27615]	A
ENSRNOG00000002227	-14.0558	3.39985	5.57e-45	2.07e-43	10.5549	Kit	mast/stem cell growth factor receptor [Source:RefSeq peptide;Acc:NP_071600]	E
ENSRNOG00000002229	-17.4044	2.33653	3.71e-19	4.52e-18	5.05086	Adcy5	Adenylate cyclase type 5 [Source:UniProtKB/Swiss-Prot;Acc:Q04400]	E
ENSRNOG00000002232	-15.7222	-1.1135	1.04e-06	5.23e-06	-2.1637	Aff1	AF4/FMR2 family member 1 [Source:RefSeq peptide;Acc:NP_001100676]	A
ENSRNOG00000002238	-33.6169	32.7984	6.39e-46	2.45e-44	7.46948e+09	Sema5b	sema domain, seven thrombospondin repeats (type 1 and type 1-like), transmembrane domain (TM) and short cytoplasmic domain, (semaphorin) 5B [Source:RefSeq peptide;Acc:NP_001100561]	E
ENSRNOG00000002240	-14.3693	-0.756707	0.000622042	0.00222134	-1.68963	Dirc2	Disrupted in renal carcinoma protein 2 homolog [Source:UniProtKB/Swiss-Prot;Acc:Q66H95]	A
ENSRNOG00000002244	-11.6159	-1.52265	6.41e-12	5.03e-11	-2.87319	Pdgfra	Alpha-type platelet-derived growth factor receptor [Source:UniProtKB/Swiss-Prot;Acc:P20786]	A
ENSRNOG00000002246	-13.5766	-0.811146	0.000225235	0.000857843	-1.7546	Slc30a9	zinc transporter 9 [Source:RefSeq peptide;Acc:NP_001102558]	A
ENSRNOG00000002248	-13.3938	1.23666	2.43e-08	1.43e-07	2.35653	RGD1311309	Uncharacterized protein [Source:UniProtKB/TrEMBL;Acc:D3ZNC1]	E
ENSRNOG00000002251	-12.3687	-0.531574	0.0146941	0.0416589	-1.44551	Sec31a	Protein transport protein Sec31A [Source:UniProtKB/Swiss-Prot;Acc:Q9Z2Q1]	A
ENSRNOG00000002254	-12.3325	-1.89965	2.66e-17	2.94e-16	-3.73121	Tmem33	Transmembrane protein 33 [Source:UniProtKB/Swiss-Prot;Acc:Q9Z142]	A
ENSRNOG00000002255	-14.2692	-1.82781	6.82e-16	6.89e-15	-3.54999	Fam162a	Protein FAM162A [Source:UniProtKB/Swiss-Prot;Acc:Q4QQV3]	A
ENSRNOG00000002256	-19.8468	-1.7907	2.39e-07	1.28e-06	-3.45984	Art3	ecto-ADP-ribosyltransferase 3 [Source:RefSeq peptide;Acc:NP_001012034]	A
ENSRNOG00000002258	-14.1714	-1.00441	5.83e-06	2.72e-05	-2.00612	Tmem150c	Transmembrane protein 150C [Source:UniProtKB/Swiss-Prot;Acc:B5DFH9]	A
ENSRNOG00000002265	-23.152	-2.79077	0.00592367	0.0179969	-6.91998	Casr	Extracellular calcium-sensing receptor [Source:UniProtKB/Swiss-Prot;Acc:P48442]	A
ENSRNOG00000002270	-13.38	1.36412	8.47e-10	5.67e-09	2.57419	D3ZN89_RAT	Uncharacterized protein [Source:UniProtKB/TrEMBL;Acc:D3ZN89]	E
ENSRNOG00000002271	-12.4508	-0.882756	5.53e-05	0.000228652	-1.84389	Slain2	SLAIN motif-containing protein 2 [Source:RefSeq peptide;Acc:NP_001100684]	A
ENSRNOG00000002273	-17.3017	-1.39272	1.57e-08	9.42e-08	-2.62573	Naaa	N-acylethanolamine-hydrolyzing acid amidase [Source:UniProtKB/Swiss-Prot;Acc:Q5KTC7]	A
ENSRNOG00000002275	-13.1573	0.764522	0.000492436	0.00178292	1.69881	Fip1l1	Pre-mRNA 3'-end-processing factor FIP1 [Source:UniProtKB/Swiss-Prot;Acc:Q5U317]	E
ENSRNOG00000002278	-14.7328	-1.41411	3.32e-10	2.29e-09	-2.66495	Tec	tyrosine-protein kinase Tec [Source:RefSeq peptide;Acc:NP_445884]	A
ENSRNOG00000002280	-9.7624	-2.8771	3.04e-35	7.71e-34	-7.34673	Sh3bgrl	SH3 domain binding glutamic acid-rich protein like [Source:RefSeq peptide;Acc:NP_001166810]	A
ENSRNOG00000002285	-17.1801	-1.36802	2.2e-08	1.3e-07	-2.58116	Fam122b	family with sequence similarity 122B [Source:RefSeq peptide;Acc:NP_001160058]	A
ENSRNOG00000002289	-18.9622	-3.42183	2.62e-28	4.93e-27	-10.717	Ildr1	immunoglobulin-like domain-containing receptor 1 [Source:RefSeq peptide;Acc:NP_001121008]	A
ENSRNOG00000002292	-11.8251	1.23407	2.1e-08	1.25e-07	2.35229	Hnrpd	Heterogeneous nuclear ribonucleoprotein C [Source:UniProtKB/Swiss-Prot;Acc:P17132]	E
ENSRNOG00000002294	-17.4487	0.993204	7.93e-05	0.000321775	1.9906	Snx29	sorting nexin-29 [Source:RefSeq peptide;Acc:NP_001102996]	E
ENSRNOG00000002301	-11.6437	-1.37367	4.91e-10	3.35e-09	-2.59129	Uso1	General vesicular transport factor p115 [Source:UniProtKB/Swiss-Prot;Acc:P41542]	A
ENSRNOG00000002302	-22.1084	2.44928	0.000260383	0.000983701	5.46144	CORIN_RAT	Atrial natriuretic peptide-converting enzymeAtrial natriuretic peptide-converting enzyme, N-terminal propeptideAtrial natriuretic peptide-converting enzyme, activated protease fragment [Source:UniProtKB/Swiss-Prot;Acc:Q80YN4]	E
ENSRNOG00000002303	-18.6389	4.08436	1.6e-36	4.22e-35	16.9635	Kcnj12	ATP-sensitive inward rectifier potassium channel 12 [Source:UniProtKB/Swiss-Prot;Acc:P52188]	E
ENSRNOG00000002305	-13.8759	-1.51036	1.42e-11	1.09e-10	-2.8488	Slc15a2	Solute carrier family 15 member 2 [Source:UniProtKB/Swiss-Prot;Acc:Q63424]	A
ENSRNOG00000002309	-18.0295	3.09287	4.17e-27	7.5e-26	8.53189	Hlx	H2.0-like homeobox protein [Source:UniProtKB/Swiss-Prot;Acc:A0JPN1]	E
ENSRNOG00000002312	-16.6093	0.893833	0.000163602	0.000635838	1.85811	Atp10d	Uncharacterized protein [Source:UniProtKB/TrEMBL;Acc:D3ZN41]	E
ENSRNOG00000002314	-12.659	-0.815678	0.000193365	0.000744833	-1.76012	Lkap	Limkain-b1 [Source:UniProtKB/Swiss-Prot;Acc:Q8VIG2]	A
ENSRNOG00000002318	-16.3998	1.25347	1.15e-07	6.39e-07	2.38414	D3ZMM9_RAT	LIM and calponin homology domains-containing protein 1 [Source:RefSeq peptide;Acc:NP_001178607]	E
ENSRNOG00000002320	-13.177	-0.685181	0.00174904	0.00581285	-1.6079	Commd8	COMM domain-containing protein 8 [Source:RefSeq peptide;Acc:NP_001099474]	A
ENSRNOG00000002321	-17.7066	-0.678086	0.0073805	0.0220928	-1.60002	RGD1563242	None	A
ENSRNOG00000002331	-19.6538	-4.95222	2.13e-42	7.13e-41	-30.9576	Aldh3a1	Aldehyde dehydrogenase, dimeric NADP-preferring [Source:UniProtKB/Swiss-Prot;Acc:P11883]	A
ENSRNOG00000002332	-17.3662	-1.24305	4.92e-07	2.56e-06	-2.36698	MSPD1_RAT	Motile sperm domain-containing protein 1 [Source:UniProtKB/Swiss-Prot;Acc:Q5RJS6]	A
ENSRNOG00000002336	-20.4715	1.70988	5.19e-05	0.000214975	3.27134	D3ZMK4_RAT	Uncharacterized protein [Source:UniProtKB/TrEMBL;Acc:D3ZMK4]	E
ENSRNOG00000002338	-15.6839	-0.749968	0.000948516	0.00329228	-1.68176	LOC497978	similar to diacylglycerol kinase epsilon (LOC497978), mRNA [Source:RefSeq DNA;Acc:NM_001039341]	A
ENSRNOG00000002341	-15.8994	-0.573696	0.0118354	0.0341053	-1.48833	Trim25	E3 ubiquitin/ISG15 ligase TRIM25 [Source:RefSeq peptide;Acc:NP_001009536]	A
ENSRNOG00000002342	-13.153	-1.79798	1.15e-15	1.14e-14	-3.47733	Aldh3a2	Fatty aldehyde dehydrogenase [Source:UniProtKB/Swiss-Prot;Acc:P30839]	A
ENSRNOG00000002343	-15.1128	3.94951	2.06e-55	1.15e-53	15.4498	Uchl1	Ubiquitin carboxyl-terminal hydrolase isozyme L1 [Source:UniProtKB/Swiss-Prot;Acc:Q00981]	E
ENSRNOG00000002345	-20.1458	2.37567	2.25e-09	1.45e-08	5.18978	LOC100361238	Uncharacterized protein [Source:UniProtKB/TrEMBL;Acc:D3ZJN7]	E
ENSRNOG00000002346	-36.2208	27.5904	0.00130666	0.00443409	2.02093e+08	Tbx22	T-box transcription factor TBX22 [Source:RefSeq peptide;Acc:NP_001100407]	E
ENSRNOG00000002349	-18.0295	5.01052	1.4e-57	8.59e-56	32.2343	Gabra2	Gamma-aminobutyric acid receptor subunit alpha-2 [Source:UniProtKB/Swiss-Prot;Acc:P23576]	E
ENSRNOG00000002355	-21.5694	-7.12644	8.48e-37	2.27e-35	-139.725	Slc47a1	Multidrug and toxin extrusion protein 1 [Source:UniProtKB/Swiss-Prot;Acc:Q5I0E9]	A
ENSRNOG00000002358	-13.5442	-1.50362	1.56e-11	1.19e-10	-2.83554	Scpep1	Retinoid-inducible serine carboxypeptidase [Source:UniProtKB/Swiss-Prot;Acc:Q920A6]	A
ENSRNOG00000002360	-18.0914	2.07766	5.46e-14	4.92e-13	4.22123	Gabrg1	Gamma-aminobutyric acid receptor subunit gamma-1 [Source:UniProtKB/Swiss-Prot;Acc:P23574]	E
ENSRNOG00000002361	-20.9046	3.25242	7.85e-12	6.13e-11	9.52963	Prkg2	cGMP-dependent protein kinase 2 [Source:UniProtKB/Swiss-Prot;Acc:Q64595]	E
ENSRNOG00000002364	-19.3559	1.80824	2.13e-08	1.26e-07	3.50214	Rnf112	RING finger protein 112 [Source:UniProtKB/Swiss-Prot;Acc:O70418]	E
ENSRNOG00000002368	-13.0939	-1.08552	8.29e-07	4.22e-06	-2.12214	D4A8P9_RAT	Uncharacterized protein [Source:UniProtKB/TrEMBL;Acc:D4A8P9]	A
ENSRNOG00000002369	-20.1432	4.04744	2.12e-22	3.04e-21	16.5349	Rgs8	Regulator of G-protein signaling 8 [Source:UniProtKB/Swiss-Prot;Acc:P49804]	E
ENSRNOG00000002372	-20.6468	3.75613	6.74e-16	6.81e-15	13.5116	Sgcd	delta-sarcoglycan b [Source:RefSeq peptide;Acc:NP_001128298]	E
ENSRNOG00000002373	-15.3416	-0.95992	2.05e-05	8.96e-05	-1.9452	Akap1	A-kinase anchor protein 1, mitochondrial [Source:UniProtKB/Swiss-Prot;Acc:O88884]	A
ENSRNOG00000002378	-12.6637	-3.06429	7.77e-39	2.26e-37	-8.36454	Bpnt1	3'(2'),5'-bisphosphate nucleotidase 1 [Source:UniProtKB/Swiss-Prot;Acc:Q9Z1N4]	A
ENSRNOG00000002379	-35.9492	28.1337	0.0008332	0.00291018	2.94494e+08	Plac1	Placenta-specific protein 1 [Source:UniProtKB/Swiss-Prot;Acc:Q4V7E2]	E
ENSRNOG00000002381	-35.4708	29.0904	3.59e-07	1.89e-06	5.71596e+08	Bmp3	Bone morphogenetic protein 3 [Source:UniProtKB/Swiss-Prot;Acc:P49002]	E
ENSRNOG00000002382	-15.4152	2.50066	7.69e-26	1.31e-24	5.65946	Mfap4	microfibril-associated glycoprotein 4 [Source:RefSeq peptide;Acc:NP_001029296]	E
ENSRNOG00000002385	-19.2547	-2.30112	3.27e-13	2.81e-12	-4.92839	Prg4	proteoglycan 4 [Source:RefSeq peptide;Acc:NP_001099432]	A
ENSRNOG00000002387	-13.9953	-1.32111	2.99e-09	1.91e-08	-2.49858	Tceal1	Transcription elongation factor A protein-like 1 [Source:UniProtKB/Swiss-Prot;Acc:Q5PPP3]	A
ENSRNOG00000002390	-12.1161	1.20864	4.08e-08	2.35e-07	2.31119	Gnb2l1	Guanine nucleotide-binding protein subunit beta-2-like 1 [Source:UniProtKB/Swiss-Prot;Acc:P63245]	E
ENSRNOG00000002396	-20.8619	-1.62232	0.000266436	0.00100451	-3.0787	Serpinb8	serpin B8 [Source:RefSeq peptide;Acc:NP_001099418]	A
ENSRNOG00000002397	-19.3127	5.13757	5.58e-44	1.97e-42	35.2015	Slc30a10	zinc transporter 10 [Source:RefSeq peptide;Acc:NP_001099455]	E
ENSRNOG00000002407	-14.375	-1.22751	3.71e-08	2.14e-07	-2.34163	Pdxdc1	pyridoxal-dependent decarboxylase domain-containing protein 1 [Source:RefSeq peptide;Acc:NP_001128433]	A
ENSRNOG00000002408	-12.3999	-0.765606	0.000458786	0.00167114	-1.70008	Rbm47	RNA-binding protein 47 [Source:UniProtKB/Swiss-Prot;Acc:Q66H68]	A
ENSRNOG00000002412	-14.9548	1.31135	6.89e-09	4.26e-08	2.48174	Mapk7	Mitogen-activated protein kinase 7 [Source:UniProtKB/Swiss-Prot;Acc:P0C865]	E
ENSRNOG00000002413	-13.6896	1.01823	4.14e-06	1.96e-05	2.02544	Gpc4	glypican-4 [Source:RefSeq peptide;Acc:NP_001014130]	E
ENSRNOG00000002415	-20.1398	4.38701	1.91e-25	3.19e-24	20.923	Ankfn1	ankyrin-repeat and fibronectin type III domain containing 1 Gene [Source:MGI Symbol;Acc:MGI:2686021]	E
ENSRNOG00000002418	-13.7861	-6.98901	1.25e-132	1.53e-129	-127.028	Tgfb2	Transforming growth factor beta-2 [Source:UniProtKB/Swiss-Prot;Acc:Q07257]	A
ENSRNOG00000002419	-15.5554	-5.07821	9.83e-81	1.61e-78	-33.7826	Plp1	Myelin proteolipid protein [Source:UniProtKB/Swiss-Prot;Acc:P60203]	A
ENSRNOG00000002420	-13.9229	-1.24325	2.2e-08	1.3e-07	-2.36732	D3ZP12_RAT	Uncharacterized protein [Source:UniProtKB/TrEMBL;Acc:D3ZP12]	A
ENSRNOG00000002428	-15.6004	3.21978	6.3e-39	1.84e-37	9.31646	Lpar4	lysophosphatidic acid receptor 4 [Source:RefSeq peptide;Acc:NP_001100410]	E
ENSRNOG00000002429	-35.6945	28.6431	1.64e-05	7.24e-05	4.19215e+08	D3ZH95_RAT	Uncharacterized protein [Source:UniProtKB/TrEMBL;Acc:D3ZH95]	E
ENSRNOG00000002434	-19.0053	2.41824	1.41e-14	1.31e-13	5.3452	Tmem100	Transmembrane protein 100 [Source:UniProtKB/Swiss-Prot;Acc:Q569C0]	E
ENSRNOG00000002439	-22.5544	5.55521	8.55e-13	7.11e-12	47.0201	Inhbb	Inhibin beta B chain [Source:UniProtKB/Swiss-Prot;Acc:P17491]	E
ENSRNOG00000002443	-15.5969	1.59544	5.85e-12	4.6e-11	3.02187	Mfap3	Microfibril-associated glycoprotein 3 [Source:UniProtKB/Swiss-Prot;Acc:Q6AYF7]	E
ENSRNOG00000002449	-12.5754	1.51651	9.02e-12	7.02e-11	2.86098	Maged2	melanoma-associated antigen D2 [Source:RefSeq peptide;Acc:NP_536727]	E
ENSRNOG00000002450	-15.3485	0.584938	0.00945371	0.0276557	1.49997	Rrp15	RRP15-like protein [Source:UniProtKB/Swiss-Prot;Acc:Q5M947]	E
ENSRNOG00000002451	-33.9072	32.2177	1.48e-36	3.91e-35	4.9946e+09	Fndc3c1	fibronectin type III domain containing protein 3C1 [Source:RefSeq peptide;Acc:NP_001178651]	E
ENSRNOG00000002453	-13.9639	-1.04739	2.24e-06	1.09e-05	-2.06679	Taf9b	Transcription initiation factor TFIID subunit 9B [Source:UniProtKB/Swiss-Prot;Acc:Q62880]	A
ENSRNOG00000002454	-13.6416	0.754598	0.000605258	0.0021656	1.68716	Rnf2	E3 ubiquitin-protein ligase RING2 [Source:UniProtKB/Swiss-Prot;Acc:Q4KLY4]	E
ENSRNOG00000002458	-14.7241	-0.690415	0.00188965	0.00624775	-1.61375	Cox11	COX11 homolog, cytochrome c oxidase assembly protein [Source:RefSeq peptide;Acc:NP_001103045]	A
ENSRNOG00000002461	-14.6932	5.66497	3.97e-96	1.15e-93	50.7371	Nid1	Nidogen-1 [Source:UniProtKB/Swiss-Prot;Acc:P08460]	E
ENSRNOG00000002462	-15.38	0.952998	2.61e-05	0.000112522	1.93589	B9D1_RAT	B9 domain-containing protein 1 [Source:UniProtKB/Swiss-Prot;Acc:P0C5J2]	E
ENSRNOG00000002467	-11.7404	-1.82273	3.66e-16	3.76e-15	-3.53749	Pgk1	Phosphoglycerate kinase 1 [Source:UniProtKB/Swiss-Prot;Acc:P16617]	A
ENSRNOG00000002469	-18.3939	-2.91277	8.87e-25	1.43e-23	-7.53063	Trim7	Uncharacterized protein [Source:UniProtKB/TrEMBL;Acc:D3ZNJ9]	A
ENSRNOG00000002470	-16.0316	-3.96613	2.55e-54	1.35e-52	-15.6287	Ifi47	interferon gamma inducible protein 47 [Source:RefSeq peptide;Acc:NP_742016]	A
ENSRNOG00000002471	-19.269	5.48243	2.28e-48	9.59e-47	44.7069	Polq	DNA polymerase theta [Source:RefSeq peptide;Acc:NP_001099348]	E
ENSRNOG00000002473	-14.9067	-2.06371	2.93e-19	3.59e-18	-4.1806	RGD1307830	Uncharacterized protein [Source:UniProtKB/TrEMBL;Acc:D3ZN01]	A
ENSRNOG00000002474	-13.9115	-0.728821	0.000935837	0.0032498	-1.65728	RGD1562626	Uncharacterized protein [Source:UniProtKB/TrEMBL;Acc:D3ZNN9]	A
ENSRNOG00000002475	-21.685	-1.49137	0.0117601	0.033898	-2.81156	RGD1565798	None	A
ENSRNOG00000002477	-16.6506	0.799649	0.000768894	0.00270512	1.74068	D4A063_RAT	Uncharacterized protein [Source:UniProtKB/TrEMBL;Acc:D4A063]	E
ENSRNOG00000002478	-13.8381	-2.14031	5.99e-21	8.01e-20	-4.40856	Insig2	Insulin-induced gene 2 protein [Source:UniProtKB/Swiss-Prot;Acc:Q80UA9]	A
ENSRNOG00000002480	-17.6938	1.82218	4.47e-12	3.55e-11	3.53616	Gpr137b	integral membrane protein GPR137B [Source:RefSeq peptide;Acc:NP_001099448]	E
ENSRNOG00000002487	-19.2872	2.19854	2.53e-11	1.91e-10	4.59014	Mbnl3	muscleblind-like protein 3 [Source:RefSeq peptide;Acc:NP_001100419]	E
ENSRNOG00000002488	-15.6401	1.95365	7.71e-17	8.27e-16	3.87353	Galnt10	Polypeptide N-acetylgalactosaminyltransferase 10 [Source:UniProtKB/Swiss-Prot;Acc:Q925R7]	E
ENSRNOG00000002495	-18.3396	-5.08635	6.97e-61	4.9e-59	-33.9738	None	None	A
ENSRNOG00000002496	-19.4306	0.882645	0.00750941	0.0224411	1.84375	Stxbp5l	Uncharacterized protein [Source:UniProtKB/TrEMBL;Acc:D3ZDG1]	E
ENSRNOG00000002504	-17.5081	-0.679031	0.00657398	0.0198357	-1.60106	Spata17		A
ENSRNOG00000002506	-15.2331	-1.50745	3.34e-11	2.49e-10	-2.84308	CDKL2_RAT	Cyclin-dependent kinase-like 2 [Source:UniProtKB/Swiss-Prot;Acc:Q5XIT0]	A
ENSRNOG00000002511	-17.935	5.27004	2.9e-62	2.13e-60	38.5868	Flt4	Vascular endothelial growth factor receptor 3 [Source:UniProtKB/Swiss-Prot;Acc:Q91ZT1]	E
ENSRNOG00000002516	-14.2241	-0.899182	4.82e-05	0.000201015	-1.86501	Mtm1	Myotubularin [Source:UniProtKB/Swiss-Prot;Acc:Q6AXQ4]	A
ENSRNOG00000002517	-36.4878	27.0566	0.0175039	0.0485142	1.39586e+08	Pdc	Phosducin [Source:UniProtKB/Swiss-Prot;Acc:P20942]	E
ENSRNOG00000002519	-13.9962	-0.945329	1.91e-05	8.35e-05	-1.92563	Magt1	Magnesium transporter protein 1 [Source:UniProtKB/Swiss-Prot;Acc:O35777]	A
ENSRNOG00000002520	-14.3698	-0.972719	1.18e-05	5.29e-05	-1.96254	Litaf	Lipopolysaccharide-induced tumor necrosis factor-alpha factor homolog [Source:UniProtKB/Swiss-Prot;Acc:P0C0T0]	A
ENSRNOG00000002525	-19.7623	2.22461	1.34e-09	8.8e-09	4.67384	Ptgs2	Prostaglandin G/H synthase 2 [Source:UniProtKB/Swiss-Prot;Acc:P35355]	E
ENSRNOG00000002535	-36.2803	27.4716	0.00248165	0.00803652	1.86113e+08	Kif2b	Kinesin-like protein KIF2B [Source:UniProtKB/Swiss-Prot;Acc:Q5XI51]	E
ENSRNOG00000002536	-12.8556	-2.5812	4.32e-29	8.41e-28	-5.98439	C1galt1c1	C1GALT1-specific chaperone 1 [Source:UniProtKB/Swiss-Prot;Acc:Q499P3]	A
ENSRNOG00000002537	-16.2108	1.18646	3.91e-07	2.05e-06	2.27594	D4A7Z8_RAT	WNK lysine deficient protein kinase 3 [Source:RefSeq peptide;Acc:NP_001157079]	E
ENSRNOG00000002542	-15.6442	1.00685	1.08e-05	4.88e-05	2.00952	Heatr6	HEAT repeat-containing protein 6 [Source:UniProtKB/Swiss-Prot;Acc:A1EC95]	E
ENSRNOG00000002545	-13.0095	-0.993368	6.23e-06	2.89e-05	-1.99083	RGD1309748	similar to CG4768-PA (RGD1309748), mRNA [Source:RefSeq DNA;Acc:NM_001106972]	A
ENSRNOG00000002548	-22.6437	5.37726	2.73e-11	2.05e-10	41.5639	D3ZK12_RAT	Uncharacterized protein [Source:UniProtKB/TrEMBL;Acc:D3ZK12]	E
ENSRNOG00000002549	-23.1911	4.2848	7.01e-06	3.24e-05	19.4919	Htr5b	5-hydroxytryptamine receptor 5B [Source:UniProtKB/Swiss-Prot;Acc:P35365]	E
ENSRNOG00000002550	-11.6317	-0.651537	0.002775	0.00891953	-1.57084	ATRX_RAT	Transcriptional regulator ATRX [Source:UniProtKB/Swiss-Prot;Acc:P70486]	A
ENSRNOG00000002553	-13.3027	-1.95518	4.65e-18	5.36e-17	-3.87765	RGD1311122	Uncharacterized protein C4orf34 homolog [Source:UniProtKB/Swiss-Prot;Acc:Q498C7]	A
ENSRNOG00000002556	-13.4892	-1.10681	5.43e-07	2.82e-06	-2.15369	B0BN59_RAT	TSR2, 20S rRNA accumulation, homolog [Source:RefSeq peptide;Acc:NP_001108499]	A
ENSRNOG00000002559	-17.6406	2.05899	4.51e-15	4.36e-14	4.16693	Cacna1a	Voltage-dependent P/Q-type calcium channel subunit alpha-1A [Source:UniProtKB/Swiss-Prot;Acc:P54282]	E
ENSRNOG00000002560	-22.6113	3.44146	2.92e-05	0.000124865	10.8638	Fgf16	Fibroblast growth factor 16 [Source:UniProtKB/Swiss-Prot;Acc:O54769]	E
ENSRNOG00000002563	-15.0199	-0.909774	4.87e-05	0.000202947	-1.87875	Mcts1	Malignant T cell-amplified sequence 1 [Source:UniProtKB/Swiss-Prot;Acc:Q4G009]	A
ENSRNOG00000002569	-14.0007	-0.723444	0.00102385	0.0035317	-1.65112	Mrps14	28S ribosomal protein S14, mitochondrial [Source:RefSeq peptide;Acc:NP_001099433]	A
ENSRNOG00000002572	-11.7742	-1.7835	1.43e-15	1.42e-14	-3.44261	Cacybp	Calcyclin-binding protein [Source:UniProtKB/Swiss-Prot;Acc:Q6AYK6]	A
ENSRNOG00000002576	-17.426	-1.48857	2.26e-09	1.46e-08	-2.80612	None	None	A
ENSRNOG00000002579	-16.7391	0.793595	0.000880006	0.00306785	1.73339	Parm1	Prostate androgen-regulated mucin-like protein 1 homolog [Source:UniProtKB/Swiss-Prot;Acc:Q6P9X9]	E
ENSRNOG00000002583	-18.3999	-2.42794	5.61e-18	6.43e-17	-5.38125	Serpinb11	serpin B11 [Source:RefSeq peptide;Acc:NP_001100637]	A
ENSRNOG00000002585	-11.646	-2.91233	7.6e-36	1.96e-34	-7.52833	Cul4b	cullin-4B [Source:RefSeq peptide;Acc:NP_001100421]	A
ENSRNOG00000002587	-16.5167	1.01208	1.85e-05	8.12e-05	2.01682	LOC498265	Uncharacterized protein C1orf112 homolog [Source:UniProtKB/Swiss-Prot;Acc:Q5XI94]	E
ENSRNOG00000002588	-14.376	-0.611415	0.00562994	0.0171913	-1.52776	Clec16a	Uncharacterized protein [Source:UniProtKB/TrEMBL;Acc:D3Z879]	A
ENSRNOG00000002593	-15.4331	-4.46372	4.75e-67	4.17e-65	-22.0655	Esrrg	Estrogen-related receptor gamma [Source:UniProtKB/Swiss-Prot;Acc:P62510]	A
ENSRNOG00000002597	-36.3801	-27.272	0.0175039	0.0485142	-1.62066e+08	None		A
ENSRNOG00000002598	-17.0475	1.83657	1.88e-13	1.64e-12	3.5716	D3ZNC5_RAT	Uncharacterized protein [Source:UniProtKB/TrEMBL;Acc:D3ZNC5]	E
ENSRNOG00000002599	-18.8995	4.23184	2.36e-36	6.19e-35	18.7893	Grap	GRB2-related adapter protein [Source:RefSeq peptide;Acc:NP_001020920]	E
ENSRNOG00000002602	-22.8114	5.04186	3.88e-09	2.45e-08	32.9421	Serpinb12	serpin B12 [Source:RefSeq peptide;Acc:NP_001129339]	E
ENSRNOG00000002609	-15.6648	-1.61894	2.03e-12	1.65e-11	-3.07149	D3ZNZ5_RAT	ERO1-like protein beta [Source:RefSeq peptide;Acc:NP_001178822]	A
ENSRNOG00000002610	-14.4368	0.771903	0.000507331	0.00183167	1.70752	Carhsp1	Calcium-regulated heat stable protein 1 [Source:UniProtKB/Swiss-Prot;Acc:Q9WU49]	E
ENSRNOG00000002615	-14.9472	-0.775733	0.000504843	0.00182314	-1.71206	Pmm2	phosphomannomutase 2 [Source:RefSeq peptide;Acc:NP_001100443]	A
ENSRNOG00000002616	-34.3039	31.4244	1.39e-25	2.34e-24	2.88187e+09	Slc5a10	sodium/glucose cotransporter 5 [Source:RefSeq peptide;Acc:NP_001100477]	E
ENSRNOG00000002618	-14.6071	3.01164	2.22e-36	5.83e-35	8.0648	Ivns1abp	influenza virus NS1A binding protein [Source:RefSeq peptide;Acc:NP_001040550]	E
ENSRNOG00000002624	-35.9911	28.0499	0.00146951	0.00494284	2.77874e+08	Edaradd		E
ENSRNOG00000002625	-15.1781	-1.50875	3.22e-11	2.4e-10	-2.84563	Ptpn4	tyrosine-protein phosphatase non-receptor type 4 [Source:RefSeq peptide;Acc:NP_001093949]	A
ENSRNOG00000002626	-20.5166	5.62991	9.51e-33	2.19e-31	49.5189	LOC100360015		E
ENSRNOG00000002627	-13.6032	1.14936	2.15e-07	1.16e-06	2.21816	Kctd3	potassium channel tetramerisation domain containing 3 [Source:RefSeq peptide;Acc:NP_001100669]	E
ENSRNOG00000002630	-13.0318	-1.21627	3.63e-08	2.1e-07	-2.32346	Cnot8	CCR4-NOT transcription complex subunit 8 [Source:RefSeq peptide;Acc:NP_001008383]	A
ENSRNOG00000002635	-15.4921	-0.778174	0.000559264	0.00200908	-1.71496	Dexi	dexamethasone-induced transcript [Source:RefSeq peptide;Acc:NP_001102496]	A
ENSRNOG00000002636	-15.2475	-3.24301	8.19e-41	2.58e-39	-9.46769	Abat	4-aminobutyrate aminotransferase, mitochondrial4-aminobutyrate aminotransferase, brain isoform4-aminobutyrate aminotransferase, liver isoform [Source:UniProtKB/Swiss-Prot;Acc:P50554]	A
ENSRNOG00000002640	-24.2321	-3.80009	0.0142315	0.040429	-13.9297	Serpinb5	Serpin B5 [Source:UniProtKB/Swiss-Prot;Acc:P70564]	A
ENSRNOG00000002645	-15.1103	0.89518	6.96e-05	0.000284241	1.85984	D3ZGD0_RAT	Uncharacterized protein [Source:UniProtKB/TrEMBL;Acc:D3ZGD0]	E
ENSRNOG00000002652	-18.9685	2.2534	4.51e-13	3.83e-12	4.76804	Garnl4	rap1 GTPase-activating protein 2 [Source:RefSeq peptide;Acc:NP_001100489]	E
ENSRNOG00000002653	-17.2378	2.81203	6.14e-27	1.1e-25	7.02272	Kcnk2	potassium channel subfamily K member 2 isoform 2 [Source:RefSeq peptide;Acc:NP_742039]	E
ENSRNOG00000002654	-14.4026	-0.761901	0.000578803	0.00207548	-1.69572	FAM120C	Uncharacterized protein [Source:UniProtKB/TrEMBL;Acc:D3ZNI4]	A
ENSRNOG00000002657	-17.3118	1.84658	3.51e-13	3e-12	3.59646	Pla2g4a	Cytosolic phospholipase A2Phospholipase A2Lysophospholipase [Source:UniProtKB/Swiss-Prot;Acc:P50393]	E
ENSRNOG00000002660	-16.6491	-1.13034	1.69e-06	8.35e-06	-2.18911	Magee1	melanoma-associated antigen E1 [Source:RefSeq peptide;Acc:NP_001073360]	A
ENSRNOG00000002664	-16.6757	3.58214	2.18e-42	7.29e-41	11.9765	Emp2	epithelial membrane protein 2 [Source:RefSeq peptide;Acc:NP_001007722]	E
ENSRNOG00000002667	-19.8521	3.80652	3.76e-23	5.57e-22	13.9919	Lamc2	laminin, gamma 2 [Source:RefSeq peptide;Acc:NP_001094110]	E
ENSRNOG00000002669	-14.0307	-0.884351	6.24e-05	0.000256092	-1.84593	RGD1307222	Uncharacterized protein [Source:UniProtKB/TrEMBL;Acc:D3ZKG9]	A
ENSRNOG00000002680	-12.5065	2.15122	2.47e-21	3.36e-20	4.44203	Lamc1	laminin, gamma 1 [Source:RefSeq peptide;Acc:NP_446418]	E
ENSRNOG00000002695	-15.4629	-0.956086	2.35e-05	0.000101883	-1.94004	Tfb2m	Dimethyladenosine transferase 2, mitochondrial [Source:UniProtKB/Swiss-Prot;Acc:Q5U2T7]	A
ENSRNOG00000002705	-12.8991	-1.14212	2.18e-07	1.18e-06	-2.20706	Vps4b	vacuolar protein sorting-associated protein 4B [Source:RefSeq peptide;Acc:NP_001020887]	A
ENSRNOG00000002708	-15.0973	0.762719	0.000682768	0.00242966	1.69669	RGD1561065	similar to mKIAA1111 protein (RGD1561065), mRNA [Source:RefSeq DNA;Acc:NM_001108253]	E
ENSRNOG00000002710	-13.2511	-1.14861	1.95e-07	1.05e-06	-2.21701	Cnst	Uncharacterized protein [Source:UniProtKB/TrEMBL;Acc:D3ZKK3]	A
ENSRNOG00000002711	-16.8533	5.45357	1.35e-77	1.98e-75	43.8215	Nuf2	Kinetochore protein Nuf2 [Source:UniProtKB/Swiss-Prot;Acc:Q6AYL9]	E
ENSRNOG00000002713	-14.6945	-1.01476	5.38e-06	2.52e-05	-2.02056	Znf672	Zinc finger protein 672 [Source:UniProtKB/Swiss-Prot;Acc:Q642B2]	A
ENSRNOG00000002721	-16.6769	-1.15344	1.07e-06	5.38e-06	-2.22444	Ndufb4	NADH dehydrogenase (ubiquinone) 1 beta subcomplex 4 [Source:RefSeq peptide;Acc:NP_001032415]	A
ENSRNOG00000002722	-12.5603	0.867477	7.51e-05	0.00030558	1.82447	Sec14l1	SEC14-like protein 1 [Source:RefSeq peptide;Acc:NP_001101779]	E
ENSRNOG00000002723	-22.3755	-1.90077	0.0105846	0.030726	-3.73413	LYAM2_RAT	E-selectin [Source:UniProtKB/Swiss-Prot;Acc:P98105]	A
ENSRNOG00000002728	-21.6665	-2.2822	8.73e-05	0.000352485	-4.86421	Btc	probetacellulin [Source:RefSeq peptide;Acc:NP_071592]	A
ENSRNOG00000002730	-15.5002	2.89059	9.07e-33	2.09e-31	7.41576	Rgs5	Regulator of G-protein signaling 5 [Source:UniProtKB/Swiss-Prot;Acc:P49800]	E
ENSRNOG00000002734	-19.9636	6.74017	8.24e-53	4.14e-51	106.904	LOC302473	None	E
ENSRNOG00000002736	-13.2393	-2.44715	1.69e-26	2.97e-25	-5.45336	Rabgap1l	rab GTPase-activating protein 1-like [Source:RefSeq peptide;Acc:NP_001100660]	A
ENSRNOG00000002737	-14.6133	0.559978	0.0115785	0.0334236	1.47425	Sh3bp5l	SH3 domain-binding protein 5-like [Source:RefSeq peptide;Acc:NP_001121053]	E
ENSRNOG00000002746	-11.2497	1.00125	4.79e-06	2.25e-05	2.00174	Fstl1	Follistatin-related protein 1 [Source:UniProtKB/Swiss-Prot;Acc:Q62632]	E
ENSRNOG00000002751	-17.7931	3.91918	1.72e-41	5.56e-40	15.1283	Zdhhc15	Palmitoyltransferase ZDHHC15 [Source:UniProtKB/Swiss-Prot;Acc:Q2TGJ4]	E
ENSRNOG00000002755	-11.137	-0.744952	0.00062807	0.00224205	-1.67592	Pafah1b1	Platelet-activating factor acetylhydrolase IB subunit alpha [Source:UniProtKB/Swiss-Prot;Acc:P63004]	A
ENSRNOG00000002759	-15.37	-0.876285	0.000100289	0.000401632	-1.83564	Lias	Lipoyl synthase, mitochondrial [Source:UniProtKB/Swiss-Prot;Acc:Q5XIH4]	A
ENSRNOG00000002764	-14.5641	-0.806498	0.000279147	0.00104854	-1.74896	D3ZL09_RAT	Uncharacterized protein [Source:UniProtKB/TrEMBL;Acc:D3Z9M1]	A
ENSRNOG00000002767	-14.72	-0.929775	3.02e-05	0.000128903	-1.90498	Dlg3	Disks large homolog 3 [Source:UniProtKB/Swiss-Prot;Acc:Q62936]	A
ENSRNOG00000002768	-23.6083	-5.04845	8.42e-07	4.28e-06	-33.0929	Tmem114	transmembrane protein 114 [Source:RefSeq peptide;Acc:NP_001128110]	A
ENSRNOG00000002773	-17.3617	2.2501	3.63e-18	4.2e-17	4.75716	Rgs4	Regulator of G-protein signaling 4 [Source:UniProtKB/Swiss-Prot;Acc:P49799]	E
ENSRNOG00000002778	-16.3607	1.34715	1.26e-08	7.6e-08	2.54409	Aatf	Protein AATF [Source:UniProtKB/Swiss-Prot;Acc:Q9QYW0]	E
ENSRNOG00000002781	-15.1365	-0.665156	0.00295377	0.00946046	-1.58574	Kdsr	3-ketodihydrosphingosine reductase [Source:RefSeq peptide;Acc:NP_001101812]	A
ENSRNOG00000002783	-18.3091	1.15097	3.71e-05	0.000156772	2.22063	Serpinc1	antithrombin-III [Source:RefSeq peptide;Acc:NP_001012027]	E
ENSRNOG00000002784	-21.6341	4.22919	1.34e-12	1.1e-11	18.7549	Pou3f4	POU domain, class 3, transcription factor 4 [Source:UniProtKB/Swiss-Prot;Acc:P62516]	E
ENSRNOG00000002790	-14.425	-0.581106	0.00857033	0.0253609	-1.496	Abcb7	ATP-binding cassette sub-family B member 7, mitochondrial [Source:UniProtKB/Swiss-Prot;Acc:Q704E8]	A
ENSRNOG00000002791	-18.038	2.24872	5.41e-16	5.49e-15	4.75262	Bcl2	Apoptosis regulator Bcl-2 [Source:UniProtKB/Swiss-Prot;Acc:P49950]	E
ENSRNOG00000002793	-20.6895	4.1238	8.52e-19	1.02e-17	17.4337	Sstr2	Somatostatin receptor type 2 [Source:UniProtKB/Swiss-Prot;Acc:P30680]	E
ENSRNOG00000002794	-19.112	-5.12934	1.19e-52	5.93e-51	-35.0015	Selp	P-selectin [Source:UniProtKB/Swiss-Prot;Acc:P98106]	A
ENSRNOG00000002797	-18.9793	2.36541	7.35e-14	6.57e-13	5.15301	Gpr156	Probable G-protein coupled receptor 156 [Source:UniProtKB/Swiss-Prot;Acc:Q8K451]	E
ENSRNOG00000002800	-17.7386	4.14535	1.45e-45	5.48e-44	17.696	Gdpd2	glycerophosphoinositol inositolphosphodiesterase GDPD2 [Source:RefSeq peptide;Acc:NP_001100414]	E
ENSRNOG00000002803	-12.7586	0.986376	7.17e-06	3.31e-05	1.9812	CNOT6_RAT	CCR4-NOT transcription complex subunit 6 [Source:UniProtKB/Swiss-Prot;Acc:Q6AXU9]	E
ENSRNOG00000002810	-19.1376	4.58589	1.25e-38	3.61e-37	24.0154	Gfpt2	Glucosamine--fructose-6-phosphate aminotransferase [isomerizing] 2 [Source:UniProtKB/Swiss-Prot;Acc:Q4KMC4]	E
ENSRNOG00000002812	-21.0201	3.98713	2.17e-15	2.13e-14	15.8579	Lhx1	LIM/homeobox protein Lhx1 [Source:UniProtKB/Swiss-Prot;Acc:P63007]	E
ENSRNOG00000002813	-14.973	-0.638455	0.00417517	0.0130755	-1.55666	Dars2	Aspartyl-tRNA synthetase, mitochondrial [Source:UniProtKB/Swiss-Prot;Acc:Q3KRD0]	A
ENSRNOG00000002814	-20.3912	-1.8744	2.1e-06	1.02e-05	-3.6665	Higd1b	HIG1 domain family member 1B [Source:RefSeq peptide;Acc:NP_001099314]	A
ENSRNOG00000002815	-11.4372	-7.06691	8.62e-138	1.27e-134	-134.076	F5	coagulation factor V [Source:RefSeq peptide;Acc:NP_001041343]	A
ENSRNOG00000002818	-12.6603	1.06632	1.25e-06	6.25e-06	2.09409	Eftud2	Eftud2 protein [Source:UniProtKB/TrEMBL;Acc:Q5EB83]	E
ENSRNOG00000002820	-35.5306	28.9709	1.06e-06	5.32e-06	5.26161e+08	LOC24906	RoBo-1 [Source:RefSeq peptide;Acc:NP_113725]	E
ENSRNOG00000002823	-13.2393	-0.819012	0.00018884	0.000728449	-1.7642	Mapk9	Mitogen-activated protein kinase 9 [Source:UniProtKB/Swiss-Prot;Acc:P49186]	A
ENSRNOG00000002826	-17.6833	-1.32514	1.77e-07	9.6e-07	-2.50558	Hsd17b7	3-keto-steroid reductase [Source:UniProtKB/Swiss-Prot;Acc:Q62904]	A
ENSRNOG00000002827	-17.9419	1.32165	5.84e-07	3.01e-06	2.49952	A2bp1	fox-1 homolog A [Source:RefSeq peptide;Acc:NP_001100444]	E
ENSRNOG00000002828	-13.1848	-1.76208	3.88e-15	3.77e-14	-3.39187	Tob1	None	A
ENSRNOG00000002829	-35.6688	28.6945	1.64e-05	7.24e-05	4.34401e+08	Ppbp	platelet basic protein [Source:RefSeq peptide;Acc:NP_714943]	E
ENSRNOG00000002832	-11.1113	-1.10064	5.15e-07	2.68e-06	-2.1445	Slc16a2	Monocarboxylate transporter 8 [Source:UniProtKB/Swiss-Prot;Acc:Q8K1P8]	A
ENSRNOG00000002833	-14.6953	0.683437	0.00211956	0.00695585	1.60596	Gsk3b	Glycogen synthase kinase-3 beta [Source:UniProtKB/Swiss-Prot;Acc:P18266]	E
ENSRNOG00000002837	-15.6668	2.45162	1.18e-24	1.89e-23	5.4703	Ier2	Immediate early response gene 2 protein [Source:UniProtKB/Swiss-Prot;Acc:Q6P7D3]	E
ENSRNOG00000002838	-14.0481	-0.644915	0.00341599	0.0108466	-1.56365	Pdzd11	PDZ domain-containing protein 11 [Source:RefSeq peptide;Acc:NP_001100415]	A
ENSRNOG00000002839	-13.6289	-3.40312	1e-45	3.82e-44	-10.5789	Slc19a2	thiamine transporter 1 [Source:RefSeq peptide;Acc:NP_001025195]	A
ENSRNOG00000002840	-9.3519	-1.18588	6.44e-08	3.65e-07	-2.27502	Atp5b	ATP synthase subunit beta, mitochondrial [Source:UniProtKB/Swiss-Prot;Acc:P10719]	A
ENSRNOG00000002844	-18.1009	0.780308	0.00366163	0.0115742	1.7175	Usp27x	Ubiquitin carboxyl-terminal hydrolase [Source:UniProtKB/TrEMBL;Acc:D3ZGB0]	E
ENSRNOG00000002848	-14.5332	-1.09069	9.96e-07	5.03e-06	-2.12975	Maoa	Amine oxidase [flavin-containing] A [Source:UniProtKB/Swiss-Prot;Acc:P21396]	A
ENSRNOG00000002852	-16.5025	-1.43724	1.05e-09	6.95e-09	-2.70803	RGD1559961	myosin XIX [Source:RefSeq peptide;Acc:NP_001157208]	A
ENSRNOG00000002855	-13.0688	-0.729712	0.00085807	0.0029942	-1.65831	Rfc1	replication factor C (activator 1) 1 [Source:RefSeq peptide;Acc:NP_445999]	A
ENSRNOG00000002860	-12.8207	-0.588084	0.00706612	0.0212228	-1.50325	RGD1309708	Uncharacterized protein C1orf114 homolog [Source:UniProtKB/Swiss-Prot;Acc:Q6AYN9]	A
ENSRNOG00000002862	-14.8661	2.43536	2.9e-25	4.82e-24	5.40898	Clcn5	H(+)/Cl(-) exchange transporter 5 [Source:UniProtKB/Swiss-Prot;Acc:P51796]	E
ENSRNOG00000002863	-20.1349	3.0119	4.64e-14	4.2e-13	8.06624	Cacna1e	Voltage-dependent R-type calcium channel subunit alpha-1E [Source:UniProtKB/Swiss-Prot;Acc:Q07652]	E
ENSRNOG00000002864	-14.1424	1.23716	2.94e-08	1.71e-07	2.35734	Nacc1	Nucleus accumbens-associated protein 1 [Source:UniProtKB/Swiss-Prot;Acc:O35260]	E
ENSRNOG00000002866	-19.3721	1.91866	1.02e-08	6.19e-08	3.7807	Rassf6	Ras association domain-containing protein 6 [Source:UniProtKB/Swiss-Prot;Acc:Q4QR82]	E
ENSRNOG00000002875	-15.3388	0.53661	0.0171975	0.0480672	1.45056	Klhl20	Kelch-like protein 20 [Source:UniProtKB/Swiss-Prot;Acc:D3Z8N4]	E
ENSRNOG00000002877	-11.1559	0.608307	0.00516672	0.0158491	1.52447	HUWE1_RAT	E3 ubiquitin-protein ligase HUWE1 [Source:UniProtKB/Swiss-Prot;Acc:P51593]	E
ENSRNOG00000002879	-15.0929	-0.734183	0.00102167	0.00352502	-1.66346	Psen2	Presenilin-2Presenilin-2 NTF subunitPresenilin-2 CTF subunit [Source:UniProtKB/Swiss-Prot;Acc:O88777]	A
ENSRNOG00000002882	-15.7905	0.627017	0.00610384	0.018508	1.54437	Zcchc2	Zinc finger CCHC domain-containing protein 2 [Source:UniProtKB/Swiss-Prot;Acc:Q498S6]	E
ENSRNOG00000002883	-16.5307	-0.65173	0.00517706	0.0158792	-1.57105	D3Z8M7_RAT	chitobiosyldiphosphodolichol beta-mannosyltransferase [Source:RefSeq peptide;Acc:NP_001101734]	A
ENSRNOG00000002884	-15.6303	-0.793042	0.00046554	0.00169407	-1.73272	Blzf1	Golgin-45 [Source:RefSeq peptide;Acc:NP_001017494]	A
ENSRNOG00000002886	-11.1995	0.888426	4.76e-05	0.000198727	1.85116	Myh10	Myosin-10 [Source:UniProtKB/Swiss-Prot;Acc:Q9JLT0]	E
ENSRNOG00000002887	-14.1569	0.870549	8.47e-05	0.000342708	1.82836	Rnf187	ring finger protein 187 [Source:RefSeq peptide;Acc:NP_001157736]	E
ENSRNOG00000002890	-15.0502	-1.90316	1.05e-16	1.11e-15	-3.74032	Ankrd45	Uncharacterized protein [Source:UniProtKB/TrEMBL;Acc:D3Z8M5]	A
ENSRNOG00000002894	-14.1447	0.642112	0.00364063	0.0115152	1.56061	Mnt	max-binding protein MNT [Source:RefSeq peptide;Acc:NP_001099277]	E
ENSRNOG00000002896	-12.1638	-1.18702	6.89e-08	3.89e-07	-2.27681	Prdx6	Peroxiredoxin-6 [Source:UniProtKB/Swiss-Prot;Acc:O35244]	A
ENSRNOG00000002899	-14.4225	-1.21858	4.74e-08	2.71e-07	-2.32718	Akap10	A kinase anchor protein 10, mitochondrial [Source:RefSeq peptide;Acc:NP_001108078]	A
ENSRNOG00000002904	-20.0406	-1.92885	1.08e-07	5.97e-07	-3.80751	Arr3	Arrestin-C [Source:UniProtKB/Swiss-Prot;Acc:P36576]	A
ENSRNOG00000002905	-17.4035	0.900546	0.000333919	0.00124209	1.86677	Ccdc103	coiled-coil domain-containing protein 103 [Source:RefSeq peptide;Acc:NP_001102519]	E
ENSRNOG00000002906	-18.7176	-4.48608	1.24e-46	4.85e-45	-22.4101	Nr1i2	Nuclear receptor subfamily 1 group I member 2 [Source:UniProtKB/Swiss-Prot;Acc:Q9R1A7]	A
ENSRNOG00000002907	-15.4665	1.65828	7.61e-13	6.36e-12	3.1564	D3ZWN0_RAT	Uncharacterized protein [Source:UniProtKB/TrEMBL;Acc:D3ZFB1]	E
ENSRNOG00000002911	-36.3842	-27.2636	0.0175039	0.0485142	-1.61126e+08	Alb	Serum albumin [Source:UniProtKB/Swiss-Prot;Acc:P02770]	A
ENSRNOG00000002914	-15.2484	0.675522	0.00264776	0.00853312	1.59717	Trmt1	N(2),N(2)-dimethylguanosine tRNA methyltransferase [Source:RefSeq peptide;Acc:NP_001013892]	E
ENSRNOG00000002916	-20.9248	-5.77174	2.49e-36	6.52e-35	-54.6346	Car4	Carbonic anhydrase 4 [Source:UniProtKB/Swiss-Prot;Acc:P48284]	A
ENSRNOG00000002919	-16.3255	-3.10838	4.91e-36	1.28e-34	-8.62414	Gfap	Glial fibrillary acidic protein [Source:UniProtKB/Swiss-Prot;Acc:P47819]	A
ENSRNOG00000002922	-18.5218	2.63735	1.05e-18	1.25e-17	6.22189	Adora2b	Adenosine receptor A2b [Source:UniProtKB/Swiss-Prot;Acc:P29276]	E
ENSRNOG00000002926	-16.67	-0.734391	0.00181587	0.0060234	-1.6637	Uap1	UDP-N-acetylhexosamine pyrophosphorylase [Source:RefSeq peptide;Acc:NP_001178859]	A
ENSRNOG00000002930	-16.5763	1.33809	2.09e-08	1.24e-07	2.52817	Ppl	periplakin [Source:RefSeq peptide;Acc:NP_001100446]	E
ENSRNOG00000002932	-13.1007	0.581699	0.0078234	0.0233026	1.49661	Wdr19	WD repeat-containing protein 19 [Source:RefSeq peptide;Acc:NP_001178608]	E
ENSRNOG00000002934	-10.9242	-6.16899	1.4e-114	8.44e-112	-71.9535	Atp1b1	Sodium/potassium-transporting ATPase subunit beta-1 [Source:UniProtKB/Swiss-Prot;Acc:P07340]	A
ENSRNOG00000002935	-13.5467	-0.902788	4.09e-05	0.000171721	-1.86968	Ankrd40	ankyrin repeat domain-containing protein 40 [Source:RefSeq peptide;Acc:NP_001128171]	A
ENSRNOG00000002941	-14.8748	-1.6747	1.65e-13	1.44e-12	-3.19254	Uhmk1	Serine/threonine-protein kinase Kist [Source:UniProtKB/Swiss-Prot;Acc:Q63285]	A
ENSRNOG00000002946	-20.4406	2.38857	1.21e-08	7.31e-08	5.23639	Socs3	Suppressor of cytokine signaling 3 [Source:UniProtKB/Swiss-Prot;Acc:O88583]	E
ENSRNOG00000002947	-19.5106	-7.24135	8.54e-76	1.16e-73	-151.309	Dpt	dermatopontin [Source:RefSeq peptide;Acc:NP_001099435]	A
ENSRNOG00000002948	-18.0187	4.36674	6.88e-47	2.71e-45	20.631	Abcc3	Canalicular multispecific organic anion transporter 2 [Source:UniProtKB/Swiss-Prot;Acc:O88563]	E
ENSRNOG00000002950	-18.5347	4.3039	1.17e-40	3.66e-39	19.7517	Lyl1	Protein lyl-1 [Source:UniProtKB/Swiss-Prot;Acc:Q66HH3]	E
ENSRNOG00000002956	-11.6394	-2.17957	6.02e-22	8.46e-21	-4.53017	Stim2	stromal interaction molecule 2 precursor [Source:RefSeq peptide;Acc:NP_001099220]	A
ENSRNOG00000002959	-16.9473	2.35357	1.45e-20	1.9e-19	5.11086	Shroom4	protein Shroom4 [Source:RefSeq peptide;Acc:NP_001178659]	E
ENSRNOG00000002963	-18.2458	2.96729	1.48e-24	2.36e-23	7.82064	C1ql1	C1q-related factor [Source:RefSeq peptide;Acc:NP_001102308]	E
ENSRNOG00000002964	-21.1419	-5.98292	7.37e-33	1.71e-31	-63.2466	Xcl1	Lymphotactin [Source:UniProtKB/Swiss-Prot;Acc:P51672]	A
ENSRNOG00000002968	-22.2329	2.19446	0.00204353	0.00672636	4.57719	Tnfsf4	Tumor necrosis factor ligand superfamily member 4 [Source:UniProtKB/Swiss-Prot;Acc:Q9Z2P3]	E
ENSRNOG00000002969	-12.6522	-2.41529	4.96e-26	8.54e-25	-5.33428	Itpkb	Inositol-trisphosphate 3-kinase B [Source:UniProtKB/Swiss-Prot;Acc:P42335]	A
ENSRNOG00000002972	-18.6251	0.718016	0.0138621	0.039509	1.64492	RGD1565283	similar to novel protein (RGD1565283), mRNA [Source:RefSeq DNA;Acc:NM_001109074]	E
ENSRNOG00000002974	-17.1063	-3.4945	1.8e-40	5.58e-39	-11.2707	Cdx4	homeobox protein CDX-4 [Source:RefSeq peptide;Acc:NP_001100412]	A
ENSRNOG00000002975	-15.3938	0.764671	0.000716488	0.00253375	1.69898	D4ACX1_RAT	Uncharacterized protein [Source:UniProtKB/TrEMBL;Acc:D4ACX1]	E
ENSRNOG00000002977	-16.0975	-0.752858	0.00106041	0.00365354	-1.68513	Ttc19	tetratricopeptide repeat protein 19 [Source:RefSeq peptide;Acc:NP_001103114]	A
ENSRNOG00000002978	-35.6453	28.7416	9.42e-06	4.28e-05	4.48822e+08	Faslg	Tumor necrosis factor ligand superfamily member 6Tumor necrosis factor ligand superfamily member 6, membrane formTumor necrosis factor ligand superfamily member 6, soluble form [Source:UniProtKB/Swiss-Prot;Acc:P36940]	E
ENSRNOG00000002980	-13.6982	-0.595356	0.00667353	0.0201052	-1.51085	LOC100360406	RCG34104, isoform CRA_aUncharacterized protein [Source:UniProtKB/TrEMBL;Acc:D3ZEM8]	A
ENSRNOG00000002981	-15.6814	3.49891	3.22e-44	1.16e-42	11.3052	Cacna1g-m1Mcwi-	Voltage-dependent T-type calcium channel subunit alpha-1G [Source:UniProtKB/Swiss-Prot;Acc:O54898]	E
ENSRNOG00000002983	-14.6896	-1.20138	8.12e-08	4.55e-07	-2.29959	Nfix	NF1-X1 protein [Source:RefSeq peptide;Acc:NP_110493]	A
ENSRNOG00000002984	-19.7745	-3.54506	7.47e-24	1.15e-22	-11.6726	Bmp15	bone morphogenetic protein 15 [Source:RefSeq peptide;Acc:NP_067702]	A
ENSRNOG00000002985	-15.6391	0.954392	2.87e-05	0.000122882	1.93776	Nos1ap	Carboxyl-terminal PDZ ligand of neuronal nitric oxide synthase protein [Source:UniProtKB/Swiss-Prot;Acc:O54960]	E
ENSRNOG00000002987	-14.9481	-1.90484	8.43e-17	9.02e-16	-3.74467	Myh2	Myosin-4 [Source:UniProtKB/Swiss-Prot;Acc:Q29RW1]	A
ENSRNOG00000002991	-17.0176	0.928542	0.00013775	0.000542518	1.90335	Srr	Serine racemase [Source:UniProtKB/Swiss-Prot;Acc:Q76EQ0]	E
ENSRNOG00000002994	-20.0424	1.42375	0.000154402	0.000602702	2.68281	Popdc2	popeye domain-containing protein 2 [Source:RefSeq peptide;Acc:NP_954544]	E
ENSRNOG00000002997	-14.7373	0.646399	0.0036734	0.0116089	1.56526	Slc9a3r2	Na(+)/H(+) exchange regulatory cofactor NHE-RF2 [Source:UniProtKB/Swiss-Prot;Acc:Q920G2]	E
ENSRNOG00000002999	-14.4469	-1.06528	1.7e-06	8.37e-06	-2.09258	RGD1359380	Transmembrane protein C3orf1 homolog [Source:UniProtKB/Swiss-Prot;Acc:Q6AY94]	A
ENSRNOG00000003003	-15.0864	-0.834474	0.000192332	0.000741143	-1.78321	Tbc1d19	TBC1 domain family member 19 [Source:RefSeq peptide;Acc:NP_001099478]	A
ENSRNOG00000003005	-19.2118	2.14883	5.84e-11	4.28e-10	4.43467	Rasgef1c	ras-GEF domain-containing family member 1C [Source:RefSeq peptide;Acc:NP_001101743]	E
ENSRNOG00000003008	-16.9235	-1.82055	6.89e-14	6.16e-13	-3.53216	D4A5V4_RAT	Uncharacterized protein [Source:UniProtKB/TrEMBL;Acc:D4A5V4]	A
ENSRNOG00000003009	-18.8329	-3.7429	7.3e-34	1.76e-32	-13.3883	LOC100361639	Uncharacterized protein [Source:UniProtKB/TrEMBL;Acc:D4A793]	A
ENSRNOG00000003018	-16.9779	3.0066	7.12e-31	1.5e-29	8.03671	Olfml2b	olfactomedin-like protein 2B [Source:RefSeq peptide;Acc:NP_001100665]	E
ENSRNOG00000003029	-8.92732	-1.09178	6.11e-07	3.15e-06	-2.13137	Calr	Calreticulin [Source:UniProtKB/Swiss-Prot;Acc:P18418]	A
ENSRNOG00000003033	-16.2533	-0.831181	0.000319941	0.00119402	-1.77914	Plcd3	1-phosphatidylinositol-4,5-bisphosphate phosphodiesterase delta-3 [Source:RefSeq peptide;Acc:NP_001099315]	A
ENSRNOG00000003038	-15.5181	-1.23971	5.03e-08	2.87e-07	-2.36151	Sft2d2	Vesicle transport protein SFT2B [Source:UniProtKB/Swiss-Prot;Acc:Q4FZV2]	A
ENSRNOG00000003039	-32.5983	34.8355	7.62e-90	1.78e-87	3.06579e+10	Wnt3a		E
ENSRNOG00000003049	-13.4824	-0.566718	0.00965769	0.0282216	-1.48115	HCD2_RAT	3-hydroxyacyl-CoA dehydrogenase type-2 [Source:UniProtKB/Swiss-Prot;Acc:O70351]	A
ENSRNOG00000003050	-12.9578	-0.526762	0.0158314	0.0446086	-1.44069	Tbc1d9b	TBC1 domain family member 9B [Source:RefSeq peptide;Acc:NP_001101744]	A
ENSRNOG00000003052	-16.3744	-1.05681	5.59e-06	2.61e-05	-2.08033	Cox18	mitochondrial inner membrane protein COX18 [Source:RefSeq peptide;Acc:NP_001099470]	A
ENSRNOG00000003063	-15.55	-1.19358	1.51e-07	8.27e-07	-2.2872	KPB1_RAT	Phosphorylase b kinase regulatory subunit alpha, skeletal muscle isoform [Source:UniProtKB/Swiss-Prot;Acc:Q64649]	A
ENSRNOG00000003066	-14.5377	1.05387	2.4e-06	1.16e-05	2.07609	Wnt9a	protein Wnt-9a [Source:RefSeq peptide;Acc:NP_001099253]	E
ENSRNOG00000003068	-17.2771	1.4114	1.89e-08	1.13e-07	2.65995	RGD1564036	similar to RIKEN cDNA 3010026O09 (RGD1564036), mRNA [Source:RefSeq DNA;Acc:NM_001109030]	E
ENSRNOG00000003069	-18.5864	2.06596	1.75e-12	1.43e-11	4.18712	Cd38	ADP-ribosyl cyclase 1 [Source:UniProtKB/Swiss-Prot;Acc:Q64244]	E
ENSRNOG00000003071	-14.7599	-2.09022	9.23e-20	1.16e-18	-4.25813	Vamp4	vesicle-associated membrane protein 4 [Source:RefSeq peptide;Acc:NP_001102326]	A
ENSRNOG00000003073	-18.2596	3.02481	8.62e-25	1.39e-23	8.13877	Gpr161	G protein-coupled receptor 161 [Source:RefSeq peptide;Acc:NP_001178601]	E
ENSRNOG00000003078	-14.1568	-1.04791	2.31e-06	1.12e-05	-2.06753	D4A8L4_RAT	Similar to IQ motif and WD repeats 1 (Predicted)Uncharacterized protein [Source:UniProtKB/TrEMBL;Acc:D4A8L4]	A
ENSRNOG00000003084	-12.8671	1.49043	2.08e-11	1.57e-10	2.80972	Parp1	Poly [ADP-ribose] polymerase 1 [Source:UniProtKB/Swiss-Prot;Acc:P27008]	E
ENSRNOG00000003088	-16.6012	4.57079	3.4e-62	2.49e-60	23.7654	Cdgap	rho GTPase-activating protein 31 [Source:RefSeq peptide;Acc:NP_001099349]	E
ENSRNOG00000003095	-18.6561	-4.16732	7.15e-42	2.34e-40	-17.9675	Fgfbp1	Fibroblast growth factor-binding protein 1 [Source:UniProtKB/Swiss-Prot;Acc:Q9QY10]	A
ENSRNOG00000003096	-18.3144	4.52965	1.26e-46	4.92e-45	23.0973	D3ZRT0_RAT	Uncharacterized protein [Source:UniProtKB/TrEMBL;Acc:D3ZRT0]	E
ENSRNOG00000003098	-15.3761	4.71133	2.42e-71	2.53e-69	26.1969	Prom1	prominin 1 isoform 2 [Source:RefSeq peptide;Acc:NP_001103607]	E
ENSRNOG00000003103	-15.2197	2.14098	4.78e-20	6.11e-19	4.41061	Lbr	Lamin-B receptor [Source:UniProtKB/Swiss-Prot;Acc:O08984]	E
ENSRNOG00000003104	-19.2375	2.37479	7.92e-13	6.61e-12	5.1866	Trpv2	Transient receptor potential cation channel subfamily V member 2 [Source:UniProtKB/Swiss-Prot;Acc:Q9WUD2]	E
ENSRNOG00000003105	-19.4723	2.00104	5.53e-09	3.45e-08	4.00289	D4A976_RAT	Uncharacterized protein [Source:UniProtKB/TrEMBL;Acc:D3ZRX8]	E
ENSRNOG00000003108	-14.9486	-1.60563	1.46e-12	1.2e-11	-3.0433	Acbd4	Acyl-CoA-binding domain-containing protein 4 [Source:UniProtKB/Swiss-Prot;Acc:Q6DGF9]	A
ENSRNOG00000003109	-17.7329	4.7026	5.5e-55	3.03e-53	26.039	Btbd17	BTB/POZ domain-containing protein 17 [Source:RefSeq peptide;Acc:NP_001128006]	E
ENSRNOG00000003116	-18.0623	1.96735	8.45e-13	7.04e-12	3.9105	Dph1	diphthamide biosynthesis protein 1 [Source:RefSeq peptide;Acc:NP_001099279]	E
ENSRNOG00000003117	-12.9928	-0.564694	0.00971921	0.0283901	-1.47907	Psmd12	26S proteasome non-ATPase regulatory subunit 12 [Source:RefSeq peptide;Acc:NP_001005875]	A
ENSRNOG00000003120	-12.9649	-5.00524	6.14e-84	1.12e-81	-32.1164	Prelp	Prolargin [Source:UniProtKB/Swiss-Prot;Acc:Q9EQP5]	A
ENSRNOG00000003121	-12.8895	-2.00511	6.4e-19	7.7e-18	-4.01418	Rtn4rl1	Reticulon-4 receptor-like 1 [Source:UniProtKB/Swiss-Prot;Acc:Q80WD0]	A
ENSRNOG00000003123	-13.0224	-1.01884	3.6e-06	1.72e-05	-2.02629	Rpa1	replication protein A 70 kDa DNA-binding subunit [Source:RefSeq peptide;Acc:NP_001041308]	A
ENSRNOG00000003127	-16.4628	0.608167	0.00956251	0.0279628	1.52432	Spryd4	SPRY domain-containing protein 4 [Source:UniProtKB/Swiss-Prot;Acc:Q4FZT8]	E
ENSRNOG00000003129	-15.4496	1.10664	1.2e-06	6e-06	2.15343	Znf496		E
ENSRNOG00000003131	-14.5294	0.849524	0.000133502	0.000526207	1.80191	Traf7	E3 ubiquitin-protein ligase TRAF7 [Source:RefSeq peptide;Acc:NP_001121020]	E
ENSRNOG00000003132	-17.1169	4.91345	8.74e-65	6.93e-63	30.1368	Mip	Lens fiber major intrinsic protein [Source:UniProtKB/Swiss-Prot;Acc:P09011]	E
ENSRNOG00000003134	-16.794	1.95953	1.49e-15	1.48e-14	3.88934	Slc4a4	Electrogenic sodium bicarbonate cotransporter 1 [Source:UniProtKB/Swiss-Prot;Acc:Q9JI66]	E
ENSRNOG00000003147	-11.8474	-0.867618	7.18e-05	0.000292834	-1.82465	SQSTM_RAT	Sequestosome-1 [Source:UniProtKB/Swiss-Prot;Acc:O08623]	A
ENSRNOG00000003148	-12.5431	-3.47439	9.49e-48	3.88e-46	-11.1146	TIMP2_RAT	Metalloproteinase inhibitor 2 [Source:UniProtKB/Swiss-Prot;Acc:P30121]	A
ENSRNOG00000003149	-14.2303	0.679586	0.00211359	0.0069399	1.60168	Farsa	Phenylalanyl-tRNA synthetase alpha chain [Source:UniProtKB/Swiss-Prot;Acc:Q505J8]	E
ENSRNOG00000003150	-14.6816	-1.54681	7.25e-12	5.68e-11	-2.9217	D4A0Q0_RAT	Uncharacterized protein [Source:UniProtKB/TrEMBL;Acc:D4A0Q0]	A
ENSRNOG00000003160	-15.2137	-0.535796	0.0168235	0.0471335	-1.44974	RragB	Ras-related GTP-binding protein B [Source:UniProtKB/Swiss-Prot;Acc:Q63487]	A
ENSRNOG00000003163	-12.2394	-1.52877	5.69e-12	4.48e-11	-2.8854	Sdhc	succinate dehydrogenase complex, subunit C [Source:RefSeq peptide;Acc:NP_001005534]	A
ENSRNOG00000003170	-19.654	1.44452	4.01e-05	0.000168797	2.72173	Nlrp3	NACHT, LRR and PYD domains-containing protein 3 [Source:RefSeq peptide;Acc:NP_001178571]	E
ENSRNOG00000003172	-16.9276	3.04704	8.43e-32	1.85e-30	8.26516	Serpinf1	pigment epithelium-derived factor [Source:RefSeq peptide;Acc:NP_808788]	E
ENSRNOG00000003177	-13.0656	-2.44553	1.64e-26	2.89e-25	-5.44727	MGC94725	Methionine adenosyltransferase 2 subunit beta [Source:UniProtKB/Swiss-Prot;Acc:Q5U2R0]	A
ENSRNOG00000003181	-16.7781	0.896157	0.000184815	0.000714043	1.8611	None		E
ENSRNOG00000003183	-11.6832	-4.84456	1.43e-80	2.28e-78	-28.7315	Fmod	Fibromodulin [Source:UniProtKB/Swiss-Prot;Acc:P50609]	A
ENSRNOG00000003186	-15.4932	-0.649005	0.00397541	0.012491	-1.56809	Anks3	Ankyrin repeat and SAM domain-containing protein 3 [Source:UniProtKB/Swiss-Prot;Acc:Q5M9H0]	A
ENSRNOG00000003189	-19.8631	4.02939	1.03e-24	1.65e-23	16.3293	Cited1	cbp/p300-interacting transactivator 1 [Source:RefSeq peptide;Acc:NP_742052]	E
ENSRNOG00000003192	-36.3461	27.3399	0.00473594	0.0146113	1.69871e+08	LOC100364984	RCG35079, isoform CRA_bUncharacterized protein [Source:UniProtKB/TrEMBL;Acc:D4A0G7]	E
ENSRNOG00000003201	-21.5806	1.88094	0.000993548	0.00343362	3.68316	LOC100362640	40S ribosomal protein S4, X isoform [Source:UniProtKB/Swiss-Prot;Acc:P62703]	E
ENSRNOG00000003202	-14.933	1.91556	9.19e-17	9.81e-16	3.7726	D4A2M9_RAT	Uncharacterized protein [Source:UniProtKB/TrEMBL;Acc:D3ZE18]	E
ENSRNOG00000003203	-12.7641	-1.97272	2.07e-18	2.42e-17	-3.92507	Hexim1	Protein HEXIM1 [Source:UniProtKB/Swiss-Prot;Acc:Q5M9G1]	A
ENSRNOG00000003205	-16.127	3.7389	8.52e-48	3.5e-46	13.3512	Ldb2	LIM domain-binding protein 2 [Source:RefSeq peptide;Acc:NP_001099479]	E
ENSRNOG00000003208	-17.922	6.8132	1.82e-88	4.03e-86	112.454	Ercc6l	similar to SNF2/RAD54 family protein [Source:RefSeq peptide;Acc:NP_001092144]	E
ENSRNOG00000003209	-13.5688	-2.85634	2.76e-34	6.75e-33	-7.24174	Pcp4l1	Purkinje cell protein 4-like protein 1 [Source:RefSeq peptide;Acc:NP_001119565]	A
ENSRNOG00000003211	-13.3586	-1.15405	1.76e-07	9.57e-07	-2.22538	Srp9	signal recognition particle 9 kDa protein [Source:RefSeq peptide;Acc:NP_001119567]	A
ENSRNOG00000003214	-15.84	0.750952	0.00101934	0.00351905	1.6829	Mmgt2	Membrane magnesium transporter 2 [Source:UniProtKB/Swiss-Prot;Acc:Q6P719]	E
ENSRNOG00000003217	-12.987	-5.93176	3.16e-107	1.45e-104	-61.0432	Lgals3bp	Galectin-3-binding protein [Source:UniProtKB/Swiss-Prot;Acc:O70513]	A
ENSRNOG00000003218	-17.3255	1.19311	1.82e-06	8.93e-06	2.28645	Znf286a	zinc finger protein 286A [Source:RefSeq peptide;Acc:NP_001178850]	E
ENSRNOG00000003219	-18.0877	-1.85158	3.22e-12	2.58e-11	-3.60895	Trim16	tripartite motif protein 16 [Source:RefSeq peptide;Acc:NP_001128505]	A
ENSRNOG00000003221	-21.4497	-2.71832	2.12e-07	1.14e-06	-6.58108	Myoc	Myocilin [Source:UniProtKB/Swiss-Prot;Acc:Q9R1J4]	A
ENSRNOG00000003223	-11.4304	-1.36242	6.62e-10	4.47e-09	-2.57115	Degs1	Sphingolipid delta(4)-desaturase DES1 [Source:UniProtKB/Swiss-Prot;Acc:Q5XIF5]	A
ENSRNOG00000003224	-14.485	0.816992	0.000237886	0.000902643	1.76173	Nudt16l1	protein syndesmos [Source:RefSeq peptide;Acc:NP_001094252]	E
ENSRNOG00000003229	-12.1775	-0.921994	2.53e-05	0.000109127	-1.89473	Tspan7	tetraspanin-7 [Source:RefSeq peptide;Acc:NP_001102285]	A
ENSRNOG00000003232	-13.9113	-1.29318	6.03e-09	3.75e-08	-2.45068	Slc9a3r1	Na(+)/H(+) exchange regulatory cofactor NHE-RF1 [Source:UniProtKB/Swiss-Prot;Acc:Q9JJ19]	A
ENSRNOG00000003233	-35.9154	28.2014	0.000472894	0.00171638	3.08642e+08	Serpinf2	alpha-2-antiplasmin precursor [Source:RefSeq peptide;Acc:NP_001011892]	E
ENSRNOG00000003242	-11.9113	-2.1811	5.95e-22	8.36e-21	-4.53501	Gulp1	PTB domain-containing engulfment adapter protein 1 [Source:UniProtKB/Swiss-Prot;Acc:Q5PQS4]	A
ENSRNOG00000003247	-15.1207	0.553211	0.0134419	0.0383931	1.46735	RGD1305572	UPF0667 protein C1orf55 homolog [Source:UniProtKB/Swiss-Prot;Acc:Q5BJN8]	E
ENSRNOG00000003248	-13.955	2.15269	5.47e-21	7.32e-20	4.44655	Mpzl1	Myelin protein zero-like protein 1 [Source:UniProtKB/Swiss-Prot;Acc:Q6AYT8]	E
ENSRNOG00000003251	-17.6968	0.679978	0.00758211	0.0226273	1.60211	B3galt2	beta-1,3-galactosyltransferase 2 [Source:RefSeq peptide;Acc:NP_001102962]	E
ENSRNOG00000003254	-20.4849	-1.03308	0.013811	0.0393822	-2.04639	Il23a	Interleukin-23 subunit alpha [Source:UniProtKB/Swiss-Prot;Acc:Q91Z84]	A
ENSRNOG00000003256	-10.6749	-1.34435	1.06e-09	6.99e-09	-2.53917	Ccng1	Cyclin-G1 [Source:UniProtKB/Swiss-Prot;Acc:P39950]	A
ENSRNOG00000003262	-19.1762	5.41051	1.5e-49	6.67e-48	42.5329	Cacng4	Voltage-dependent calcium channel gamma-4 subunit [Source:UniProtKB/Swiss-Prot;Acc:Q8VHW9]	E
ENSRNOG00000003268	-14.442	1.3568	1.54e-09	1.01e-08	2.56117	Maml1	mastermind-like protein 1 [Source:RefSeq peptide;Acc:NP_001100467]	E
ENSRNOG00000003269	-13.451	-2.86126	2.01e-34	4.93e-33	-7.26648	Atp6v0e1	V-type proton ATPase subunit e 1 [Source:UniProtKB/Swiss-Prot;Acc:Q794C0]	A
ENSRNOG00000003272	-18.8522	1.71995	1.65e-08	9.89e-08	3.29425	Gpr173	None	E
ENSRNOG00000003273	-21.525	4.45023	1.53e-14	1.43e-13	21.8602	Spata20	Spermatogenesis-associated protein 20 [Source:UniProtKB/Swiss-Prot;Acc:Q6T393]	E
ENSRNOG00000003276	-13.4567	-2.88238	7.45e-35	1.87e-33	-7.37367	Myo1d	Myosin-Id [Source:UniProtKB/Swiss-Prot;Acc:Q63357]	A
ENSRNOG00000003278	-16.8418	-0.837226	0.00042705	0.00156219	-1.78661	Map3k14	mitogen-activated protein kinase kinase kinase 14 [Source:RefSeq peptide;Acc:NP_001101771]	A
ENSRNOG00000003279	-18.3445	-1.58207	5.89e-09	3.67e-08	-2.99399	Syce2	synaptonemal complex central element protein 2 [Source:RefSeq peptide;Acc:NP_001178486]	A
ENSRNOG00000003283	-17.2845	3.83737	1.39e-43	4.86e-42	14.2943	Rcsd1	capZ-interacting protein [Source:RefSeq peptide;Acc:NP_001101819]	E
ENSRNOG00000003284	-13.4446	-3.64993	2.46e-51	1.15e-49	-12.5527	Epn3	Epsin-3 [Source:UniProtKB/Swiss-Prot;Acc:Q4V882]	A
ENSRNOG00000003285	-19.1864	1.08276	0.000549214	0.00197563	2.11808	LOC100362572	Mpv17 transgene, kidney disease mutant-like (Predicted), isoform CRA_bUncharacterized protein [Source:UniProtKB/TrEMBL;Acc:D4A908]	E
ENSRNOG00000003287	-18.793	-0.862347	0.00272065	0.00875091	-1.81799	Fbxw10	F-box and WD-40 domain protein 10 [Source:RefSeq peptide;Acc:NP_001013990]	A
ENSRNOG00000003289	-14.1876	-0.586861	0.0077517	0.0230961	-1.50197	Lap3	Cytosol aminopeptidase [Source:UniProtKB/Swiss-Prot;Acc:Q68FS4]	A
ENSRNOG00000003290	-14.1015	1.07531	1.32e-06	6.56e-06	2.10718	D3ZGV8_RAT	Uncharacterized protein [Source:UniProtKB/TrEMBL;Acc:D3ZGV8]	E
ENSRNOG00000003296	-17.8684	2.97108	3.25e-26	5.63e-25	7.84122	Dck	Deoxycytidine kinase [Source:UniProtKB/Swiss-Prot;Acc:P48769]	E
ENSRNOG00000003298	-36.4146	27.2028	0.00908224	0.0266536	1.5448e+08	Cd247	T-cell surface glycoprotein CD3 zeta chain [Source:RefSeq peptide;Acc:NP_740770]	E
ENSRNOG00000003300	-15.1998	0.999377	9.67e-06	4.39e-05	1.99914	Btg2	Protein BTG2 [Source:UniProtKB/Swiss-Prot;Acc:P27049]	E
ENSRNOG00000003302	-13.5771	-1.22697	3.04e-08	1.77e-07	-2.34075	Flcn	Folliculin [Source:UniProtKB/Swiss-Prot;Acc:Q76JQ2]	A
ENSRNOG00000003307	-14.206	-1.62046	5.74e-13	4.83e-12	-3.07474	Gcdh	glutaryl-CoA dehydrogenase, mitochondrial [Source:RefSeq peptide;Acc:NP_001102366]	A
ENSRNOG00000003308	-19.807	3.65328	3.13e-21	4.24e-20	12.5819	LOC689105	Uncharacterized protein [Source:UniProtKB/TrEMBL;Acc:D4A4Z7]	E
ENSRNOG00000003310	-17.6661	-4.39727	2.77e-54	1.46e-52	-21.0722	Tmem6	transmembrane protein 6 [Source:RefSeq peptide;Acc:NP_001127968]	A
ENSRNOG00000003312	-18.8737	-6.01882	9.83e-70	9.92e-68	-64.8404	Chi3l1	Chitinase-3-like protein 1 [Source:UniProtKB/Swiss-Prot;Acc:Q9WTV1]	A
ENSRNOG00000003324	-15.3331	1.43984	3.19e-10	2.21e-09	2.71292	None	None	E
ENSRNOG00000003326	-13.631	-0.547773	0.0124969	0.0358572	-1.46183	Rrn3	RNA polymerase I-specific transcription initiation factor RRN3 [Source:RefSeq peptide;Acc:NP_001129318]	A
ENSRNOG00000003327	-20.8835	-1.20318	0.00916504	0.0268779	-2.30247	None	None	A
ENSRNOG00000003328	-13.0903	-0.535344	0.0142844	0.0405674	-1.44929	RGD1310686	LITAF-like protein [Source:UniProtKB/Swiss-Prot;Acc:Q5U2U6]	A
ENSRNOG00000003334	-13.9779	-1.45737	6.93e-11	5.05e-10	-2.74607	Klhl21	Kelch-like protein 21 [Source:UniProtKB/Swiss-Prot;Acc:D4A2K4]	A
ENSRNOG00000003338	-15.6385	-0.65232	0.00394581	0.0124073	-1.57169	Pmp22	Peripheral myelin protein 22 [Source:UniProtKB/Swiss-Prot;Acc:P25094]	A
ENSRNOG00000003341	-15.1545	0.630201	0.00501913	0.015422	1.54778	RGD1563669	similar to Mediator of RNA polymerase II transcription, subunit 9 homolog (RGD1563669), mRNA [Source:RefSeq DNA;Acc:NM_001127302]	E
ENSRNOG00000003342	-21.9382	-2.38282	9.39e-05	0.000377613	-5.21556	D4ABZ8_RAT	Uncharacterized protein [Source:UniProtKB/TrEMBL;Acc:D4ABZ8]	A
ENSRNOG00000003343	-9.05597	-1.6096	3.9e-13	3.33e-12	-3.05166	CALX_RAT	Calnexin [Source:UniProtKB/Swiss-Prot;Acc:P35565]	A
ENSRNOG00000003348	-18.5372	-2.93682	2.04e-24	3.24e-23	-7.6572	Rasd1	Dexamethasone-induced Ras-related protein 1 [Source:UniProtKB/Swiss-Prot;Acc:Q9JKF8]	A
ENSRNOG00000003349	-15.6248	0.590454	0.00923086	0.0270493	1.50572	Col23a1	Collagen alpha-1(XXIII) chain [Source:UniProtKB/Swiss-Prot;Acc:Q810Y4]	E
ENSRNOG00000003350	-12.0642	-3.30065	5.05e-44	1.79e-42	-9.85358	Mospd2	motile sperm domain-containing protein 2 [Source:RefSeq peptide;Acc:NP_001128060]	A
ENSRNOG00000003357	-12.3633	4.42444	8.33e-70	8.47e-68	21.4729	Col3a1	Collagen alpha-1(III) chain [Source:UniProtKB/Swiss-Prot;Acc:P13941]	E
ENSRNOG00000003365	-17.5438	2.8403	2.59e-26	4.52e-25	7.16168	Cadm3	Cell adhesion molecule 3 [Source:UniProtKB/Swiss-Prot;Acc:Q1WIM3]	E
ENSRNOG00000003367	-17.8667	-2.44262	2.54e-20	3.3e-19	-5.43626	Tmem220	Uncharacterized protein [Source:UniProtKB/TrEMBL;Acc:D4A6Z7]	A
ENSRNOG00000003368	-14.4853	-2.05805	2.26e-19	2.8e-18	-4.16424	Tspyl2	testis-specific Y-encoded-like protein 2 [Source:RefSeq peptide;Acc:NP_001178547]	A
ENSRNOG00000003370	-16.9779	-2.91731	9.29e-31	1.94e-29	-7.55435	Otc	Ornithine carbamoyltransferase, mitochondrial [Source:UniProtKB/Swiss-Prot;Acc:P00481]	A
ENSRNOG00000003374	-18.6316	3.22822	3.21e-25	5.31e-24	9.37108	Ccdc85a	coiled-coil domain-containing protein 85A [Source:RefSeq peptide;Acc:NP_001178482]	E
ENSRNOG00000003384	-36.4144	27.2033	0.00908224	0.0266536	1.54524e+08	Hs3st3b1	heparan sulfate glucosamine 3-O-sulfotransferase 3B1 [Source:RefSeq peptide;Acc:NP_001178575]	E
ENSRNOG00000003385	-14.616	-0.921015	3.47e-05	0.000146616	-1.89345	GLRX2_RAT	Glutaredoxin-2, mitochondrial [Source:UniProtKB/Swiss-Prot;Acc:Q6AXW1]	A
ENSRNOG00000003386	-19.3668	2.77365	2.92e-16	3.02e-15	6.83837	Hrnbp3	similar to ataxin 2-binding protein 1 isoform 2 (RGD1560070), mRNA [Source:RefSeq DNA;Acc:NM_001134498]	E
ENSRNOG00000003387	-18.3079	0.883389	0.00137382	0.00464648	1.8447	Fdxr	NADPH:adrenodoxin oxidoreductase, mitochondrial [Source:UniProtKB/Swiss-Prot;Acc:P56522]	E
ENSRNOG00000003388	-14.9709	6.92647	1.7e-124	1.48e-121	121.64	Cenpf	centromere protein F [Source:RefSeq peptide;Acc:NP_001094297]	E
ENSRNOG00000003392	-12.0648	-1.12528	3.03e-07	1.61e-06	-2.18144	Grsf1	G-rich RNA sequence binding factor 1 [Source:RefSeq peptide;Acc:NP_001094360]	A
ENSRNOG00000003397	-16.2138	-0.953963	3.73e-05	0.00015745	-1.93719	RGD1309906	Manganese-dependent ADP-ribose/CDP-alcohol diphosphatase [Source:UniProtKB/Swiss-Prot;Acc:Q5M886]	A
ENSRNOG00000003400	-17.6586	0.629625	0.012799	0.0366597	1.54716	Fmo4	Dimethylaniline monooxygenase [N-oxide-forming] 4 [Source:UniProtKB/Swiss-Prot;Acc:Q8K4B7]	E
ENSRNOG00000003407	-14.7945	1.12744	5.24e-07	2.72e-06	2.18471	Ptpn14	tyrosine-protein phosphatase non-receptor type 14 [Source:RefSeq peptide;Acc:NP_001100670]	E
ENSRNOG00000003409	-20.2532	4.53771	1.84e-25	3.07e-24	23.2266	Ldoc1	Uncharacterized protein [Source:UniProtKB/TrEMBL;Acc:D3ZTE6]	E
ENSRNOG00000003417	-32.9851	34.0618	1.5e-71	1.61e-69	1.79322e+10	D3ZLZ6_RAT	Uncharacterized protein [Source:UniProtKB/TrEMBL;Acc:D3ZLZ6]	E
ENSRNOG00000003426	-12.9104	0.580589	0.00789348	0.0234995	1.49546	D3ZL99_RAT	Uncharacterized protein [Source:UniProtKB/TrEMBL;Acc:D3ZL99]	E
ENSRNOG00000003428	-14.8305	0.732802	0.00102227	0.00352668	1.66186	Rufy3	Protein RUFY3 [Source:UniProtKB/Swiss-Prot;Acc:Q5FVJ0]	E
ENSRNOG00000003435	-22.5978	5.46835	4.76e-12	3.77e-11	44.273	Mcf2		E
ENSRNOG00000003439	-19.4543	-1.4337	9.17e-06	4.18e-05	-2.70138	Il15	Interleukin-15 [Source:UniProtKB/Swiss-Prot;Acc:P97604]	A
ENSRNOG00000003443	-19.3156	4.64328	1.97e-37	5.4e-36	24.99	Klf1	Krueppel-like factor 1 [Source:RefSeq peptide;Acc:NP_001100634]	E
ENSRNOG00000003453	-18.8111	2.35286	1.12e-14	1.05e-13	5.10835	Lypd1	Ly6/PLAUR domain-containing protein 1 [Source:UniProtKB/Swiss-Prot;Acc:Q66H42]	E
ENSRNOG00000003455	-16.0338	-1.31199	1.38e-08	8.31e-08	-2.48285	Zfp13	zinc finger protein 13 [Source:RefSeq peptide;Acc:NP_001099235]	A
ENSRNOG00000003457	-23.0887	-2.91659	0.00210603	0.00691817	-7.55058	Ccdc64b	bicaudal D-related protein 2 [Source:RefSeq peptide;Acc:NP_001100452]	A
ENSRNOG00000003463	-12.1519	-1.15328	1.56e-07	8.55e-07	-2.22419	Srebf1	Sterol regulatory element-binding protein 1Processed sterol regulatory element-binding protein 1 [Source:UniProtKB/Swiss-Prot;Acc:P56720]	A
ENSRNOG00000003469	-19.2206	0.82833	0.0088157	0.0260477	1.77563	MAST1	Microtubule-associated serine/threonine-protein kinase 1 [Source:UniProtKB/Swiss-Prot;Acc:Q810W7]	E
ENSRNOG00000003470	-13.6898	-1.53309	6.84e-12	5.36e-11	-2.89404	Fundc1	FUN14 domain-containing protein 1 [Source:UniProtKB/Swiss-Prot;Acc:Q5BJS4]	A
ENSRNOG00000003472	-11.5356	-3.66304	3.21e-52	1.57e-50	-12.6673	Atp11c-ps1	Uncharacterized protein [Source:UniProtKB/TrEMBL;Acc:D3Z9J3]	A
ENSRNOG00000003476	-21.1778	5.1446	1.12e-21	1.56e-20	35.3737	Slc6a4	Sodium-dependent serotonin transporter [Source:UniProtKB/Swiss-Prot;Acc:P31652]	E
ENSRNOG00000003479	-17.7608	-1.82224	1.43e-12	1.17e-11	-3.5363	Rnf150	RING finger protein 150 [Source:RefSeq peptide;Acc:NP_001178022]	A
ENSRNOG00000003491	-15.8002	1.91134	4.77e-16	4.87e-15	3.76157	Prkca	Protein kinase C alpha type [Source:UniProtKB/Swiss-Prot;Acc:P05696]	E
ENSRNOG00000003492	-13.2949	-1.7785	2.3e-15	2.26e-14	-3.4307	Gas7	Growth arrest-specific protein 7 [Source:UniProtKB/Swiss-Prot;Acc:O55148]	A
ENSRNOG00000003493	-17.2975	1.10066	9.82e-06	4.46e-05	2.14452	Prp2l1	Rat proline-rich protein (PRP-1) [Source:UniProtKB/TrEMBL;Acc:Q63455]	E
ENSRNOG00000003494	-17.5574	1.33715	1.77e-07	9.61e-07	2.52651	Ppfia4	Liprin-alpha-4 [Source:UniProtKB/Swiss-Prot;Acc:Q91Z80]	E
ENSRNOG00000003496	-9.69445	-1.11818	3.32e-07	1.76e-06	-2.17074	RGD1308221	TBC1 domain family member 9 [Source:RefSeq peptide;Acc:NP_001128011]	A
ENSRNOG00000003505	-17.2921	-0.604397	0.0135388	0.038651	-1.52034	D3ZSJ9_RAT	Uncharacterized protein [Source:UniProtKB/TrEMBL;Acc:D3ZSJ9]	A
ENSRNOG00000003506	-12.9469	-0.6219	0.0044306	0.0138182	-1.5389	Gosr2	Golgi SNAP receptor complex member 2 [Source:UniProtKB/Swiss-Prot;Acc:O35165]	A
ENSRNOG00000003508	-14.7228	1.00034	7.87e-06	3.62e-05	2.00047	LOC100364400		E
ENSRNOG00000003510	-19.0479	-1.77966	4.83e-09	3.03e-08	-3.43344	Fmo2	Dimethylaniline monooxygenase [N-oxide-forming] 2 [Source:UniProtKB/Swiss-Prot;Acc:Q6IRI9]	A
ENSRNOG00000003515	-13.1326	-2.55115	1.82e-28	3.44e-27	-5.86103	Ephx1	Epoxide hydrolase 1 [Source:UniProtKB/Swiss-Prot;Acc:P07687]	A
ENSRNOG00000003517	-19.4722	5.38662	1.4e-44	5.11e-43	41.8345	Tbx2	T-box 2 Gene [Source:MGI Symbol;Acc:MGI:98494]	E
ENSRNOG00000003522	-18.1682	-3.12094	4.46e-29	8.68e-28	-8.69956	Mr1	Major histocompatibility complex class I-related gene protein [Source:UniProtKB/Swiss-Prot;Acc:O19477]	A
ENSRNOG00000003523	-15.883	1.3346	9.15e-09	5.6e-08	2.52206	D3ZB37_RAT	Uncharacterized protein [Source:UniProtKB/TrEMBL;Acc:D3ZB37]	E
ENSRNOG00000003524	-13.0828	1.76274	4.08e-15	3.95e-14	3.39343	Lrrc59	Leucine-rich repeat-containing protein 59 [Source:UniProtKB/Swiss-Prot;Acc:Q5RJR8]	E
ENSRNOG00000003526	-18.5491	0.841866	0.00327801	0.0104321	1.79237	Sytl4	Synaptotagmin-like protein 4 [Source:UniProtKB/Swiss-Prot;Acc:Q8VHQ7]	E
ENSRNOG00000003533	-14.2403	-2.33125	4.52e-24	7.04e-23	-5.03242	Clcn4-2	H(+)/Cl(-) exchange transporter 4 [Source:UniProtKB/Swiss-Prot;Acc:P51794]	A
ENSRNOG00000003536	-14.8052	-0.731299	0.00101379	0.00350071	-1.66013	Rufy1	RUN and FYVE domain containing 1 [Source:RefSeq peptide;Acc:NP_001094197]	A
ENSRNOG00000003537	-17.2394	5.34123	9.74e-72	1.06e-69	40.5388	Spta1-Tn(sb-T2/Bart3)2.315Mcwi-	spectrin alpha chain, erythrocyte [Source:RefSeq peptide;Acc:NP_001011908]	E
ENSRNOG00000003538	-19.8702	1.51068	4.2e-05	0.000175971	2.84944	D4A0C5_RAT	Uncharacterized protein [Source:UniProtKB/TrEMBL;Acc:D4A0C5]	E
ENSRNOG00000003542	-13.6394	-1.58343	1.43e-12	1.17e-11	-2.99681	Hcfc1r1	host cell factor C1 regulator 1 [Source:RefSeq peptide;Acc:NP_001093962]	A
ENSRNOG00000003544	-22.1921	3.10744	6.76e-06	3.13e-05	8.61852	Tbx4	T-box transcription factor TBX4 [Source:RefSeq peptide;Acc:NP_001100504]	E
ENSRNOG00000003545	-15.2623	-0.801578	0.000355056	0.00131541	-1.74301	Uchl5	ubiquitin carboxyl-terminal hydrolase isozyme L5 [Source:RefSeq peptide;Acc:NP_001012149]	A
ENSRNOG00000003546	-16.6345	-1.14861	1.11e-06	5.6e-06	-2.217	Tnfrsf12a	tumor necrosis factor receptor superfamily member 12A [Source:RefSeq peptide;Acc:NP_851600]	A
ENSRNOG00000003549	-13.208	-1.15519	1.66e-07	9.08e-07	-2.22714	Cnpy2	protein canopy homolog 2 [Source:RefSeq peptide;Acc:NP_001071053]	A
ENSRNOG00000003550	-14.2358	-0.628103	0.00438302	0.0136886	-1.54553	Acbd6	Acyl-CoA-binding domain-containing protein 6 [Source:UniProtKB/Swiss-Prot;Acc:Q5RJK8]	A
ENSRNOG00000003551	-15.2749	0.578191	0.0100012	0.0291473	1.49298	B4galt3	Beta-1,4-galactosyltransferase 3N-acetyllactosamine synthaseBeta-N-acetylglucosaminylglycopeptide beta-1,4-galactosyltransferaseBeta-N-acetylglucosaminyl-glycolipid beta-1,4-galactosyltransferase [Source:UniProtKB/Swiss-Prot;Acc:Q6P768]	E
ENSRNOG00000003554	-16.8763	1.1369	2.81e-06	1.36e-05	2.19908	Piga	phosphatidylinositol glycan anchor biosynthesis, class A [Source:RefSeq peptide;Acc:NP_001102286]	E
ENSRNOG00000003562	-17.6709	3.43464	1.73e-34	4.26e-33	10.8126	Susd4	sushi domain-containing protein 4 [Source:RefSeq peptide;Acc:NP_001099452]	E
ENSRNOG00000003563	-13.817	1.18653	9.3e-08	5.18e-07	2.27605	Blmh	Bleomycin hydrolase [Source:UniProtKB/Swiss-Prot;Acc:P70645]	E
ENSRNOG00000003572	-18.4659	1.41175	6.98e-07	3.58e-06	2.66059	Adamts2	A disintegrin and metalloproteinase with thrombospondin motifs 2 [Source:RefSeq peptide;Acc:NP_001131094]	E
ENSRNOG00000003574	-18.8985	2.38547	1.45e-14	1.36e-13	5.22513	Fmn2	formin 2 Gene [Source:MGI Symbol;Acc:MGI:1859252]	E
ENSRNOG00000003576	-15.1536	0.930316	3.64e-05	0.000153822	1.90569	Ints2	integrator complex subunit 2 Gene [Source:MGI Symbol;Acc:MGI:1917672]	E
ENSRNOG00000003581	-17.8104	0.616023	0.0173839	0.0485142	1.53264	Pou2f1	POU domain, class 2, transcription factor 1 [Source:UniProtKB/Swiss-Prot;Acc:P31503]	E
ENSRNOG00000003583	-16.4626	0.856895	0.000258736	0.000978482	1.81114	Smyd2	SET and MYND domain-containing protein 2 [Source:UniProtKB/Swiss-Prot;Acc:Q7M6Z3]	E
ENSRNOG00000003585	-17.185	3.01966	3e-30	6.13e-29	8.10974	Sytl5	Synaptotagmin-like protein 5 [Source:UniProtKB/Swiss-Prot;Acc:Q812E4]	E
ENSRNOG00000003587	-19.2345	4.03474	7.4e-31	1.55e-29	16.3899	Figf	Vascular endothelial growth factor D [Source:UniProtKB/Swiss-Prot;Acc:O35251]	E
ENSRNOG00000003590	-15.1607	-1.06911	2.04e-06	9.95e-06	-2.09814	Tom1l2	TOM1-like protein 2 [Source:RefSeq peptide;Acc:NP_001101747]	A
ENSRNOG00000003591	-19.9311	-1.10915	0.00217759	0.00713811	-2.15718	None	None	A
ENSRNOG00000003597	-13.8087	-2.79728	5.23e-33	1.22e-31	-6.95127	Tuba4a	Tubulin alpha-4A chain [Source:UniProtKB/Swiss-Prot;Acc:Q5XIF6]	A
ENSRNOG00000003600	-14.5047	-1.40115	4.27e-10	2.92e-09	-2.64112	Pnpt1	polyribonucleotide nucleotidyltransferase 1, mitochondrial [Source:RefSeq peptide;Acc:NP_001135843]	A
ENSRNOG00000003601	-18.7542	-1.0624	0.000209977	0.000803259	-2.0884	RGD1564463	Uncharacterized protein [Source:UniProtKB/TrEMBL;Acc:D3ZXB2]	A
ENSRNOG00000003603	-14.6024	-2.24478	2.03e-22	2.91e-21	-4.73964	RGD1305664	RGD1305664 protein [Source:UniProtKB/TrEMBL;Acc:Q5EB79]	A
ENSRNOG00000003606	-18.3018	1.59593	1.43e-08	8.63e-08	3.0229	RGD1561381	Uncharacterized protein [Source:UniProtKB/TrEMBL;Acc:D3ZZQ8]	E
ENSRNOG00000003611	-13.3746	-3.2155	8.48e-42	2.77e-40	-9.28888	Dynlt3	dynein light chain Tctex-type 3 [Source:RefSeq peptide;Acc:NP_001013246]	A
ENSRNOG00000003612	-13.5397	1.51827	1.11e-11	8.59e-11	2.86446	Axin2	Axin-2 [Source:UniProtKB/Swiss-Prot;Acc:O70240]	E
ENSRNOG00000003613	-16.9066	2.12544	2.14e-17	2.38e-16	4.36335	TRI18_RAT	Midline-1 [Source:UniProtKB/Swiss-Prot;Acc:P82458]	E
ENSRNOG00000003614	-17.1177	-0.691181	0.00417425	0.013074	-1.6146	Mgat5	Alpha-1,6-mannosylglycoprotein 6-beta-N-acetylglucosaminyltransferase A [Source:UniProtKB/Swiss-Prot;Acc:Q08834]	A
ENSRNOG00000003620	-34.7351	-30.5619	1.35e-17	1.52e-16	-1.58505e+09	Fmo3	Dimethylaniline monooxygenase [N-oxide-forming] 3 [Source:UniProtKB/Swiss-Prot;Acc:Q9EQ76]	A
ENSRNOG00000003625	-12.5051	-1.07728	9.49e-07	4.8e-06	-2.11005	Ubxn4	UBX domain-containing protein 4 [Source:UniProtKB/Swiss-Prot;Acc:Q5HZY0]	A
ENSRNOG00000003626	-14.9055	-1.17204	1.74e-07	9.48e-07	-2.25329	Atp5h	ATP synthase subunit d, mitochondrial [Source:RefSeq peptide;Acc:NP_062256]	A
ENSRNOG00000003629	-16.0021	0.558447	0.0150863	0.0426477	1.47268	Nvl	nuclear valosin-containing protein-like [Source:RefSeq peptide;Acc:NP_001099450]	E
ENSRNOG00000003633	-20.9984	2.01812	4.16e-05	0.000174766	4.05056	Rcvrn	recoverin [Source:RefSeq peptide;Acc:NP_543177]	E
ENSRNOG00000003635	-14.7522	-1.21143	6.31e-08	3.58e-07	-2.31568	Disp1	protein dispatched homolog 1 [Source:RefSeq peptide;Acc:NP_001099453]	A
ENSRNOG00000003643	-18.3495	1.25767	5.99e-06	2.8e-05	2.39109	Tab3	TGF-beta activated kinase 1/MAP3K7 binding protein 3 Gene [Source:MGI Symbol;Acc:MGI:1913974]	E
ENSRNOG00000003645	-11.486	0.715109	0.00103377	0.00356384	1.64161	Hnrnpab	heterogeneous nuclear ribonucleoprotein A/B [Source:RefSeq peptide;Acc:NP_112620]	E
ENSRNOG00000003648	-16.6573	3.82129	5.71e-47	2.26e-45	14.1359	Cldn6	claudin 6 [Source:RefSeq peptide;Acc:NP_001095834]	E
ENSRNOG00000003650	-19.6834	2.95605	6.76e-16	6.82e-15	7.75996	LOC100360582	Uncharacterized protein [Source:UniProtKB/TrEMBL;Acc:D3ZWR1]	E
ENSRNOG00000003653	-13.4242	-1.41774	1.81e-10	1.28e-09	-2.67166	Fh1	Fumarate hydratase, mitochondrial [Source:UniProtKB/Swiss-Prot;Acc:P14408]	A
ENSRNOG00000003654	-17.2489	-1.17173	1.67e-06	8.24e-06	-2.25282	Cldn9	claudin-9 [Source:RefSeq peptide;Acc:NP_001011889]	A
ENSRNOG00000003657	-17.7746	2.49506	5.02e-20	6.4e-19	5.6375	Pkmyt1	membrane-associated tyrosine- and threonine-specific cdc2-inhibitory kinase [Source:RefSeq peptide;Acc:NP_001099236]	E
ENSRNOG00000003661	-14.0204	1.79628	2.14e-15	2.11e-14	3.47324	Hn1	Hematological and neurological expressed 1 protein [Source:UniProtKB/Swiss-Prot;Acc:Q6AXU6]	E
ENSRNOG00000003664	-13.026	-0.888541	5.15e-05	0.000213431	-1.8513	RGD1307161	BRO1 domain-containing protein BROX [Source:UniProtKB/Swiss-Prot;Acc:Q4V8K5]	A
ENSRNOG00000003666	-20.1036	-0.893614	0.0160485	0.045177	-1.85782	Igj	immunoglobulin joining chain Gene [Source:MGI Symbol;Acc:MGI:96493]	A
ENSRNOG00000003667	-15.57	1.54036	2.59e-11	1.95e-10	2.90866	DMD_RAT	Dystrophin [Source:UniProtKB/Swiss-Prot;Acc:P11530]	E
ENSRNOG00000003669	-21.0535	2.94193	3.46e-09	2.19e-08	7.68436	Myocd	Myocardin [Source:UniProtKB/Swiss-Prot;Acc:Q8R5I7]	E
ENSRNOG00000003670	-15.0419	0.642326	0.00413863	0.0129735	1.56084	None	SMT3 suppressor of mif two 3 homolog 2 (yeast) Gene [Source:MGI Symbol;Acc:MGI:2158813]	E
ENSRNOG00000003673	-14.9858	1.43016	3e-10	2.08e-09	2.69476	Nup85	Nuclear pore complex protein Nup85 [Source:UniProtKB/Swiss-Prot;Acc:Q4QQS8]	E
ENSRNOG00000003674	-15.4493	-2.64894	6.16e-29	1.19e-27	-6.27207	Pir	Pirin [Source:UniProtKB/Swiss-Prot;Acc:Q5M827]	A
ENSRNOG00000003675	-22.4449	2.61049	0.000537582	0.00193567	6.1071	Ptchd1	patched domain-containing protein 1 [Source:RefSeq peptide;Acc:NP_001178663]	E
ENSRNOG00000003680	-20.8118	2.70959	6.53e-09	4.05e-08	6.54135	Gabrb2	Gamma-aminobutyric acid receptor subunit beta-2 [Source:UniProtKB/Swiss-Prot;Acc:P63138]	E
ENSRNOG00000003681	-35.8124	28.4074	0.000152976	0.000597376	3.56023e+08	Lct	Lactase-phlorizin hydrolaseLactasePhlorizin hydrolase [Source:UniProtKB/Swiss-Prot;Acc:Q02401]	E
ENSRNOG00000003682	-16.8049	0.833269	0.000514208	0.00185536	1.78172	D4ACS1_RAT	Uncharacterized protein [Source:UniProtKB/TrEMBL;Acc:D4ACS1]	E
ENSRNOG00000003683	-36.3428	27.3466	0.00473594	0.0146113	1.70667e+08	Glp2r	Glucagon-like peptide 2 receptor [Source:UniProtKB/Swiss-Prot;Acc:Q9Z0W0]	E
ENSRNOG00000003689	-12.2177	0.898763	4.04e-05	0.000169977	1.86447	Nono	Non-POU domain-containing octamer-binding protein [Source:UniProtKB/Swiss-Prot;Acc:Q5FVM4]	E
ENSRNOG00000003691	-11.2273	-1.74071	5.8e-15	5.56e-14	-3.34199	Tmed7	transmembrane emp24 domain-containing protein 7 [Source:RefSeq peptide;Acc:NP_001099228]	A
ENSRNOG00000003694	-19.5713	6.88111	4.33e-61	3.06e-59	117.875	Prox1	prospero homeobox protein 1 [Source:RefSeq peptide;Acc:NP_001100671]	E
ENSRNOG00000003695	-21.9541	4.76029	8.44e-13	7.03e-12	27.1013	RGD1310572	Glycosyltransferase 54 domain-containing protein [Source:UniProtKB/Swiss-Prot;Acc:Q4V8F8]	E
ENSRNOG00000003696	-14.2403	-0.889857	5.85e-05	0.000240865	-1.85299	Prkx	serine/threonine-protein kinase PRKX [Source:RefSeq peptide;Acc:NP_001029135]	A
ENSRNOG00000003703	-16.0475	6.75382	5.43e-112	2.91e-109	107.92	Mcm6	DNA replication licensing factor MCM6 [Source:UniProtKB/Swiss-Prot;Acc:Q62724]	E
ENSRNOG00000003704	-21.046	2.95424	6.86e-09	4.25e-08	7.75021	Fam184b	Uncharacterized protein [Source:UniProtKB/TrEMBL;Acc:D3ZTZ0]	E
ENSRNOG00000003706	-13.614	-0.872296	7.41e-05	0.000301375	-1.83057	Ufc1	Ubiquitin-fold modifier-conjugating enzyme 1 [Source:UniProtKB/Swiss-Prot;Acc:Q6BBI8]	A
ENSRNOG00000003712	-12.1903	-0.527646	0.0153838	0.0434261	-1.44158	Smek2	serine/threonine-protein phosphatase 4 regulatory subunit 3B [Source:RefSeq peptide;Acc:NP_001101837]	A
ENSRNOG00000003715	-21.6281	3.40904	8.73e-09	5.35e-08	10.6224	Srpx2	sushi repeat-containing protein SRPX2 [Source:RefSeq peptide;Acc:NP_001101713]	E
ENSRNOG00000003716	-20.5068	2.02891	2.51e-06	1.22e-05	4.08095	Batf3	Basic leucine zipper transcriptional factor ATF-like 3 [Source:UniProtKB/Swiss-Prot;Acc:P97876]	E
ENSRNOG00000003717	-14.3999	-0.951147	1.83e-05	8.03e-05	-1.93341	Cnih4	protein cornichon homolog 4 [Source:RefSeq peptide;Acc:NP_001099451]	A
ENSRNOG00000003722	-19.4588	3.41317	6.07e-22	8.53e-21	10.6529	Dusp27	inactive dual specificity phosphatase 27 [Source:RefSeq peptide;Acc:NP_001178858]	E
ENSRNOG00000003726	-19.8905	4.8912	1.47e-33	3.5e-32	29.6754	D3ZRL8_RAT	Uncharacterized protein [Source:UniProtKB/TrEMBL;Acc:D3ZRL8]	E
ENSRNOG00000003729	-15.5626	0.801321	0.000427575	0.00156383	1.7427	D3ZDC1_RAT	Uncharacterized protein [Source:UniProtKB/TrEMBL;Acc:D3ZDC1]	E
ENSRNOG00000003730	-17.2153	1.06368	1.75e-05	7.71e-05	2.09025	LOC682999	LOC682999 proteinRCG20102, isoform CRA_a [Source:UniProtKB/TrEMBL;Acc:B1WBV1]	E
ENSRNOG00000003736	-13.7982	3.15592	4.6e-40	1.41e-38	8.91303	Col5a2	collagen, type V, alpha 2 [Source:RefSeq peptide;Acc:NP_445940]	E
ENSRNOG00000003742	-18.0082	1.02417	0.000113714	0.000451837	2.03379	LOC100364794	Uncharacterized protein [Source:UniProtKB/TrEMBL;Acc:D3ZG85]	E
ENSRNOG00000003745	-17.5777	1.98697	2.84e-14	2.6e-13	3.96403	Atf3	Cyclic AMP-dependent transcription factor ATF-3 [Source:UniProtKB/Swiss-Prot;Acc:P29596]	E
ENSRNOG00000003746	-23.21	-2.6756	0.00989861	0.0288626	-6.38906	CXB1_RAT	Gap junction beta-1 protein [Source:UniProtKB/Swiss-Prot;Acc:P08033]	A
ENSRNOG00000003748	-21.5369	-1.57465	0.0055404	0.0169337	-2.97863	RGD1565785	similar to chromosome X open reading frame 21 (RGD1565785), mRNA [Source:RefSeq DNA;Acc:NM_001109318]	A
ENSRNOG00000003749	-19.4075	2.94276	1.67e-17	1.87e-16	7.68882	Xk	Membrane transport protein XK [Source:UniProtKB/Swiss-Prot;Acc:Q5GH61]	E
ENSRNOG00000003755	-18.9485	2.28141	2.88e-13	2.48e-12	4.86152	Clgn	calmegin [Source:RefSeq peptide;Acc:NP_001102942]	E
ENSRNOG00000003756	-21.7553	3.15251	3.12e-07	1.66e-06	8.89201	Lancl3	lanC-like protein 3 [Source:RefSeq peptide;Acc:NP_001178657]	E
ENSRNOG00000003759	-15.1558	-2.82586	1.37e-32	3.13e-31	-7.09038	Galc	galactocerebrosidase [Source:RefSeq peptide;Acc:NP_001005888]	A
ENSRNOG00000003762	-15.0631	1.80268	4.66e-15	4.5e-14	3.48867	Smarca1	Uncharacterized protein [Source:UniProtKB/TrEMBL;Acc:D3ZDB2]	E
ENSRNOG00000003763	-12.8332	-2.06487	6.69e-20	8.49e-19	-4.18396	Prdx4	Peroxiredoxin-4 [Source:UniProtKB/Swiss-Prot;Acc:Q9Z0V5]	A
ENSRNOG00000003767	-14.8417	1.0544	2.64e-06	1.28e-05	2.07685	Rps6kc1	ribosomal protein S6 kinase delta-1 [Source:RefSeq peptide;Acc:NP_001099454]	E
ENSRNOG00000003769	-19.7228	1.52725	8.43e-06	3.86e-05	2.88235	Tmem163	transmembrane protein 163 [Source:RefSeq peptide;Acc:NP_001104233]	E
ENSRNOG00000003773	-14.0098	-0.921237	3.06e-05	0.000130312	-1.89374	Hmox2	Heme oxygenase 2 [Source:UniProtKB/Swiss-Prot;Acc:P23711]	A
ENSRNOG00000003778	-17.926	2.73316	1.18e-22	1.7e-21	6.64912	Opn3	opsin-3 [Source:RefSeq peptide;Acc:NP_001178862]	E
ENSRNOG00000003781	-21.7298	2.03698	0.000992553	0.0034326	4.10386	Atp10b	Uncharacterized protein [Source:UniProtKB/TrEMBL;Acc:D4A4W5]	E
ENSRNOG00000003782	-15.0829	-1.74265	2.35e-14	2.17e-13	-3.34648	Acot9	acyl-coenzyme A thioesterase 9, mitochondrial [Source:RefSeq peptide;Acc:NP_001013982]	A
ENSRNOG00000003784	-17.8811	-3.90619	6.69e-44	2.35e-42	-14.9928	Rilp	rab-interacting lysosomal protein [Source:RefSeq peptide;Acc:NP_001099281]	A
ENSRNOG00000003785	-19.8571	2.94603	7.29e-15	6.93e-14	7.70626	Usp43_predicted	ubiquitin specific protease 43 [Source:RefSeq peptide;Acc:NP_001119775]	E
ENSRNOG00000003787	-16.3146	1.29985	3.66e-08	2.12e-07	2.46203	RGD1561241	Uncharacterized protein [Source:UniProtKB/TrEMBL;Acc:D3ZCT1]	E
ENSRNOG00000003794	-15.7337	1.62542	2.92e-12	2.35e-11	3.08532	Nmral1	NmrA-like family domain-containing protein 1 [Source:UniProtKB/Swiss-Prot;Acc:P86172]	E
ENSRNOG00000003800	-15.6433	-1.56012	1.11e-11	8.57e-11	-2.94878	Rgs9	Regulator of G-protein signaling 9 [Source:UniProtKB/Swiss-Prot;Acc:P49805]	A
ENSRNOG00000003802	-17.8404	6.80248	8.72e-90	2.02e-87	111.622	PTTG1_RAT	Securin [Source:UniProtKB/Swiss-Prot;Acc:P97613]	E
ENSRNOG00000003805	-15.0811	-1.64777	4.77e-13	4.04e-12	-3.13349	Rnft1	Uncharacterized protein [Source:UniProtKB/TrEMBL;Acc:D3ZG84]	A
ENSRNOG00000003807	-36.1224	27.7874	0.000691258	0.00245074	2.31653e+08	Wnt9b	protein Wnt-9b [Source:RefSeq peptide;Acc:NP_001100525]	E
ENSRNOG00000003809	-14.701	-1.20438	7.48e-08	4.21e-07	-2.30438	Sat1	diamine acetyltransferase 1 [Source:RefSeq peptide;Acc:NP_001007668]	A
ENSRNOG00000003812	-16.68	4.31468	1.45e-56	8.56e-55	19.8997	Nlgn3	Neuroligin-3 [Source:UniProtKB/Swiss-Prot;Acc:Q62889]	E
ENSRNOG00000003813	-20.6968	4.09709	7.91e-18	9.01e-17	17.1139	Kcnk10	Potassium channel subfamily K member 10 [Source:UniProtKB/Swiss-Prot;Acc:Q9JIS4]	E
ENSRNOG00000003823	-18.9789	3.80661	3.1e-30	6.32e-29	13.9928	LOC500705	EF-hand domain-containing protein C14orf143 homolog [Source:UniProtKB/Swiss-Prot;Acc:Q6AXQ2]	E
ENSRNOG00000003829	-15.4991	-0.702176	0.00185991	0.00615562	-1.62696	Ap3s1	AP-3 complex subunit sigma-1 [Source:RefSeq peptide;Acc:NP_001100403]	A
ENSRNOG00000003831	-16.3503	1.01785	1.4e-05	6.24e-05	2.0249	Tdp1	Tyrosyl-DNA phosphodiesterase 1 [Source:UniProtKB/Swiss-Prot;Acc:Q4G056]	E
ENSRNOG00000003832	-18.4568	7.41346	4.86e-89	1.1e-86	170.48	Vash2	vasohibin-2 [Source:RefSeq peptide;Acc:NP_001102552]	E
ENSRNOG00000003833	-14.609	-1.81829	1.22e-15	1.22e-14	-3.52662	Nenf	Neudesin [Source:UniProtKB/Swiss-Prot;Acc:Q6IUR5]	A
ENSRNOG00000003835	-15.8373	1.26282	4.72e-08	2.7e-07	2.39964	Slc43a2	large neutral amino acids transporter small subunit 4 [Source:RefSeq peptide;Acc:NP_001099282]	E
ENSRNOG00000003837	-15.9063	-1.13795	7.11e-07	3.64e-06	-2.20069	Mif4gd	MIF4G domain-containing protein [Source:UniProtKB/Swiss-Prot;Acc:Q6AXU7]	A
ENSRNOG00000003841	-16.875	-4.80544	2.59e-68	2.39e-66	-27.9629	Kcnh1	potassium voltage-gated channel, subfamily H (eag-related), member 1 Gene [Source:MGI Symbol;Acc:MGI:1341721]	A
ENSRNOG00000003845	-21.329	6.00473	3.05e-26	5.29e-25	64.2101	Wnt3	wingless-type MMTV integration site family, member 3 [Source:RefSeq peptide;Acc:NP_001099185]	E
ENSRNOG00000003848	-14.173	1.38038	7.1e-10	4.78e-09	2.60338	Med12	mediator of RNA polymerase II transcription subunit 12 [Source:RefSeq peptide;Acc:NP_001180221]	E
ENSRNOG00000003849	-15.6378	-1.43227	4.09e-10	2.81e-09	-2.6987	Stx8	Syntaxin-8 [Source:UniProtKB/Swiss-Prot;Acc:Q9Z2Q7]	A
ENSRNOG00000003853	-12.6145	-1.39751	2.78e-10	1.93e-09	-2.63447	Scoc	Short coiled-coil protein [Source:UniProtKB/Swiss-Prot;Acc:Q5RJZ6]	A
ENSRNOG00000003858	-11.9093	-3.24816	6.54e-43	2.24e-41	-9.50152	Atp6ap2	Renin receptor [Source:UniProtKB/Swiss-Prot;Acc:Q6AXS4]	A
ENSRNOG00000003866	-17.4238	4.38094	1.46e-52	7.19e-51	20.8351	Cxcr4	C-X-C chemokine receptor type 4 [Source:UniProtKB/Swiss-Prot;Acc:O08565]	E
ENSRNOG00000003869	-12.6585	-4.66864	8.03e-76	1.09e-73	-25.4333	Sod3	Extracellular superoxide dismutase [Cu-Zn] [Source:UniProtKB/Swiss-Prot;Acc:Q08420]	A
ENSRNOG00000003870	-18.9985	1.33356	1.57e-05	6.97e-05	2.52024	C1qtnf2	complement C1q tumor necrosis factor-related protein 2 [Source:RefSeq peptide;Acc:NP_001178847]	E
ENSRNOG00000003876	-19.2757	6.94007	1.27e-67	1.15e-65	122.792	Exo1	exonuclease 1 [Source:RefSeq peptide;Acc:NP_001100668]	E
ENSRNOG00000003878	-19.7014	4.92898	5.75e-36	1.5e-34	30.4628	Thsd7b	thrombospondin type-1 domain-containing protein 7B [Source:RefSeq peptide;Acc:NP_001178598]	E
ENSRNOG00000003879	-13.2892	-0.61567	0.00491241	0.0151146	-1.53227	Rnf167	E3 ubiquitin-protein ligase RNF167 [Source:UniProtKB/Swiss-Prot;Acc:Q5XIL0]	A
ENSRNOG00000003880	-36.1191	27.7939	0.000691258	0.00245074	2.32697e+08	Tph2	Tryptophan 5-hydroxylase 2 [Source:UniProtKB/Swiss-Prot;Acc:Q8CGU9]	E
ENSRNOG00000003881	-13.3796	-1.20002	5.71e-08	3.25e-07	-2.29743	Nit1	Nitrilase homolog 1 [Source:UniProtKB/Swiss-Prot;Acc:Q7TQ94]	A
ENSRNOG00000003883	-15.9893	-0.557434	0.0145547	0.0412849	-1.47165	LOC317456	LRRGT00013 [Source:UniProtKB/TrEMBL;Acc:Q6TXI6]	A
ENSRNOG00000003884	-21.881	-2.50054	3.91e-05	0.000164431	-5.65896	Acmsd	2-amino-3-carboxymuconate-6-semialdehyde decarboxylase [Source:UniProtKB/Swiss-Prot;Acc:Q8R5M5]	A
ENSRNOG00000003887	-22.422	5.81994	2.92e-14	2.67e-13	56.4905	Lgi2	leucine-rich repeat LGI family member 2 [Source:RefSeq peptide;Acc:NP_001100689]	E
ENSRNOG00000003888	-21.6594	2.69642	4.45e-06	2.1e-05	6.48191	Rgs13	Similar to RGS13 (Predicted)Uncharacterized protein [Source:UniProtKB/TrEMBL;Acc:D3ZCS1]	E
ENSRNOG00000003890	-11.8394	0.777946	0.000365783	0.0013526	1.71469	Nap1l1	Nucleosome assembly protein 1-like 1 [Source:UniProtKB/Swiss-Prot;Acc:Q9Z2G8]	E
ENSRNOG00000003893	-16.5988	2.58486	4.52e-25	7.44e-24	5.99957	Ccnjl	cyclin J-like [Source:RefSeq peptide;Acc:NP_001032862]	E
ENSRNOG00000003894	-35.6486	28.7349	9.42e-06	4.28e-05	4.4674e+08	Dio2	Type II iodothyronine deiodinase [Source:UniProtKB/Swiss-Prot;Acc:P70551]	E
ENSRNOG00000003895	-21.3993	-1.29122	0.0166399	0.0466636	-2.44735	Rgs1	Regulator of G-protein signaling 1 [Source:UniProtKB/Swiss-Prot;Acc:P97844]	A
ENSRNOG00000003896	-36.2799	27.4724	0.00248165	0.00803652	1.86212e+08	Tnmd	Tenomodulin [Source:UniProtKB/Swiss-Prot;Acc:Q9ESC2]	E
ENSRNOG00000003897	-13.5809	5.18395	3.3e-87	7.05e-85	36.3517	Col1a1	Collagen alpha-1(I) chain [Source:UniProtKB/Swiss-Prot;Acc:P02454]	E
ENSRNOG00000003901	-11.768	-1.06357	1.24e-06	6.18e-06	-2.0901	Ccdc104	Coiled-coil domain-containing protein 104 [Source:UniProtKB/Swiss-Prot;Acc:Q4V8E4]	A
ENSRNOG00000003908	-15.184	2.24047	1.15e-21	1.6e-20	4.7255	4930534B04Rik	RIKEN cDNA 4930534B04 gene Gene [Source:MGI Symbol;Acc:MGI:1922466]	E
ENSRNOG00000003910	-20.6523	2.45581	2.04e-08	1.21e-07	5.4862	D3ZCQ4_RAT	Uncharacterized protein [Source:UniProtKB/TrEMBL;Acc:D3ZCQ4]	E
ENSRNOG00000003917	-16.3546	2.25074	2.75e-20	3.57e-19	4.75928	Uck2	Uridine-cytidine kinase 2 [Source:UniProtKB/Swiss-Prot;Acc:Q9QYG8]	E
ENSRNOG00000003923	-13.3659	-1.85537	1.69e-16	1.77e-15	-3.61845	Rab21	Ras-related protein Rab-21 [Source:UniProtKB/Swiss-Prot;Acc:Q6AXT5]	A
ENSRNOG00000003927	-18.5715	3.10227	5.3e-24	8.22e-23	8.58769	Cd55	decay accelerating factor 1 [Source:RefSeq peptide;Acc:NP_071605]	E
ENSRNOG00000003928	-13.3302	-2.32158	3.35e-24	5.26e-23	-4.99879	Tmco1	Transmembrane and coiled-coil domains protein 1 [Source:UniProtKB/Swiss-Prot;Acc:Q5I0H4]	A
ENSRNOG00000003929	-18.0924	5.9987	2.51e-73	2.96e-71	63.9422	Pcdh19	protocadherin-19 [Source:RefSeq peptide;Acc:NP_001162600]	E
ENSRNOG00000003940	-18.6766	0.732436	0.0112945	0.0326423	1.66144	LOC100364999	None	E
ENSRNOG00000003941	-16.1342	-0.694415	0.00256551	0.00829171	-1.61823	None	None	A
ENSRNOG00000003946	-13.5616	-1.39099	3.98e-10	2.73e-09	-2.62258	Tor1aip1	Torsin-1A-interacting protein 1 [Source:UniProtKB/Swiss-Prot;Acc:Q5PQX1]	A
ENSRNOG00000003947	-19.5344	3.2534	2.27e-19	2.81e-18	9.53612	Ntn1	Netrin-1 [Source:UniProtKB/Swiss-Prot;Acc:Q924Z9]	E
ENSRNOG00000003948	-14.0515	2.10894	3.15e-20	4.06e-19	4.31373	Llgl1	Lethal(2) giant larvae protein homolog 1 [Source:UniProtKB/Swiss-Prot;Acc:Q8K4K5]	E
ENSRNOG00000003949	-16.3015	2.04243	2.76e-17	3.04e-16	4.11938	Phka2	phosphorylase b kinase regulatory subunit alpha, liver isoform [Source:RefSeq peptide;Acc:NP_001177923]	E
ENSRNOG00000003950	-36.1206	27.7908	0.000691258	0.00245074	2.32206e+08	Lvrn	Uncharacterized protein [Source:UniProtKB/TrEMBL;Acc:D3ZZW8]	E
ENSRNOG00000003953	-13.6775	-1.32694	2.34e-09	1.51e-08	-2.50871	RB3GP_RAT	Rab3 GTPase-activating protein catalytic subunit [Source:UniProtKB/Swiss-Prot;Acc:P69735]	A
ENSRNOG00000003954	-20.0629	2.93095	1.35e-13	1.19e-12	7.62611	Il2rg	cytokine receptor common subunit gamma [Source:RefSeq peptide;Acc:NP_543165]	E
ENSRNOG00000003955	-14.8123	-1.01625	5.38e-06	2.52e-05	-2.02265	Spata7	Spermatogenesis-associated protein 7 homolog [Source:UniProtKB/Swiss-Prot;Acc:Q9R0A3]	A
ENSRNOG00000003956	-19.2393	2.04792	1.26e-10	9.01e-10	4.13508	LOC100363276	Uncharacterized protein [Source:UniProtKB/TrEMBL;Acc:D3ZBJ6]	E
ENSRNOG00000003959	-19.6325	1.31093	0.000164585	0.000639573	2.48102	Rgs18	Regulator of G-protein signaling 18 [Source:UniProtKB/Swiss-Prot;Acc:Q4L0E8]	E
ENSRNOG00000003960	-13.8425	-8.45632	6.25e-169	2.3e-165	-351.242	Tmem27	Collectrin [Source:UniProtKB/Swiss-Prot;Acc:Q9ESG3]	A
ENSRNOG00000003964	-15.2974	0.623151	0.00567131	0.0173033	1.54024	Nsmce2	E3 SUMO-protein ligase NSE2 [Source:UniProtKB/Swiss-Prot;Acc:Q4V8A0]	E
ENSRNOG00000003967	-14.1609	-0.918628	3.3e-05	0.00014008	-1.89032	Tmem49	Transmembrane protein 49 [Source:UniProtKB/Swiss-Prot;Acc:Q91ZQ0]	A
ENSRNOG00000003969	-20.6214	1.81975	2.84e-05	0.00012199	3.5302	Fam20a	family with sequence similarity 20, member A [Source:RefSeq peptide;Acc:NP_001012237]	E
ENSRNOG00000003971	-15.0152	-0.539602	0.015547	0.0438615	-1.45357	Gosr1	Golgi SNAP receptor complex member 1 [Source:UniProtKB/Swiss-Prot;Acc:Q62931]	A
ENSRNOG00000003972	-19.9905	3.28948	4.41e-17	4.8e-16	9.77757	Tshr	Thyrotropin receptor [Source:UniProtKB/Swiss-Prot;Acc:P21463]	E
ENSRNOG00000003973	-14.5944	-2.08122	1.04e-19	1.31e-18	-4.23164	Cyb5r1	NADH-cytochrome b5 reductase 1 [Source:UniProtKB/Swiss-Prot;Acc:Q5EB81]	A
ENSRNOG00000003975	-12.8739	1.5966	8.29e-13	6.92e-12	3.02429	Pfn1	Profilin-1 [Source:UniProtKB/Swiss-Prot;Acc:P62963]	E
ENSRNOG00000003977	-15.3989	2.06619	1.04e-18	1.23e-17	4.1878	Dusp1	Dual specificity protein phosphatase 1 [Source:UniProtKB/Swiss-Prot;Acc:Q64623]	E
ENSRNOG00000003979	-16.9433	0.991111	4.3e-05	0.000180049	1.98772	D3ZDS8_RAT	Uncharacterized protein [Source:UniProtKB/TrEMBL;Acc:D3Z9T5]	E
ENSRNOG00000003980	-13.9888	-0.958672	1.45e-05	6.46e-05	-1.94352	Ttc1	tetratricopeptide repeat protein 1 [Source:RefSeq peptide;Acc:NP_001005529]	A
ENSRNOG00000003981	-15.5658	-0.655858	0.00367142	0.0116039	-1.57555	Znf18	Zinc finger protein 18 [Source:UniProtKB/Swiss-Prot;Acc:Q642B9]	A
ENSRNOG00000003982	-14.3762	-0.695717	0.00165854	0.00553453	-1.61969	PTN21_RAT	Tyrosine-protein phosphatase non-receptor type 21 [Source:UniProtKB/Swiss-Prot;Acc:Q62728]	A
ENSRNOG00000003983	-14.6868	0.755819	0.000693655	0.00245861	1.68859	Pfdn2	Prefoldin subunit 2 [Source:UniProtKB/Swiss-Prot;Acc:B0BN18]	E
ENSRNOG00000003984	-19.859	6.94932	3.19e-57	1.93e-55	123.582	Apln	ApelinApelin-36Apelin-31Apelin-28Apelin-13 [Source:UniProtKB/Swiss-Prot;Acc:Q9R0R3]	E
ENSRNOG00000003985	-15.5294	-1.75179	2.87e-14	2.63e-13	-3.36777	Tmem19	Transmembrane protein 19 [Source:UniProtKB/Swiss-Prot;Acc:Q6P726]	A
ENSRNOG00000003988	-16.2396	0.807257	0.000530304	0.00191134	1.74988	DJC27_RAT	DnaJ homolog subfamily C member 27 [Source:UniProtKB/Swiss-Prot;Acc:Q6IML7]	E
ENSRNOG00000003992	-20.2771	3.19818	1.88e-14	1.74e-13	9.17797	Pik3r6	phosphoinositide 3-kinase regulatory subunit 6 [Source:RefSeq peptide;Acc:NP_001074913]	E
ENSRNOG00000003997	-17.1957	-4.05581	4.73e-51	2.2e-49	-16.6311	Pld5	inactive phospholipase D5 [Source:RefSeq peptide;Acc:NP_001178603]	A
ENSRNOG00000003998	-21.2659	-3.09307	6.95e-10	4.68e-09	-8.53308	Sgca	alpha-sarcoglycan [Source:RefSeq peptide;Acc:NP_001100509]	A
ENSRNOG00000003999	-17.7139	2.1715	4.6e-16	4.7e-15	4.50493	Adcy3	Adenylate cyclase type 3 [Source:UniProtKB/Swiss-Prot;Acc:P21932]	E
ENSRNOG00000004000	-15.9335	-0.766393	0.000800422	0.00281001	-1.70101	RGD1306595	UPF0629 protein C17orf42 homolog [Source:UniProtKB/Swiss-Prot;Acc:Q4KM51]	A
ENSRNOG00000004001	-15.9289	-1.10643	1.49e-06	7.37e-06	-2.15312	Osgepl1	Probable O-sialoglycoprotein endopeptidase 2 [Source:UniProtKB/Swiss-Prot;Acc:Q4V7F3]	A
ENSRNOG00000004002	-15.5938	-0.675647	0.00277207	0.00891143	-1.59731	Pgam1	None	A
ENSRNOG00000004003	-16.3068	-1.0448	6.84e-06	3.17e-05	-2.06309	Dusp10	dual specificity protein phosphatase 10 [Source:RefSeq peptide;Acc:NP_001099204]	A
ENSRNOG00000004006	-13.9376	-3.25747	2.12e-42	7.11e-41	-9.56304	Dnajb9	DnaJ homolog subfamily B member 9 [Source:UniProtKB/Swiss-Prot;Acc:P97554]	A
ENSRNOG00000004011	-15.3178	0.948888	2.78e-05	0.000119382	1.93038	Nedd1	protein NEDD1 [Source:RefSeq peptide;Acc:NP_001100249]	E
ENSRNOG00000004013	-15.9258	1.40543	1.57e-09	1.03e-08	2.64896	Grip1	Glutamate receptor-interacting protein 1 [Source:UniProtKB/Swiss-Prot;Acc:P97879]	E
ENSRNOG00000004014	-16.177	0.560346	0.0155697	0.0439173	1.47462	Chmp6	charged multivesicular body protein 6 [Source:RefSeq peptide;Acc:NP_001099326]	E
ENSRNOG00000004018	-18.3684	-1.01287	0.000222138	0.00084725	-2.01793	Tdrd5	tudor domain containing 5 isoform b [Source:RefSeq peptide;Acc:NP_001128212]	A
ENSRNOG00000004019	-17.4887	5.20569	1.02e-66	8.87e-65	36.9036	Phlda1	Pleckstrin homology-like domain family A member 1 [Source:UniProtKB/Swiss-Prot;Acc:Q9QZA1]	E
ENSRNOG00000004026	-13.13	-0.59737	0.00631003	0.0190724	-1.51296	Atp2b1	Plasma membrane calcium-transporting ATPase 1 [Source:UniProtKB/Swiss-Prot;Acc:P11505]	A
ENSRNOG00000004030	-20.8284	2.36703	3.72e-07	1.96e-06	5.15877	Nphs2	Podocin [Source:UniProtKB/Swiss-Prot;Acc:Q8K4G9]	E
ENSRNOG00000004032	-14.8202	1.30883	6.79e-09	4.21e-08	2.4774	D3ZUJ3_RAT	Uncharacterized protein [Source:UniProtKB/TrEMBL;Acc:D3ZUJ3]	E
ENSRNOG00000004033	-16.0544	6.08477	5.23e-98	1.67e-95	67.8732	D3ZWK9_RAT	Sema domain, transmembrane domain (TM), and cytoplasmic domain, (Semaphorin) 6A (Predicted), isoform CRA_aUncharacterized protein [Source:UniProtKB/TrEMBL;Acc:D3ZAG0]	E
ENSRNOG00000004036	-16.0627	0.669383	0.00363481	0.0114981	1.59039	Snx12	sorting nexin 12 [Source:RefSeq peptide;Acc:NP_001102287]	E
ENSRNOG00000004041	-16.2419	-0.728511	0.00160018	0.00535131	-1.65693	D3ZB21_RAT	Uncharacterized protein [Source:UniProtKB/TrEMBL;Acc:D3ZB21]	A
ENSRNOG00000004048	-13.6466	-1.93814	1.02e-17	1.15e-16	-3.83211	Lrrk2	leucine-rich repeat serine/threonine-protein kinase 2 [Source:RefSeq peptide;Acc:NP_001178718]	A
ENSRNOG00000004049	-16.3679	1.06524	5.75e-06	2.68e-05	2.09252	Baiap2	Brain-specific angiogenesis inhibitor 1-associated protein 2 [Source:UniProtKB/Swiss-Prot;Acc:Q6GMN2]	E
ENSRNOG00000004057	-13.598	0.878413	6.7e-05	0.000273795	1.83835	Ccdc88a	Uncharacterized protein [Source:UniProtKB/TrEMBL;Acc:D3ZAF0]	E
ENSRNOG00000004059	-15.8148	-0.719862	0.00156834	0.00525256	-1.64702	RGD1561792	similar to CG14903-PA (RGD1561792), mRNA [Source:RefSeq DNA;Acc:NM_001134524]	A
ENSRNOG00000004060	-9.95748	-1.36751	5.45e-10	3.7e-09	-2.58025	Calm1	Calmodulin [Source:UniProtKB/Swiss-Prot;Acc:P62161]	A
ENSRNOG00000004063	-17.8841	4.56748	1.4e-51	6.66e-50	23.711	RGD1309926	Uncharacterized protein [Source:UniProtKB/TrEMBL;Acc:D3ZAF9]	E
ENSRNOG00000004067	-17.4512	0.642847	0.00867354	0.0256482	1.56141	Nrcam	Neuronal cell adhesion molecule [Source:UniProtKB/Swiss-Prot;Acc:P97686]	E
ENSRNOG00000004068	-12.8247	-0.774045	0.000404992	0.00148585	-1.71006	Ncoa1	nuclear receptor coactivator 1 [Source:RefSeq peptide;Acc:NP_001101482]	A
ENSRNOG00000004076	-15.5362	-1.72567	6.78e-14	6.07e-13	-3.30735	D3ZBG3_RAT	Uncharacterized protein [Source:UniProtKB/TrEMBL;Acc:D3ZAX8]	A
ENSRNOG00000004077	-21.6872	-1.48379	0.0117601	0.033898	-2.79683	Kcnc2	Potassium voltage-gated channel subfamily C member 2 [Source:UniProtKB/Swiss-Prot;Acc:P22462]	A
ENSRNOG00000004078	-18.0859	0.650692	0.0156137	0.0440287	1.56992	Eno3	Beta-enolase [Source:UniProtKB/Swiss-Prot;Acc:P15429]	E
ENSRNOG00000004084	-17.2294	4.47912	4.66e-56	2.67e-54	22.3024	Fam84a	family with sequence similarity 84, member A [Source:RefSeq peptide;Acc:NP_001120771]	E
ENSRNOG00000004085	-15.2555	-1.88502	2.48e-16	2.58e-15	-3.69358	Toag1	tolerance-associated gene 1 [Source:RefSeq peptide;Acc:NP_001104308]	A
ENSRNOG00000004089	-8.00096	-7.58707	2.44e-152	6e-149	-192.281	ENPP2_RAT	Ectonucleotide pyrophosphatase/phosphodiesterase family member 2 [Source:UniProtKB/Swiss-Prot;Acc:Q64610]	A
ENSRNOG00000004090	-14.6679	1.49587	3.92e-11	2.91e-10	2.82035	None	None	E
ENSRNOG00000004100	-18.8306	2.91675	2.52e-20	3.27e-19	7.55141	Trib1	tribbles homolog 1 [Source:RefSeq peptide;Acc:NP_076475]	E
ENSRNOG00000004103	-14.1306	-2.0801	7.32e-20	9.27e-19	-4.22837	Trappc6b	trafficking protein particle complex subunit 6B [Source:RefSeq peptide;Acc:NP_001100203]	A
ENSRNOG00000004104	-17.05	0.70847	0.00356912	0.0113024	1.63407	Zfp167	zinc finger protein 167 [Source:RefSeq peptide;Acc:NP_001164048]	E
ENSRNOG00000004106	-14.1228	-0.671376	0.00232587	0.00759211	-1.59259	Zfc3h1	zinc finger, C3H1-type containing Gene [Source:MGI Symbol;Acc:MGI:2446143]	A
ENSRNOG00000004109	-18.0507	3.45928	2.85e-32	6.44e-31	10.9988	Zfpm2	zinc finger protein ZFPM2 [Source:RefSeq peptide;Acc:NP_001123973]	E
ENSRNOG00000004110	-15.8463	3.5187	3.94e-44	1.41e-42	11.4613	Trib2	tribbles homolog 2 [Source:RefSeq peptide;Acc:NP_001101485]	E
ENSRNOG00000004112	-19.7508	1.44417	6.02e-05	0.000247605	2.72106	RGD1308775	similar to RIKEN cDNA 4921536K21 (RGD1308775), mRNA [Source:RefSeq DNA;Acc:NM_001107233]	E
ENSRNOG00000004118	-13.5342	-2.0919	3.23e-20	4.16e-19	-4.2631	Frmpd4	FERM and PDZ domain-containing protein 4 [Source:RefSeq peptide;Acc:NP_001100430]	A
ENSRNOG00000004120	-18.689	1.50181	3.37e-07	1.79e-06	2.83197	RGD1565844	similar to RIKEN cDNA 1700045I19 (RGD1565844), mRNA [Source:RefSeq DNA;Acc:NM_001108255]	E
ENSRNOG00000004124	-23.3554	3.95327	0.000156227	0.000609021	15.49	Grpr	Gastrin-releasing peptide receptor [Source:UniProtKB/Swiss-Prot;Acc:P52500]	E
ENSRNOG00000004127	-13.6437	1.80904	1.09e-15	1.1e-14	3.50409	D3ZET9_RAT	Uncharacterized protein [Source:UniProtKB/TrEMBL;Acc:D3ZET9]	E
ENSRNOG00000004131	-14.6469	0.840337	0.000162391	0.000631546	1.79047	Pkn1	Serine/threonine-protein kinase N1 [Source:UniProtKB/Swiss-Prot;Acc:Q63433]	E
ENSRNOG00000004133	-20.7423	3.18549	5.76e-12	4.53e-11	9.09765	Slc7a3	Cationic amino acid transporter 3 [Source:UniProtKB/Swiss-Prot;Acc:O08812]	E
ENSRNOG00000004137	-16.2661	1.66488	2.6e-12	2.1e-11	3.17088	Ubtd2		E
ENSRNOG00000004141	-13.1137	-1.34081	1.42e-09	9.35e-09	-2.53293	Vasn	vasorin [Source:RefSeq peptide;Acc:NP_001102852]	A
ENSRNOG00000004143	-11.2817	-1.50617	1.03e-11	8.01e-11	-2.84055	Adipor1	adiponectin receptor protein 1 [Source:RefSeq peptide;Acc:NP_997470]	A
ENSRNOG00000004145	-16.3529	-1.65416	2.26e-12	1.83e-11	-3.1474	Ncrna00117	prdX-deacylase domain-containing protein 1 [Source:RefSeq peptide;Acc:NP_001099492]	A
ENSRNOG00000004146	-15.5703	1.82644	4.59e-15	4.43e-14	3.54661	Coro7	Coronin-7 [Source:UniProtKB/Swiss-Prot;Acc:O35828]	E
ENSRNOG00000004147	-20.2014	-3.68544	2.85e-21	3.87e-20	-12.8655	D3ZCF8_RAT	Uncharacterized protein [Source:UniProtKB/TrEMBL;Acc:D3ZCF8]	A
ENSRNOG00000004148	-14.0654	-0.830334	0.000168987	0.000655815	-1.7781	Pctk2	Cell division protein kinase 17 [Source:UniProtKB/Swiss-Prot;Acc:O35831]	A
ENSRNOG00000004149	-20.3084	2.653	1.34e-10	9.6e-10	6.28974	Mgat4c	alpha-1,3-mannosyl-glycoprotein 4-beta-N-acetylglucosaminyltransferase C [Source:RefSeq peptide;Acc:NP_001129286]	E
ENSRNOG00000004150	-17.6478	-1.74436	7.35e-12	5.76e-11	-3.35047	Slc9a7	sodium/hydrogen exchanger 7 [Source:RefSeq peptide;Acc:NP_001101712]	A
ENSRNOG00000004155	-19.3573	3.61192	1.57e-24	2.51e-23	12.2263	Samd14	Sterile alpha motif domain-containing protein 14 [Source:UniProtKB/Swiss-Prot;Acc:Q5BJU3]	E
ENSRNOG00000004158	-17.6624	1.94427	1.47e-13	1.29e-12	3.84844	Hdac9		E
ENSRNOG00000004160	-11.9504	-3.44413	3.33e-47	1.33e-45	-10.8839	Prps2	Ribose-phosphate pyrophosphokinase 2 [Source:UniProtKB/Swiss-Prot;Acc:P09330]	A
ENSRNOG00000004161	-15.6179	-1.22282	8.28e-08	4.64e-07	-2.33403	Mtif2	translation initiation factor IF-2, mitochondrial [Source:RefSeq peptide;Acc:NP_001004254]	A
ENSRNOG00000004162	-15.0228	-1.59671	2.09e-12	1.7e-11	-3.02454	Pfkfb2	6-phosphofructo-2-kinase/fructose-2,6-biphosphatase 26-phosphofructo-2-kinaseFructose-2,6-bisphosphatase [Source:UniProtKB/Swiss-Prot;Acc:Q9JJH5]	A
ENSRNOG00000004165	-16.1444	1.08846	3.03e-06	1.46e-05	2.12647	Prkd1	Serine/threonine-protein kinase D1 [Source:UniProtKB/Swiss-Prot;Acc:Q9WTQ1]	E
ENSRNOG00000004168	-15.3763	-0.973246	1.56e-05	6.94e-05	-1.96325	Slc35e4	Solute carrier family 35 member E4 [Source:UniProtKB/Swiss-Prot;Acc:Q5RKL7]	A
ENSRNOG00000004169	-14.9693	1.6938	1.35e-13	1.19e-12	3.23508	Fzr1	fizzy-related protein homolog [Source:RefSeq peptide;Acc:NP_001101544]	E
ENSRNOG00000004171	-13.9916	0.669751	0.00237045	0.00773078	1.5908	LOC100363013		E
ENSRNOG00000004172	-14.1355	-2.13259	9.8e-21	1.3e-19	-4.38505	Pdk2	[Pyruvate dehydrogenase [lipoamide]] kinase isozyme 2, mitochondrial [Source:UniProtKB/Swiss-Prot;Acc:Q64536]	A
ENSRNOG00000004177	-17.2758	2.0222	2.54e-15	2.49e-14	4.06203	Myo1a		E
ENSRNOG00000004179	-21.4891	3.69131	5.73e-11	4.2e-10	12.918	Nts	Neurotensin/neuromedin NLarge neuromedin NNeuromedin NNeurotensinTail peptide [Source:UniProtKB/Swiss-Prot;Acc:P20068]	E
ENSRNOG00000004180	-35.489	29.0542	3.59e-07	1.89e-06	5.57421e+08	Fam19a2-Tn(sb-T2/Bart3)2.184Mcwi-		E
ENSRNOG00000004183	-15.4702	-0.885389	8.78e-05	0.000354344	-1.84726	Ccdc59	coiled-coil domain containing 59 [Source:RefSeq peptide;Acc:NP_001101560]	A
ENSRNOG00000004186	-13.9998	-1.05969	1.72e-06	8.49e-06	-2.08448	Snx13	sorting nexin-13 [Source:RefSeq peptide;Acc:NP_001102178]	A
ENSRNOG00000004189	-15.335	-0.598427	0.00759726	0.0226657	-1.51406	Helb	Uncharacterized protein [Source:UniProtKB/TrEMBL;Acc:D4AAN8]	A
ENSRNOG00000004192	-18.8985	1.88898	7.19e-10	4.83e-09	3.70373	Arhgap30	rho GTPase-activating protein 30 [Source:RefSeq peptide;Acc:NP_001102547]	E
ENSRNOG00000004193	-14.9797	-0.555505	0.0125558	0.0360121	-1.46968	Klhl12	Kelch-like protein 12 [Source:UniProtKB/Swiss-Prot;Acc:Q8R2H4]	A
ENSRNOG00000004195	-18.7971	6.73064	2.62e-73	3.06e-71	106.2	Dtl	Uncharacterized protein [Source:UniProtKB/TrEMBL;Acc:D3ZCI1]	E
ENSRNOG00000004196	-14.0092	0.575568	0.00903846	0.0266445	1.49026	LOC100364502	40S ribosomal protein S29 [Source:UniProtKB/Swiss-Prot;Acc:P62275]	E
ENSRNOG00000004198	-19.4644	2.0265	3.1e-09	1.97e-08	4.07414	Stxbp6	syntaxin-binding protein 6 [Source:RefSeq peptide;Acc:NP_001178801]	E
ENSRNOG00000004200	-18.8479	1.1642	0.000109426	0.000435914	2.2411	Golsyn		E
ENSRNOG00000004201	-16.6233	0.675462	0.00417724	0.0130806	1.59711	Rims2	Regulating synaptic membrane exocytosis protein 2 [Source:UniProtKB/Swiss-Prot;Acc:Q9JIS1]	E
ENSRNOG00000004205	-13.7656	-1.45476	6.89e-11	5.03e-10	-2.7411	Sgk493	protein kinase domain-containing protein, cytoplasmic [Source:RefSeq peptide;Acc:NP_001101477]	A
ENSRNOG00000004206	-13.4877	-0.849855	0.000110578	0.000440206	-1.80232	Glrx5	glutaredoxin-related protein 5, mitochondrial [Source:RefSeq peptide;Acc:NP_001102192]	A
ENSRNOG00000004210	-17.8554	4.79249	8.03e-56	4.53e-54	27.7129	Osr1	protein odd-skipped-related 1 [Source:RefSeq peptide;Acc:NP_001100186]	E
ENSRNOG00000004212	-15.5645	2.07965	9.2e-19	1.1e-17	4.22705	Fbxw9	F-box and WD repeat domain containing 9 [Source:RefSeq peptide;Acc:NP_001075103]	E
ENSRNOG00000004216	-21.5478	5.57301	1.35e-20	1.77e-19	47.6038	Ppil5	peptidylprolyl isomerase-like 5 [Source:RefSeq peptide;Acc:NP_001102953]	E
ENSRNOG00000004217	-16.3586	0.641639	0.00589573	0.0179397	1.5601	Stk10	serine/threonine-protein kinase 10 [Source:RefSeq peptide;Acc:NP_062079]	E
ENSRNOG00000004219	-15.1917	0.810021	0.000320153	0.00119466	1.75324	Dhps	Deoxyhypusine synthase [Source:UniProtKB/Swiss-Prot;Acc:Q6AY53]	E
ENSRNOG00000004220	-13.5711	-2.19246	6.83e-22	9.56e-21	-4.57083	Ebag9	Receptor-binding cancer antigen expressed on SiSo cells [Source:UniProtKB/Swiss-Prot;Acc:Q5PQP2]	A
ENSRNOG00000004221	-20.2995	4.44586	3.69e-24	5.79e-23	21.794	Lgr5	leucine-rich repeat-containing G-protein coupled receptor 5 [Source:RefSeq peptide;Acc:NP_001100254]	E
ENSRNOG00000004226	-17.7948	-1.16669	5.29e-06	2.48e-05	-2.24495	Irak3	interleukin-1 receptor-associated kinase 3 [Source:RefSeq peptide;Acc:NP_001101571]	A
ENSRNOG00000004229	-23.2808	-3.7019	0.000152976	0.000597376	-13.0132	Tac2	Tachykinin-3Neurokinin-B [Source:UniProtKB/Swiss-Prot;Acc:P08435]	A
ENSRNOG00000004232	-14.958	1.54482	1.15e-11	8.87e-11	2.91767	G2e3	G2/M phase-specific E3 ubiquitin-protein ligase [Source:RefSeq peptide;Acc:NP_001100196]	E
ENSRNOG00000004234	-13.3138	-1.23369	2.47e-08	1.46e-07	-2.35168	Mgat2	Alpha-1,6-mannosyl-glycoprotein 2-beta-N-acetylglucosaminyltransferase [Source:UniProtKB/Swiss-Prot;Acc:Q09326]	A
ENSRNOG00000004242	-18.8066	3.13651	6.42e-23	9.41e-22	8.79394	Pole2	polymerase (DNA directed), epsilon 2 [Source:RefSeq peptide;Acc:NP_001162579]	E
ENSRNOG00000004245	-17.4016	1.2096	1.62e-06	8.02e-06	2.31273	Mgst3	microsomal glutathione S-transferase 3 [Source:RefSeq peptide;Acc:NP_001178523]	E
ENSRNOG00000004247	-15.8992	1.51146	8.99e-11	6.5e-10	2.85098	Nhp2	NHP2 ribonucleoprotein homolog [Source:RefSeq peptide;Acc:NP_001099249]	E
ENSRNOG00000004249	-18.7554	0.945541	0.00122586	0.00419807	1.92591	Tlr7	toll-like receptor 7 [Source:RefSeq peptide;Acc:NP_001091051]	E
ENSRNOG00000004257	-15.6127	1.45157	3.17e-10	2.2e-09	2.73505	Ctps2	CTP synthase 2 [Source:UniProtKB/Swiss-Prot;Acc:Q5U2N0]	E
ENSRNOG00000004258	-20.048	5.40322	1.28e-36	3.4e-35	42.3186	Chst7	Carbohydrate sulfotransferase 7 [Source:UniProtKB/Swiss-Prot;Acc:Q6XQG8]	E
ENSRNOG00000004259	-15.4022	1.14454	4.97e-07	2.59e-06	2.21076	Dohh	Deoxyhypusine hydroxylase [Source:UniProtKB/Swiss-Prot;Acc:Q5PPJ4]	E
ENSRNOG00000004263	-14.5422	1.24654	2.77e-08	1.62e-07	2.37272	Ints7	integrator complex subunit 7 [Source:RefSeq peptide;Acc:NP_001178604]	E
ENSRNOG00000004265	-34.8954	30.2414	9.89e-14	8.77e-13	1.26931e+09	RGD1559731	Uncharacterized protein [Source:UniProtKB/TrEMBL;Acc:D3ZCG1]	E
ENSRNOG00000004269	-19.917	2.20646	3.41e-09	2.16e-08	4.6154	Myt1l	Myelin transcription factor 1-like protein [Source:UniProtKB/Swiss-Prot;Acc:P70475]	E
ENSRNOG00000004273	-16.1592	0.618057	0.00752928	0.0224902	1.53481	Ifitm1	interferon-induced transmembrane protein 1 [Source:RefSeq peptide;Acc:NP_001099784]	E
ENSRNOG00000004275	-17.5373	2.3356	8.58e-19	1.03e-17	5.0476	Egfl6	epidermal growth factor-like protein 6 [Source:RefSeq peptide;Acc:NP_001101724]	E
ENSRNOG00000004276	-12.4873	-1.10811	4.66e-07	2.44e-06	-2.15563	D3ZQM3_RAT	Uncharacterized protein [Source:UniProtKB/TrEMBL;Acc:D3ZCG9]	A
ENSRNOG00000004279	-13.4724	0.687365	0.00174949	0.00581368	1.61034	D4AB42_RAT	Uncharacterized protein [Source:UniProtKB/TrEMBL;Acc:D3ZZF2]	E
ENSRNOG00000004280	-12.3324	-2.24698	4.63e-23	6.82e-22	-4.74688	Tcn2	Transcobalamin-2 [Source:UniProtKB/Swiss-Prot;Acc:Q9R0D6]	A
ENSRNOG00000004281	-16.5265	1.73359	6.52e-13	5.47e-12	3.32555	Cobl	protein cordon-bleu [Source:RefSeq peptide;Acc:NP_001100706]	E
ENSRNOG00000004283	-14.9408	-1.46786	8.19e-11	5.94e-10	-2.76612	Camta2	calmodulin-binding transcription activator 2 [Source:RefSeq peptide;Acc:NP_001099271]	A
ENSRNOG00000004290	-13.3684	5.6324	1.26e-98	4.22e-96	49.6046	Grb10	Growth factor receptor-bound protein 10 [Source:UniProtKB/Swiss-Prot;Acc:P0CE43]	E
ENSRNOG00000004291	-9.75151	-0.570032	0.0086601	0.0256162	-1.48456	Cltc	Clathrin heavy chain 1 [Source:UniProtKB/Swiss-Prot;Acc:P11442]	A
ENSRNOG00000004292	-12.4974	-1.70381	2.31e-14	2.13e-13	-3.25759	MGC112883	Small subunit of serine palmitoyltransferase A [Source:UniProtKB/Swiss-Prot;Acc:Q4G019]	A
ENSRNOG00000004294	-33.5897	32.8526	5.9e-47	2.34e-45	7.75587e+09	Ascl1	Achaete-scute homolog 1 [Source:UniProtKB/Swiss-Prot;Acc:P19359]	E
ENSRNOG00000004295	-16.8595	0.860109	0.000345898	0.00128406	1.81517	D3ZU16_RAT	Uncharacterized protein [Source:UniProtKB/TrEMBL;Acc:D3ZU16]	E
ENSRNOG00000004296	-35.7242	28.5836	2.85e-05	0.000122211	4.02281e+08	Nt5c1b	cytosolic 5'-nucleotidase 1B [Source:RefSeq peptide;Acc:NP_001011982]	E
ENSRNOG00000004303	-11.5669	-1.90066	2.27e-17	2.52e-16	-3.73384	Timp3	Metalloproteinase inhibitor 3 [Source:UniProtKB/Swiss-Prot;Acc:P48032]	A
ENSRNOG00000004304	-13.8195	-1.61317	6.18e-13	5.19e-12	-3.05924	Syap1	synapse-associated protein 1 [Source:RefSeq peptide;Acc:NP_001004253]	A
ENSRNOG00000004305	-16.7976	1.06558	9.35e-06	4.26e-05	2.09301	Abl2	tyrosine-protein kinase ABL2 [Source:RefSeq peptide;Acc:NP_001100656]	E
ENSRNOG00000004306	-15.1027	1.58671	4.08e-12	3.25e-11	3.00363	Zbtb39	zinc finger and BTB domain-containing protein 39 [Source:RefSeq peptide;Acc:NP_001124009]	E
ENSRNOG00000004307	-17.1047	-1.14188	2.52e-06	1.22e-05	-2.20668	Tor3a	Torsin-3A [Source:UniProtKB/Swiss-Prot;Acc:Q5M936]	A
ENSRNOG00000004309	-13.1181	-0.743708	0.000684657	0.00243609	-1.67447	Actn1	Alpha-actinin-1 [Source:UniProtKB/Swiss-Prot;Acc:Q9Z1P2]	A
ENSRNOG00000004310	-13.9485	1.53388	8.3e-12	6.47e-11	2.89564	Caskin2	caskin-2 [Source:RefSeq peptide;Acc:NP_001100535]	E
ENSRNOG00000004311	-18.898	1.95206	2.24e-10	1.57e-09	3.86927	Gpr182	G-protein coupled receptor 182 [Source:UniProtKB/Swiss-Prot;Acc:P31392]	E
ENSRNOG00000004312	-13.41	-2.17959	1.02e-21	1.42e-20	-4.53026	Tmbim4	transmembrane BAX inhibitor motif-containing protein 4 [Source:RefSeq peptide;Acc:NP_954547]	A
ENSRNOG00000004317	-18.1797	-1.23423	4.13e-06	1.96e-05	-2.35255	Vipr2	Vasoactive intestinal polypeptide receptor 2 [Source:UniProtKB/Swiss-Prot;Acc:P35000]	A
ENSRNOG00000004319	-16.8858	0.608038	0.0112539	0.0325345	1.52418	None	None	E
ENSRNOG00000004320	-16.5798	-0.697625	0.00288065	0.00924035	-1.62183	Tgm4	Protein-glutamine gamma-glutamyltransferase 4 [Source:UniProtKB/Swiss-Prot;Acc:Q99041]	A
ENSRNOG00000004322	-13.2946	-2.1992	4.49e-22	6.35e-21	-4.59226	Sh3kbp1	SH3 domain-containing kinase-binding protein 1 [Source:UniProtKB/Swiss-Prot;Acc:Q925Q9]	A
ENSRNOG00000004324	-23.5039	-3.25484	0.00259339	0.00836897	-9.54565	None	None	A
ENSRNOG00000004327	-19.5747	2.0078	8.68e-09	5.32e-08	4.02168	Ddc	Aromatic-L-amino-acid decarboxylase [Source:UniProtKB/Swiss-Prot;Acc:P14173]	E
ENSRNOG00000004328	-18.7429	-3.37734	3.26e-29	6.4e-28	-10.3916	Depdc6		A
ENSRNOG00000004330	-17.4146	-1.3442	6.39e-08	3.62e-07	-2.5389	Chrdl1	Chordin-like protein 1 [Source:UniProtKB/Swiss-Prot;Acc:Q76LD0]	A
ENSRNOG00000004337	-12.7696	-0.913709	3.09e-05	0.00013151	-1.88388	Fam20b	glycosaminoglycan xylosylkinase [Source:RefSeq peptide;Acc:NP_001100657]	A
ENSRNOG00000004339	-14.5363	0.861811	0.000108641	0.000432846	1.81732	Yy1	transcriptional repressor protein YY1 [Source:RefSeq peptide;Acc:NP_775412]	E
ENSRNOG00000004341	-36.2243	27.5834	0.00248165	0.00803652	2.01115e+08	LOC498222	Specifically androgen-regulated gene protein [Source:UniProtKB/Swiss-Prot;Acc:Q499V8]	E
ENSRNOG00000004345	-11.515	-0.738364	0.000705604	0.00249706	-1.66828	Daam1	disheveled-associated activator of morphogenesis 1 [Source:RefSeq peptide;Acc:NP_001101500]	A
ENSRNOG00000004346	-16.1783	5.67579	3.25e-88	7.15e-86	51.1192	Notch3	Neurogenic locus notch homolog protein 3Notch 3 extracellular truncationNotch 3 intracellular domain [Source:UniProtKB/Swiss-Prot;Acc:Q9R172]	E
ENSRNOG00000004351	-16.167	-1.802	1.61e-14	1.5e-13	-3.48704	Slc25a29	Mitochondrial carnitine/acylcarnitine carrier protein CACL [Source:UniProtKB/Swiss-Prot;Acc:Q5HZE0]	A
ENSRNOG00000004353	-19.1134	2.0463	7.67e-11	5.57e-10	4.13046	Ppfia2-Tn(sb-T2/Bart3)2.339Mcwi-	liprin-alpha-2 [Source:RefSeq peptide;Acc:NP_001102215]	E
ENSRNOG00000004356	-21.6767	-1.74583	0.00415366	0.0130178	-3.35387	Lrrc52	leucine-rich repeat-containing protein 52 [Source:RefSeq peptide;Acc:NP_001070902]	A
ENSRNOG00000004361	-16.1126	-4.13079	1.18e-57	7.27e-56	-17.5183	LOC100362108	Uncharacterized protein [Source:UniProtKB/TrEMBL;Acc:D3ZZ94]	A
ENSRNOG00000004364	-14.7332	-0.666831	0.00267533	0.00861454	-1.58758	Bre	BRCA1-A complex subunit BRE [Source:UniProtKB/Swiss-Prot;Acc:Q6P7Q1]	A
ENSRNOG00000004367	-13.7585	0.873444	7.57e-05	0.000307781	1.83203	Elk3	ETS domain-containing protein Elk-3 [Source:RefSeq peptide;Acc:NP_001102213]	E
ENSRNOG00000004373	-15.0916	2.28476	1.7e-22	2.45e-21	4.87282	Ddx39	ATP-dependent RNA helicase DDX39 [Source:UniProtKB/Swiss-Prot;Acc:Q5U216]	E
ENSRNOG00000004377	-16.0356	-0.882491	0.000120438	0.000477202	-1.84356	Lpin1	phosphatidate phosphatase LPIN1 [Source:RefSeq peptide;Acc:NP_001012111]	A
ENSRNOG00000004378	-15.2574	-1.76182	1.54e-14	1.44e-13	-3.39125	Abca5	ATP-binding cassette sub-family A member 5 [Source:UniProtKB/Swiss-Prot;Acc:Q8CF82]	A
ENSRNOG00000004390	-21.2804	4.93072	3.93e-19	4.78e-18	30.4997	Alx1	ALX homeobox protein 1 [Source:UniProtKB/Swiss-Prot;Acc:Q63087]	E
ENSRNOG00000004392	-17.3004	1.71412	1.39e-11	1.06e-10	3.28096	Aatk	serine/threonine-protein kinase LMTK1 [Source:RefSeq peptide;Acc:NP_001162174]	E
ENSRNOG00000004395	-12.4143	-0.875393	6.36e-05	0.000260472	-1.83451	Fbxw11	F-box/WD repeat-containing protein 11 [Source:RefSeq peptide;Acc:NP_001100463]	A
ENSRNOG00000004398	-19.2278	2.94266	1.4e-18	1.65e-17	7.6883	D4A9R2_RAT	polycystic kidney and hepatic disease 1-like 1 [Source:RefSeq peptide;Acc:NP_001030103]	E
ENSRNOG00000004400	-21.7798	-2.70142	4.36e-06	2.06e-05	-6.50442	Avpr1a	Vasopressin V1a receptor [Source:UniProtKB/Swiss-Prot;Acc:P30560]	A
ENSRNOG00000004401	-14.1438	-0.575959	0.00893833	0.0263836	-1.49067	Mrpl13	39S ribosomal protein L13, mitochondrial [Source:RefSeq peptide;Acc:NP_001006986]	A
ENSRNOG00000004402	-12.0213	-0.816191	0.000186501	0.000719992	-1.76075	Lpgat1	lysophosphatidylglycerol acyltransferase 1 [Source:RefSeq peptide;Acc:NP_001102846]	A
ENSRNOG00000004403	-15.9562	-1.21279	1.34e-07	7.39e-07	-2.31785	Slc25a32	mitochondrial folate transporter/carrier [Source:RefSeq peptide;Acc:NP_001166805]	A
ENSRNOG00000004405	-20.0424	-2.35178	2.32e-10	1.63e-09	-5.10455	Pigr	Polymeric immunoglobulin receptorSecretory component [Source:UniProtKB/Swiss-Prot;Acc:P15083]	A
ENSRNOG00000004409	-20.118	1.53001	5.33e-05	0.000220488	2.88789	Sash3	SAM and SH3 domain-containing protein 3 [Source:RefSeq peptide;Acc:NP_001128464]	E
ENSRNOG00000004410	-15.3983	0.841928	0.000197815	0.000759989	1.79244	Pax6	Paired box protein Pax-6 [Source:UniProtKB/Swiss-Prot;Acc:P63016]	E
ENSRNOG00000004412	-16.9846	2.32061	5.07e-20	6.46e-19	4.99542	RGD1565672	similar to MDM2 Binding protein (RGD1565672), mRNA [Source:RefSeq DNA;Acc:NM_001130717]	E
ENSRNOG00000004413	-15.8168	0.7702	0.000755311	0.00266081	1.70551	Exosc7	exosome component 7 [Source:RefSeq peptide;Acc:NP_001094195]	E
ENSRNOG00000004414	-14.5469	-2.43556	8.36e-26	1.42e-24	-5.40976	F11r	Junctional adhesion molecule A [Source:UniProtKB/Swiss-Prot;Acc:Q9JHY1]	A
ENSRNOG00000004415	-13.2596	-0.93722	2.03e-05	8.85e-05	-1.91484	Fam179b	Uncharacterized protein [Source:UniProtKB/TrEMBL;Acc:D3ZW60]	A
ENSRNOG00000004417	-14.2642	-0.977973	1.03e-05	4.68e-05	-1.9697	Fam117a	family with sequence similarity 117, member A [Source:RefSeq peptide;Acc:NP_001102509]	A
ENSRNOG00000004419	-14.6485	-1.44303	1.4e-10	9.98e-10	-2.71892	D3ZVF4_RAT	RCG34221, isoform CRA_aUncharacterized protein [Source:UniProtKB/TrEMBL;Acc:D3ZVF4]	A
ENSRNOG00000004421	-15.0594	-1.60363	1.7e-12	1.39e-11	-3.03908	Tmem5	transmembrane protein 5 [Source:RefSeq peptide;Acc:NP_001019930]	A
ENSRNOG00000004425	-17.2228	-1.68284	8.63e-12	6.72e-11	-3.21059	D4AB40_RAT	kelch domain-containing protein 1 [Source:RefSeq peptide;Acc:NP_001101497]	A
ENSRNOG00000004430	-12.9232	1.20875	4.46e-08	2.56e-07	2.31138	Azi1	5-azacytidine-induced protein 1 [Source:RefSeq peptide;Acc:NP_001101780]	E
ENSRNOG00000004433	-12.55	1.09912	5.91e-07	3.05e-06	2.14225	Kdm5b	lysine (K)-specific demethylase 5B [Source:RefSeq peptide;Acc:NP_001100647]	E
ENSRNOG00000004438	-9.16683	-2.28234	7.89e-24	1.21e-22	-4.86467	Cntn1	Contactin-1 [Source:UniProtKB/Swiss-Prot;Acc:Q63198]	A
ENSRNOG00000004440	-18.8282	3.84208	1.42e-31	3.09e-30	14.3411	Fignl1	Fidgetin-like protein 1 [Source:UniProtKB/Swiss-Prot;Acc:Q6GX84]	E
ENSRNOG00000004441	-22.1673	-2.31377	0.000291716	0.0010927	-4.9718	Faim3	Fas apoptotic inhibitory molecule 3 [Source:UniProtKB/Swiss-Prot;Acc:Q5M871]	A
ENSRNOG00000004442	-15.8275	-1.1087	1.25e-06	6.24e-06	-2.15651	RGD1311756	Uncharacterized protein [Source:UniProtKB/TrEMBL;Acc:D4A9W3]	A
ENSRNOG00000004443	-20.677	-4.91031	3.39e-29	6.65e-28	-30.0713	Sptlc3	serine palmitoyltransferase 3 [Source:RefSeq peptide;Acc:NP_001099987]	A
ENSRNOG00000004444	-19.1866	3.80848	2.01e-28	3.8e-27	14.0109	Ikzf1	IKAROS family zinc finger 1 [Source:RefSeq peptide;Acc:NP_001100707]	E
ENSRNOG00000004448	-14.7849	-0.614145	0.00573089	0.0174778	-1.53065	RGD1307051	Putative uncharacterized protein RGD1307051_predictedUncharacterized protein [Source:UniProtKB/TrEMBL;Acc:D3ZDV3]	A
ENSRNOG00000004453	-17.4656	0.998801	7.29e-05	0.000297281	1.99834	RGD1562607	RCG63711Uncharacterized protein [Source:UniProtKB/TrEMBL;Acc:D4AB63]	E
ENSRNOG00000004454	-20.9602	3.1308	2.44e-10	1.71e-09	8.7592	Bdkrb2-m2Mcwi-	B2 bradykinin receptor [Source:UniProtKB/Swiss-Prot;Acc:P25023]	E
ENSRNOG00000004457	-13.4377	0.856828	9.89e-05	0.000396428	1.81105	RGD1560617	Uncharacterized protein [Source:UniProtKB/TrEMBL;Acc:D4AEJ0]	E
ENSRNOG00000004461	-17.2204	0.606544	0.0128936	0.0369126	1.52261	D4AB36_RAT	RCG33321, isoform CRA_bUncharacterized protein [Source:UniProtKB/TrEMBL;Acc:D4AB36]	E
ENSRNOG00000004464	-12.7209	-0.857299	9.06e-05	0.000365046	-1.81164	Sel1l	Protein sel-1 homolog 1 [Source:UniProtKB/Swiss-Prot;Acc:Q80Z70]	A
ENSRNOG00000004466	-14.0322	-1.57431	2.21e-12	1.79e-11	-2.97794	RGD1311378	similar to RIKEN cDNA 2010011I20 (RGD1311378), mRNA [Source:RefSeq DNA;Acc:NM_001106547]	A
ENSRNOG00000004473	-15.5938	-3.03339	5.04e-36	1.31e-34	-8.18731	Ppargc1a	Peroxisome proliferator-activated receptor gamma coactivator 1-alpha [Source:UniProtKB/Swiss-Prot;Acc:Q9QYK2]	A
ENSRNOG00000004476	-18.9626	1.37505	7.85e-06	3.6e-05	2.59378	WIF1_RAT	Wnt inhibitory factor 1 [Source:UniProtKB/Swiss-Prot;Acc:Q6IN38]	E
ENSRNOG00000004477	-13.9793	-0.543665	0.0133945	0.038265	-1.45767	Ublcp1	Ubiquitin-like domain-containing CTD phosphatase 1 [Source:UniProtKB/Swiss-Prot;Acc:Q5FWT7]	A
ENSRNOG00000004478	-10.3264	1.03227	2.38e-06	1.16e-05	2.04524	D4AAC6_RAT	Uncharacterized protein [Source:UniProtKB/TrEMBL;Acc:D4AAC6]	E
ENSRNOG00000004479	-15.2293	1.14096	4.98e-07	2.59e-06	2.20527	Aurka	Serine/threonine-protein kinase 6 [Source:UniProtKB/Swiss-Prot;Acc:P59241]	E
ENSRNOG00000004481	-12.7697	-1.5156	9.11e-12	7.08e-11	-2.85917	Adss	adenylosuccinate synthetase isozyme 2 [Source:RefSeq peptide;Acc:NP_001099445]	A
ENSRNOG00000004487	-19.1239	5.4926	3.12e-50	1.41e-48	45.0234	Nek2	NIMA-related kinase 2 [Source:RefSeq peptide;Acc:NP_446143]	E
ENSRNOG00000004489	-17.1718	3.40403	8.94e-37	2.39e-35	10.5856	Cd97	CD97 antigen [Source:RefSeq peptide;Acc:NP_001012164]	E
ENSRNOG00000004492	-14.6836	-1.02487	4.35e-06	2.05e-05	-2.03478	Mterfd1	mTERF domain-containing protein 1, mitochondrial [Source:UniProtKB/Swiss-Prot;Acc:Q6P6Q6]	A
ENSRNOG00000004493	-16.7092	-1.80964	4.97e-14	4.49e-13	-3.50556	Tasp1	threonine aspartase 1 [Source:RefSeq peptide;Acc:NP_001037708]	A
ENSRNOG00000004497	-21.4682	1.38381	0.0149842	0.0423752	2.60956	Rpl8	60S ribosomal protein L8 [Source:UniProtKB/Swiss-Prot;Acc:P62919]	E
ENSRNOG00000004499	-20.9969	1.75185	0.000358416	0.00132702	3.36791	Gpr135	Probable G-protein coupled receptor 135 [Source:UniProtKB/Swiss-Prot;Acc:Q7TQN7]	E
ENSRNOG00000004500	-18.771	4.33786	6.17e-39	1.8e-37	20.2221	Myc	Myc proto-oncogene protein [Source:UniProtKB/Swiss-Prot;Acc:P09416]	E
ENSRNOG00000004501	-21.5962	1.84983	0.00140817	0.00475503	3.60459	Morc2b	MORC family CW-type zinc finger protein 2B [Source:RefSeq peptide;Acc:NP_001100234]	E
ENSRNOG00000004503	-17.4916	2.75837	7.83e-25	1.27e-23	6.7663	RGD1305721	similar to RIKEN cDNA 2810055F11 (RGD1305721), mRNA [Source:RefSeq DNA;Acc:NM_001108031]	E
ENSRNOG00000004505	-15.5847	-0.954453	2.55e-05	0.000109935	-1.93785	Nfic	nuclear factor 1 C-type [Source:RefSeq peptide;Acc:NP_113755]	A
ENSRNOG00000004508	-16.2661	5.25284	1.85e-78	2.74e-76	38.1295	Pxdn	peroxidasin homolog (Drosophila) Gene [Source:MGI Symbol;Acc:MGI:1916925]	E
ENSRNOG00000004509	-14.3647	-0.959463	1.54e-05	6.84e-05	-1.94459	Eapp	E2F-associated phosphoprotein isoform 1 [Source:RefSeq peptide;Acc:NP_001128459]	A
ENSRNOG00000004510	-13.5133	-0.713311	0.00115023	0.00395193	-1.63956	Slc35b1	Solute carrier family 35 member B1 [Source:UniProtKB/Swiss-Prot;Acc:Q6V7K3]	A
ENSRNOG00000004512	-14.8308	-1.22432	4.9e-08	2.8e-07	-2.33646	Apool	apolipoprotein O-like [Source:RefSeq peptide;Acc:NP_001014127]	A
ENSRNOG00000004515	-14.0286	0.622007	0.00479206	0.0147707	1.53901	Pes1	Pescadillo homolog [Source:UniProtKB/Swiss-Prot;Acc:Q3B8N8]	E
ENSRNOG00000004517	-15.8724	-2.28744	4.12e-22	5.82e-21	-4.88191	Igf1	Insulin-like growth factor I [Source:UniProtKB/Swiss-Prot;Acc:P08025]	A
ENSRNOG00000004520	-13.6503	-0.74996	0.000641857	0.00228933	-1.68175	Wdr60	WD repeat-containing protein 60 [Source:RefSeq peptide;Acc:NP_001178702]	A
ENSRNOG00000004523	-18.6476	1.30028	6.4e-06	2.97e-05	2.46277	Znf250	Uncharacterized protein [Source:UniProtKB/TrEMBL;Acc:D3ZUX9]	E
ENSRNOG00000004524	-15.0147	0.68723	0.00212336	0.00696734	1.61019	Pppde1	PPPDE peptidase domain-containing protein 1 [Source:UniProtKB/Swiss-Prot;Acc:Q5XIT6]	E
ENSRNOG00000004526	-12.3712	-0.624833	0.00416515	0.0130469	-1.54203	Cox7a2l	cytochrome c oxidase subunit VIIa polypeptide 2 like [Source:RefSeq peptide;Acc:NP_001100174]	A
ENSRNOG00000004527	-34.9278	30.1765	3.69e-13	3.15e-12	1.21349e+09	Lin7a	Protein lin-7 homolog A [Source:UniProtKB/Swiss-Prot;Acc:Q9Z250]	E
ENSRNOG00000004531	-19.0089	2.09298	2.6e-11	1.96e-10	4.26628	Tceanc	transcription elongation factor A N-terminal and central domain-containing protein [Source:RefSeq peptide;Acc:NP_001102485]	E
ENSRNOG00000004532	-14.7754	-1.50869	2.31e-11	1.74e-10	-2.84551	Fam69b	Protein FAM69B [Source:UniProtKB/Swiss-Prot;Acc:Q5FVL3]	A
ENSRNOG00000004534	-19.4569	-2.50265	1.63e-14	1.52e-13	-5.66726	Spdya	Speedy protein A [Source:UniProtKB/Swiss-Prot;Acc:Q8R496]	A
ENSRNOG00000004536	-35.7235	-28.5852	1.67e-05	7.36e-05	-4.02717e+08	Bbox1	Gamma-butyrobetaine dioxygenase [Source:UniProtKB/Swiss-Prot;Acc:Q9QZU7]	A
ENSRNOG00000004537	-19.7664	4.22749	3.12e-28	5.84e-27	18.7327	Rxrg	Retinoic acid receptor RXR-gamma [Source:UniProtKB/Swiss-Prot;Acc:Q5BJR8]	E
ENSRNOG00000004540	-20.5072	-0.996251	0.0152043	0.0429481	-1.99481	D3ZUU6_RAT	RCG25681Uncharacterized protein [Source:UniProtKB/TrEMBL;Acc:D3ZUU6]	A
ENSRNOG00000004544	-12.7991	1.12786	3.1e-07	1.65e-06	2.18534	Ube2e3	ubiquitin-conjugating enzyme E2 E3 [Source:RefSeq peptide;Acc:NP_001041322]	E
ENSRNOG00000004549	-12.5027	-0.550715	0.0115211	0.0332637	-1.46481	Dhx40	Probable ATP-dependent RNA helicase DHX40 [Source:UniProtKB/Swiss-Prot;Acc:Q5XI69]	A
ENSRNOG00000004553	-13.9448	-0.933772	2.37e-05	0.00010256	-1.91026	Fam36a	family with sequence similarity 36, member A (Fam36a), mRNA [Source:RefSeq DNA;Acc:NM_001105976]	A
ENSRNOG00000004554	-14.7506	-2.71896	6.8e-31	1.43e-29	-6.58399	Dcn	Decorin [Source:UniProtKB/Swiss-Prot;Acc:Q01129]	A
ENSRNOG00000004555	-17.0251	-5.10824	2.1e-73	2.49e-71	-34.4933	Sec14l4	SEC14-like protein 4 [Source:RefSeq peptide;Acc:NP_001102560]	A
ENSRNOG00000004556	-14.5771	0.553532	0.0125876	0.0360962	1.46767	Dcaf5	WD repeat domain 22 [Source:RefSeq peptide;Acc:NP_001094188]	E
ENSRNOG00000004559	-13.539	1.48836	2.66e-11	2e-10	2.80569	Tuba1a	Tubulin alpha-1A chain [Source:UniProtKB/Swiss-Prot;Acc:P68370]	E
ENSRNOG00000004560	-19.628	1.52087	1.08e-05	4.89e-05	2.86965	Cacna1b	Voltage-dependent N-type calcium channel subunit alpha-1B [Source:UniProtKB/Swiss-Prot;Acc:Q02294]	E
ENSRNOG00000004566	-17.0654	3.64342	2.18e-41	7.02e-40	12.4962	Arhgef15	rho guanine nucleotide exchange factor 15 [Source:RefSeq peptide;Acc:NP_001099259]	E
ENSRNOG00000004571	-19.5325	2.8087	1.97e-15	1.95e-14	7.00652	RGD1563680	Uncharacterized protein [Source:UniProtKB/TrEMBL;Acc:D3ZYC4]	E
ENSRNOG00000004572	-17.1827	0.670918	0.00598925	0.0181793	1.59209	Zfp472	zinc finger protein 472 [Source:RefSeq peptide;Acc:NP_877975]	E
ENSRNOG00000004574	-15.294	0.543067	0.0156061	0.0440116	1.45707	Ofd1	oral-facial-digital syndrome 1 gene homolog [Source:RefSeq peptide;Acc:NP_001100431]	E
ENSRNOG00000004578	-17.9469	6.77597	5.57e-88	1.21e-85	109.59	Cthrc1	Collagen triple helix repeat-containing protein 1 [Source:UniProtKB/Swiss-Prot;Acc:Q8CG08]	E
ENSRNOG00000004581	-12.227	-1.21331	3.58e-08	2.07e-07	-2.31868	Zdhhc9	palmitoyltransferase ZDHHC9 [Source:RefSeq peptide;Acc:NP_001034105]	A
ENSRNOG00000004585	-18.0161	3.98279	1.21e-40	3.79e-39	15.8103	Tmtc2	transmembrane and TPR repeat-containing protein 2 [Source:RefSeq peptide;Acc:NP_001164648]	E
ENSRNOG00000004588	-15.4031	2.0663	1.02e-18	1.21e-17	4.18811	Zbed4	zinc finger BED domain-containing protein 4 [Source:RefSeq peptide;Acc:NP_001128272]	E
ENSRNOG00000004589	-16.3825	4.52734	5.25e-63	3.96e-61	23.0604	Galntl1	putative polypeptide N-acetylgalactosaminyltransferase-like protein 1 [Source:RefSeq peptide;Acc:NP_001094333]	E
ENSRNOG00000004593	-15.61	-0.538952	0.0169979	0.0475863	-1.45292	None		A
ENSRNOG00000004594	-21.5341	-1.79864	0.00142499	0.00480908	-3.47893	Sec14l3	SEC14-like protein 3 [Source:UniProtKB/Swiss-Prot;Acc:Q9Z1J8]	A
ENSRNOG00000004598	-17.1911	1.06271	1.81e-05	7.94e-05	2.08885	Tsen54	tRNA-splicing endonuclease subunit Sen54 [Source:RefSeq peptide;Acc:NP_001103046]	E
ENSRNOG00000004602	-12.2784	0.690792	0.00155317	0.00520648	1.61417	Rnf145	RING finger protein 145 [Source:RefSeq peptide;Acc:NP_001099248]	E
ENSRNOG00000004603	-18.9801	5.53715	3.95e-53	2e-51	46.4354	Srgap1	SLIT-ROBO Rho GTPase-activating protein 1 [Source:RefSeq peptide;Acc:NP_001178713]	E
ENSRNOG00000004606	-18.2059	0.749294	0.00541995	0.0165914	1.68097	Meis1	homeobox protein Meis1 [Source:RefSeq peptide;Acc:NP_001128174]	E
ENSRNOG00000004608	-15.8312	-0.759485	0.000849547	0.00296517	-1.69289	Magmas	mitochondria-associated granulocyte macrophage CSF signaling molecule [Source:RefSeq peptide;Acc:NP_001093606]	A
ENSRNOG00000004610	-14.3755	3.63938	7.33e-50	3.3e-48	12.4612	Lum	Lumican [Source:UniProtKB/Swiss-Prot;Acc:P51886]	E
ENSRNOG00000004612	-11.656	-0.672761	0.00201442	0.00663794	-1.59412	Ppp1cb	Serine/threonine-protein phosphatase PP1-beta catalytic subunit [Source:UniProtKB/Swiss-Prot;Acc:P62142]	A
ENSRNOG00000004616	-13.4324	0.767163	0.00047983	0.00174027	1.70192	Npm1	Nucleophosmin [Source:UniProtKB/Swiss-Prot;Acc:P13084]	E
ENSRNOG00000004617	-13.817	0.91621	3.37e-05	0.000142983	1.88715	Fmnl2		E
ENSRNOG00000004621	-10.5374	-1.49601	1.35e-11	1.04e-10	-2.82062	Rtn4	Reticulon-4 [Source:UniProtKB/Swiss-Prot;Acc:Q9JK11]	A
ENSRNOG00000004622	-16.4902	3.1758	1.5e-35	3.83e-34	9.03672	Calcrl	Calcitonin gene-related peptide type 1 receptor [Source:UniProtKB/Swiss-Prot;Acc:Q63118]	E
ENSRNOG00000004624	-15.357	2.92951	8.76e-34	2.11e-32	7.61854	Rnd3	Rho-related GTP-binding protein RhoE [Source:UniProtKB/Swiss-Prot;Acc:Q6SA80]	E
ENSRNOG00000004626	-19.1161	2.61471	1.84e-15	1.82e-14	6.12499	Slc34a2	Sodium-dependent phosphate transport protein 2B [Source:UniProtKB/Swiss-Prot;Acc:Q9JJ09]	E
ENSRNOG00000004640	-17.9757	-1.74382	2.94e-11	2.2e-10	-3.34921	Mtp18	mitochondrial 18 kDa protein [Source:RefSeq peptide;Acc:NP_001006961]	A
ENSRNOG00000004645	-20.6829	1.89284	2.06e-05	9e-05	3.71365	Galnt5	Polypeptide N-acetylgalactosaminyltransferase 5 [Source:UniProtKB/Swiss-Prot;Acc:O88422]	E
ENSRNOG00000004649	-22.3824	-3.50271	5.49e-07	2.84e-06	-11.335	Il1b	Interleukin-1 beta [Source:UniProtKB/Swiss-Prot;Acc:Q63264]	A
ENSRNOG00000004650	-19.6333	2.91466	2.87e-16	2.97e-15	7.54052	Begain	Brain-enriched guanylate kinase-associated protein [Source:UniProtKB/Swiss-Prot;Acc:O88881]	E
ENSRNOG00000004666	-19.4545	5.4207	1.3e-44	4.77e-43	42.8345	Prr5l	Proline-rich protein 5-like [Source:UniProtKB/Swiss-Prot;Acc:A1L1K1]	E
ENSRNOG00000004667	-17.5892	3.87531	3.08e-42	1.02e-40	14.6752	Gen1	flap endonuclease GEN homolog 1 [Source:RefSeq peptide;Acc:NP_001100187]	E
ENSRNOG00000004668	-20.2049	-1.36835	0.000354305	0.00131296	-2.58175	Slc25a35	solute carrier family 25 member 35 [Source:RefSeq peptide;Acc:NP_001102503]	A
ENSRNOG00000004670	-15.4184	0.703764	0.0018425	0.00610212	1.62875	Ddx56	probable ATP-dependent RNA helicase DDX56 [Source:RefSeq peptide;Acc:NP_001004211]	E
ENSRNOG00000004671	-20.5555	1.93025	9.87e-06	4.48e-05	3.8112	Kif4b	Uncharacterized protein [Source:UniProtKB/TrEMBL;Acc:D3ZYT4]	E
ENSRNOG00000004672	-15.3618	-0.700593	0.0018179	0.00602946	-1.62517	Sec14l2	SEC14-like protein 2 [Source:UniProtKB/Swiss-Prot;Acc:Q99MS0]	A
ENSRNOG00000004673	-16.7003	-1.00376	2.21e-05	9.59e-05	-2.00522	Rbm43	RNA-binding protein 43 [Source:UniProtKB/Swiss-Prot;Acc:Q3B7D9]	A
ENSRNOG00000004676	-18.4014	6.06851	2.85e-70	2.92e-68	67.1126	Pak3	Serine/threonine-protein kinase PAK 3 [Source:UniProtKB/Swiss-Prot;Acc:Q62829]	E
ENSRNOG00000004677	-16.4028	4.11599	6.51e-54	3.38e-52	17.3395	Zeb2	zinc finger E-box-binding homeobox 2 [Source:RefSeq peptide;Acc:NP_001028873]	E
ENSRNOG00000004679	-17.3824	2.57277	1.97e-22	2.83e-21	5.94951	Fign	fidgetin [Source:RefSeq peptide;Acc:NP_001099954]	E
ENSRNOG00000004681	-13.5002	-0.912327	3.41e-05	0.000144449	-1.88208	Eny2	enhancer of yellow 2 transcription factor homolog [Source:RefSeq peptide;Acc:NP_001124052]	A
ENSRNOG00000004682	-18.5163	4.35229	6.16e-42	2.02e-40	20.4253	LOC100310874	UPF0419 protein C12orf48 homolog [Source:UniProtKB/Swiss-Prot;Acc:Q9EQ10]	E
ENSRNOG00000004686	-12.9926	-1.08793	7.81e-07	3.98e-06	-2.12568	Spop	speckle-type POZ protein [Source:RefSeq peptide;Acc:NP_001093966]	A
ENSRNOG00000004687	-17.6863	0.667709	0.00841048	0.0249279	1.58855	Thbd	thrombomodulin [Source:RefSeq peptide;Acc:NP_113959]	E
ENSRNOG00000004688	-15.6897	1.33034	7.95e-09	4.89e-08	2.51463	Rbm9	RNA-binding protein 9 [Source:UniProtKB/Swiss-Prot;Acc:A1A5R1]	E
ENSRNOG00000004693	-13.7916	1.05839	1.77e-06	8.73e-06	2.0826	Pbx1	pre-B-cell leukemia transcription factor 1 isoform b [Source:RefSeq peptide;Acc:NP_001094151]	E
ENSRNOG00000004695	-18.1014	2.36423	2.23e-17	2.48e-16	5.14877	Brunol5	CUG-BP- and ETR-3-like factor 5 [Source:RefSeq peptide;Acc:NP_001129075]	E
ENSRNOG00000004696	-11.9719	-0.660382	0.00244704	0.00796735	-1.5805	Arhgap5	rho GTPase-activating protein 5 [Source:RefSeq peptide;Acc:NP_001041334]	A
ENSRNOG00000004697	-19.3615	-0.940122	0.00370434	0.0117005	-1.91869	BAALC_RAT	Brain and acute leukemia cytoplasmic protein [Source:UniProtKB/Swiss-Prot;Acc:Q920K5]	A
ENSRNOG00000004698	-22.7825	3.09907	0.000461461	0.00167985	8.56869	LOC685808		E
ENSRNOG00000004700	-15.9703	1.16753	4.9e-07	2.55e-06	2.24627	Nxt1	NTF2-related export protein 1 [Source:RefSeq peptide;Acc:NP_001099991]	E
ENSRNOG00000004705	-19.8481	-1.45843	3.42e-05	0.000144946	-2.74809	O88596_RAT	Sertoli cell protein [Source:UniProtKB/TrEMBL;Acc:O88596]	A
ENSRNOG00000004706	-19.8546	5.7802	5.14e-43	1.78e-41	54.9559	Vit		E
ENSRNOG00000004707	-19.1375	1.16661	0.000202212	0.000775264	2.24484	D3ZVW9_RAT	Uncharacterized protein [Source:UniProtKB/TrEMBL;Acc:D3ZVW9]	E
ENSRNOG00000004708	-16.7371	2.77979	7.75e-28	1.42e-26	6.86751	Aard	Alanine and arginine-rich domain-containing protein [Source:UniProtKB/Swiss-Prot;Acc:Q91ZF7]	E
ENSRNOG00000004709	-15.4681	1.35792	3.17e-09	2.02e-08	2.56316	Foxn3	forkhead box protein N3 [Source:RefSeq peptide;Acc:NP_001101517]	E
ENSRNOG00000004710	-16.1833	-0.731514	0.0015306	0.0051361	-1.66038	Rbks	ribokinase [Source:RefSeq peptide;Acc:NP_001102173]	A
ENSRNOG00000004711	-13.1625	0.803419	0.00025111	0.00095123	1.74523	Mta1	Metastasis-associated protein MTA1 [Source:UniProtKB/Swiss-Prot;Acc:Q62599]	E
ENSRNOG00000004712	-20.5862	1.15414	0.00787701	0.0234528	2.22552	Angptl1	angiopoietin-related protein 1 [Source:RefSeq peptide;Acc:NP_001102853]	E
ENSRNOG00000004713	-21.8264	-5.44282	9.37e-20	1.18e-18	-43.4962	Kcnj16	Inward rectifier potassium channel 16 [Source:UniProtKB/Swiss-Prot;Acc:P52191]	A
ENSRNOG00000004719	-17.0872	-0.844928	0.000455795	0.00166045	-1.79617	RGD1564811	Putative uncharacterized protein RGD1564811_predictedUncharacterized protein [Source:UniProtKB/TrEMBL;Acc:D3ZZT7]	A
ENSRNOG00000004720	-20.4621	2.57244	2.91e-09	1.86e-08	5.94813	Kcnj2	Inward rectifier potassium channel 2 [Source:UniProtKB/Swiss-Prot;Acc:Q64273]	E
ENSRNOG00000004725	-19.7347	-4.14482	3.51e-31	7.51e-30	-17.6894	Cela1	Chymotrypsin-like elastase family member 1 [Source:UniProtKB/Swiss-Prot;Acc:P00773]	A
ENSRNOG00000004730	-18.3614	5.16487	4.65e-56	2.66e-54	35.874	Meis2	homeobox protein Meis2 [Source:RefSeq peptide;Acc:NP_001101228]	E
ENSRNOG00000004731	-20.7627	1.73077	0.000148646	0.000581931	3.31905	Ano3-Tn(sb-T2/Bart3)2.307Mcwi-		E
ENSRNOG00000004735	-14.0844	-0.91031	3.82e-05	0.000161041	-1.87945	Gzf1	GDNF-inducible zinc finger protein 1 [Source:RefSeq peptide;Acc:NP_001101258]	A
ENSRNOG00000004736	-16.4985	3.05518	2.22e-33	5.24e-32	8.31189	Ralgps2	Ral GEF with PH domain and SH3 binding motif 2 [Source:RefSeq peptide;Acc:NP_001094150]	E
ENSRNOG00000004737	-15.1075	0.849685	0.000156838	0.000611242	1.80211	Cd48	CD48 antigen [Source:UniProtKB/Swiss-Prot;Acc:P10252]	E
ENSRNOG00000004740	-13.7133	-0.580343	0.00817634	0.0242852	-1.4952	Mmadhc	Methylmalonic aciduria and homocystinuria type D homolog, mitochondrial [Source:UniProtKB/Swiss-Prot;Acc:Q6AYQ6]	A
ENSRNOG00000004741	-13.3699	0.570031	0.00928051	0.0271813	1.48456	Rpl19	60S ribosomal protein L19 [Source:UniProtKB/Swiss-Prot;Acc:P84100]	E
ENSRNOG00000004742	-17.0188	-1.04937	1.36e-05	6.06e-05	-2.06962	Chp	Calcium-binding protein p22 [Source:UniProtKB/Swiss-Prot;Acc:P61023]	A
ENSRNOG00000004743	-36.2816	27.4688	0.00248165	0.00803652	1.85758e+08	Cdcp1	CUB domain-containing protein 1 [Source:RefSeq peptide;Acc:NP_001100339]	E
ENSRNOG00000004744	-13.9832	1.56337	3.46e-12	2.77e-11	2.95543	Fam84b	Uncharacterized protein [Source:UniProtKB/TrEMBL;Acc:D3ZV96]	E
ENSRNOG00000004751	-14.3896	-1.35872	1.28e-09	8.45e-09	-2.56457	Jkamp	JNK1/MAPK8-associated membrane protein [Source:RefSeq peptide;Acc:NP_001100208]	A
ENSRNOG00000004754	-13.3123	-2.71736	1.32e-31	2.88e-30	-6.5767	D4A866_RAT	membrane targeting (tandem) C2 domain containing 1 [Source:RefSeq peptide;Acc:NP_001020323]	A
ENSRNOG00000004755	-14.7231	-0.67892	0.00221687	0.0072588	-1.60094	Commd9	COMM domain-containing protein 9 [Source:RefSeq peptide;Acc:NP_001028864]	A
ENSRNOG00000004757	-19.1289	2.14307	3.89e-11	2.88e-10	4.41701	Tmem158	Transmembrane protein 158 [Source:UniProtKB/Swiss-Prot;Acc:Q91XV7]	E
ENSRNOG00000004761	-21.5006	2.50358	7.98e-06	3.66e-05	5.67089	Slamf1	signaling lymphocytic activation molecule [Source:RefSeq peptide;Acc:NP_001102548]	E
ENSRNOG00000004763	-15.0694	0.72287	0.00125318	0.00427921	1.65046	Sirpa	Tyrosine-protein phosphatase non-receptor type substrate 1 [Source:UniProtKB/Swiss-Prot;Acc:P97710]	E
ENSRNOG00000004766	-14.5815	0.673336	0.00241826	0.00787973	1.59476	Glis2	zinc finger protein GLIS2 [Source:RefSeq peptide;Acc:NP_001100448]	E
ENSRNOG00000004772	-20.1677	-2.31591	9.4e-10	6.26e-09	-4.97919	Cytip	Cytohesin-interacting protein [Source:UniProtKB/Swiss-Prot;Acc:Q5I0L6]	A
ENSRNOG00000004774	-16.7906	-2.80944	3.18e-29	6.25e-28	-7.0101	LOC500668	Uncharacterized protein C14orf38 homolog [Source:UniProtKB/Swiss-Prot;Acc:Q5PQJ9]	A
ENSRNOG00000004775	-15.111	1.17938	1.88e-07	1.02e-06	2.26479	Cstf1	Cleavage stimulation factor subunit 1 [Source:UniProtKB/Swiss-Prot;Acc:Q5BJQ6]	E
ENSRNOG00000004777	-13.5499	-0.614438	0.00508122	0.015603	-1.53096	Esf1	ESF1 homolog [Source:UniProtKB/Swiss-Prot;Acc:Q76MT4]	A
ENSRNOG00000004778	-18.5661	2.56473	8.39e-18	9.54e-17	5.91644	Cnga1	cGMP-gated cation channel alpha-1 [Source:UniProtKB/Swiss-Prot;Acc:Q62927]	E
ENSRNOG00000004781	-16.6444	4.93738	2.28e-69	2.24e-67	30.6408	Crmp1	Dihydropyrimidinase-related protein 1 [Source:UniProtKB/Swiss-Prot;Acc:Q62950]	E
ENSRNOG00000004784	-15.8922	-0.689959	0.00249496	0.00807697	-1.61324	RGD1309829	Probable methyltransferase C20orf7 homolog, mitochondrial [Source:UniProtKB/Swiss-Prot;Acc:B2GV71]	A
ENSRNOG00000004786	-21.2418	-3.7782	2.92e-14	2.67e-13	-13.7199	Cyp4f1	Cytochrome P450 4F1 [Source:UniProtKB/Swiss-Prot;Acc:P33274]	A
ENSRNOG00000004793	-14.0308	1.22802	3.6e-08	2.08e-07	2.34246	Ncln	Nicalin [Source:UniProtKB/Swiss-Prot;Acc:Q5XIA1]	E
ENSRNOG00000004794	-13.8465	-0.915647	3.36e-05	0.000142348	-1.88642	RTN1_RAT	Reticulon-1 [Source:UniProtKB/Swiss-Prot;Acc:Q64548]	A
ENSRNOG00000004795	-36.4878	27.0566	0.0175039	0.0485142	1.39586e+08	Pof1b	protein POF1B [Source:RefSeq peptide;Acc:NP_001100404]	E
ENSRNOG00000004805	-20.0882	3.09942	4.66e-15	4.49e-14	8.57071	Stac2	SH3 and cysteine-rich domain-containing protein 2 [Source:RefSeq peptide;Acc:NP_001102304]	E
ENSRNOG00000004810	-17.3924	2.78291	1.15e-25	1.94e-24	6.88238	Plcb1	1-phosphatidylinositol-4,5-bisphosphate phosphodiesterase beta-1 [Source:UniProtKB/Swiss-Prot;Acc:P10687]	E
ENSRNOG00000004812	-14.5848	1.89832	1.07e-16	1.14e-15	3.72779	Sema6d	semaphorin-6D [Source:RefSeq peptide;Acc:NP_001101238]	E
ENSRNOG00000004819	-15.9498	-0.986044	1.67e-05	7.37e-05	-1.98075	Porcn	porcupine homolog [Source:RefSeq peptide;Acc:NP_001166826]	A
ENSRNOG00000004820	-13.0461	-1.67853	5.98e-14	5.37e-13	-3.20103	Sar1b	GTP-binding protein SAR1b [Source:UniProtKB/Swiss-Prot;Acc:Q5HZY2]	A
ENSRNOG00000004823	-16.5841	4.0254	2.4e-51	1.13e-49	16.2842	Dock4	dedicator of cytokinesis 4 Gene [Source:MGI Symbol;Acc:MGI:1918006]	E
ENSRNOG00000004828	-36.2724	-27.4874	0.00908224	0.0266536	-1.88158e+08	Acvr1c	Activin receptor type-1C [Source:UniProtKB/Swiss-Prot;Acc:P70539]	A
ENSRNOG00000004831	-13.7936	1.41517	2.36e-10	1.65e-09	2.66691	Arid2	Uncharacterized protein [Source:UniProtKB/TrEMBL;Acc:D3ZJU0]	E
ENSRNOG00000004834	-14.4354	-0.740328	0.000818561	0.00286856	-1.67056	Llgl2	lethal(2) giant larvae protein homolog 2 [Source:RefSeq peptide;Acc:NP_001121021]	A
ENSRNOG00000004837	-13.8014	0.763507	0.000531527	0.00191528	1.69761	Limd1	LIM domain-containing protein 1 [Source:RefSeq peptide;Acc:NP_001106208]	E
ENSRNOG00000004839	-20.8631	1.55544	0.000611365	0.00218613	2.93923	B4galnt1	Beta-1,4 N-acetylgalactosaminyltransferase 1 [Source:UniProtKB/Swiss-Prot;Acc:Q10468]	E
ENSRNOG00000004840	-16.2856	1.7444	2.4e-13	2.07e-12	3.35056	D3ZE19_RAT	Protein tyrosine phosphatase, receptor type, B (Predicted), isoform CRA_bUncharacterized protein [Source:UniProtKB/TrEMBL;Acc:D3ZE19]	E
ENSRNOG00000004841	-15.6432	4.17002	1.27e-58	8.21e-57	18.0011	Akap6	A-kinase anchor protein 6 [Source:UniProtKB/Swiss-Prot;Acc:Q9WVC7]	E
ENSRNOG00000004842	-15.845	-0.876854	0.000121292	0.00048033	-1.83637	Dnajc24	dnaJ homolog subfamily C member 24 [Source:RefSeq peptide;Acc:NP_001178782]	A
ENSRNOG00000004843	-16.9663	0.734727	0.00239522	0.00780726	1.66408	LOC100362333	DNA polymerase epsilon subunit 3 [Source:UniProtKB/Swiss-Prot;Acc:Q642A5]	E
ENSRNOG00000004846	-13.057	-1.66129	1.05e-13	9.27e-13	-3.16299	Atp6v1c1	V-type proton ATPase subunit C 1 [Source:UniProtKB/Swiss-Prot;Acc:Q5FVI6]	A
ENSRNOG00000004854	-34.2453	31.5415	3.59e-27	6.47e-26	3.12557e+09	Has2	Hyaluronan synthase 2 [Source:UniProtKB/Swiss-Prot;Acc:O35776]	E
ENSRNOG00000004855	-18.4442	-1.80128	7.09e-11	5.17e-10	-3.48529	None		A
ENSRNOG00000004857	-15.5574	-2.1423	4.66e-20	5.96e-19	-4.41466	L2hgdh	L-2-hydroxyglutarate dehydrogenase, mitochondrial [Source:RefSeq peptide;Acc:NP_001101498]	A
ENSRNOG00000004860	-10.8796	0.55432	0.0107497	0.0311562	1.46848	Myh9	Myosin-9 [Source:UniProtKB/Swiss-Prot;Acc:Q62812]	E
ENSRNOG00000004861	-18.3917	5.09945	1.27e-54	6.82e-53	34.2836	Itga4	integrin alpha-4 [Source:RefSeq peptide;Acc:NP_001101207]	E
ENSRNOG00000004863	-16.559	3.43609	3.03e-40	9.36e-39	10.8235	Mpped2	Metallophosphoesterase MPPED2 [Source:UniProtKB/Swiss-Prot;Acc:B1WBP0]	E
ENSRNOG00000004865	-36.4898	27.0525	0.0175039	0.0485142	1.39196e+08	Pkd1l1		E
ENSRNOG00000004874	-13.8997	0.989412	7.88e-06	3.62e-05	1.98538	Flrt3	Leucine-rich repeat transmembrane protein FLRT3 [Source:UniProtKB/Swiss-Prot;Acc:B1H234]	E
ENSRNOG00000004880	-17.7616	-1.0852	1.97e-05	8.61e-05	-2.12167	None		A
ENSRNOG00000004883	-13.5226	0.919161	3.04e-05	0.00012951	1.89102	Erh	enhancer of rudimentary homolog [Source:RefSeq peptide;Acc:NP_001102912]	E
ENSRNOG00000004889	-15.1314	3.45026	1.58e-44	5.77e-43	10.9303	Vangl2	Vang-like protein 2 [Source:UniProtKB/Swiss-Prot;Acc:P84889]	E
ENSRNOG00000004890	-20.6103	2.04399	2.8e-06	1.35e-05	4.12386	Adcy8	Adenylate cyclase type 8 [Source:UniProtKB/Swiss-Prot;Acc:P40146]	E
ENSRNOG00000004891	-14.9221	-0.817426	0.000249579	0.000945674	-1.76226	RGD1311463	Uncharacterized protein C11orf46 homolog [Source:UniProtKB/Swiss-Prot;Acc:Q5FVK8]	A
ENSRNOG00000004893	-15.4491	-2.10449	1.43e-19	1.79e-18	-4.30046	Atp5s	ATP synthase subunit s, mitochondrial [Source:UniProtKB/Swiss-Prot;Acc:Q5XIM4]	A
ENSRNOG00000004899	-20.2714	1.08316	0.00813488	0.0241669	2.11867	Kcns3	Potassium voltage-gated channel subfamily S member 3 [Source:UniProtKB/Swiss-Prot;Acc:O88759]	E
ENSRNOG00000004900	-36.1677	27.6968	0.00130666	0.00443409	2.17555e+08	Crhr1	Corticotropin-releasing factor receptor 1 [Source:UniProtKB/Swiss-Prot;Acc:P35353]	E
ENSRNOG00000004903	-15.9837	-2.14891	9.2e-20	1.16e-18	-4.43493	Ebp	3-beta-hydroxysteroid-Delta(8),Delta(7)-isomerase [Source:UniProtKB/Swiss-Prot;Acc:Q9JJ46]	A
ENSRNOG00000004904	-13.4636	1.08331	9.6e-07	4.85e-06	2.11889	Pa2g4	proliferation-associated protein 2G4 [Source:RefSeq peptide;Acc:NP_001004206]	E
ENSRNOG00000004908	-12.9834	-0.774944	0.00040285	0.00147854	-1.71112	Smc6	structural maintenance of chromosomes protein 6 [Source:RefSeq peptide;Acc:NP_001101484]	A
ENSRNOG00000004910	-15.5644	0.574941	0.0110376	0.0319436	1.48962	Lgtn	Ligatin [Source:UniProtKB/Swiss-Prot;Acc:Q5PPG7]	E
ENSRNOG00000004911	-13.3616	-0.741916	0.000717322	0.0025364	-1.6724	Psmd14	26S proteasome non-ATPase regulatory subunit 14 [Source:RefSeq peptide;Acc:NP_001020860]	A
ENSRNOG00000004912	-13.7821	-1.32384	2.62e-09	1.68e-08	-2.50332	Itgav	integrin alpha V Gene [Source:MGI Symbol;Acc:MGI:96608]	A
ENSRNOG00000004919	-13.2523	-0.643712	0.00327366	0.0104205	-1.56234	Gns	N-acetylglucosamine-6-sulfatase [Source:RefSeq peptide;Acc:NP_001011989]	A
ENSRNOG00000004921	-18.8235	9.84671	6.16e-117	3.86e-114	920.779	Nusap1	nucleolar and spindle-associated protein 1 [Source:RefSeq peptide;Acc:NP_001101232]	E
ENSRNOG00000004925	-13.9599	0.589013	0.00745524	0.0222984	1.50422	MYPT1_RAT	Protein phosphatase 1 regulatory subunit 12A [Source:UniProtKB/Swiss-Prot;Acc:Q10728]	E
ENSRNOG00000004932	-17.5107	3.3091	2.67e-33	6.31e-32	9.91147	Sel1l3	Uncharacterized protein [Source:UniProtKB/TrEMBL;Acc:D3ZIJ4]	E
ENSRNOG00000004936	-11.4929	-0.69729	0.00137167	0.00464028	-1.62146	Sdc2	Syndecan-2 [Source:UniProtKB/Swiss-Prot;Acc:P34900]	A
ENSRNOG00000004939	-18.7401	1.006	0.000718485	0.0025402	2.00834	Ttll6	Uncharacterized protein [Source:UniProtKB/TrEMBL;Acc:D3ZJ17]	E
ENSRNOG00000004940	-14.3778	-0.935399	2.48e-05	0.000107198	-1.91242	Rnf215	RING finger protein 215 [Source:RefSeq peptide;Acc:NP_001100704]	A
ENSRNOG00000004947	-15.1027	0.897185	6.63e-05	0.000271321	1.86243	LOC100364912		E
ENSRNOG00000004951	-13.6923	-1.13354	2.99e-07	1.59e-06	-2.19396	Kif16b	kinesin family member 16B [Source:RefSeq peptide;Acc:NP_001101253]	A
ENSRNOG00000004956	-16.6388	-2.57379	1.06e-25	1.79e-24	-5.95371	Phf15	protein Jade-2 [Source:RefSeq peptide;Acc:NP_001100468]	A
ENSRNOG00000004962	-14.9377	0.851406	0.000144334	0.00056663	1.80426	Prdm4	PR domain zinc finger protein 4 [Source:UniProtKB/Swiss-Prot;Acc:Q9QZP2]	E
ENSRNOG00000004964	-20.6326	1.78331	8.64e-05	0.000349539	3.44214	Erbb3	Receptor tyrosine-protein kinase erbB-3 [Source:UniProtKB/Swiss-Prot;Acc:Q62799]	E
ENSRNOG00000004966	-15.018	2.3973	1.94e-24	3.08e-23	5.26816	Slc38a11	Uncharacterized protein [Source:UniProtKB/TrEMBL;Acc:D3Z813]	E
ENSRNOG00000004968	-15.8766	1.26086	5.11e-08	2.91e-07	2.39639	Ncapg2	Uncharacterized protein [Source:UniProtKB/TrEMBL;Acc:D4AAL2]	E
ENSRNOG00000004992	-11.7119	-0.850393	9.89e-05	0.000396222	-1.80299	Rab1	Ras-related protein Rab-1A [Source:UniProtKB/Swiss-Prot;Acc:Q6NYB7]	A
ENSRNOG00000004998	-20.4508	1.94986	3.55e-06	1.69e-05	3.86338	Jakmip1	Janus kinase and microtubule-interacting protein 1 [Source:UniProtKB/Swiss-Prot;Acc:Q3SWS9]	E
ENSRNOG00000005003	-16.7895	0.591292	0.0128427	0.0367777	1.5066	Ptprn2	Receptor-type tyrosine-protein phosphatase N2 [Source:UniProtKB/Swiss-Prot;Acc:Q63475]	E
ENSRNOG00000005006	-15.3656	-1.22319	6.82e-08	3.85e-07	-2.33463	Ndufaf1	complex I intermediate-associated protein 30, mitochondrial [Source:RefSeq peptide;Acc:NP_001099970]	A
ENSRNOG00000005007	-20.1705	1.69335	1.29e-05	5.76e-05	3.23407	Scn3a	sodium channel protein type 3 subunit alpha [Source:RefSeq peptide;Acc:NP_037251]	E
ENSRNOG00000005008	-21.7657	2.48521	6.73e-05	0.000274956	5.59916	Angpt4	angiopoietin-4 [Source:RefSeq peptide;Acc:NP_001099996]	E
ENSRNOG00000005015	-13.3688	-0.986454	7.46e-06	3.43e-05	-1.98131	Rabep1	Rab GTPase-binding effector protein 1 [Source:UniProtKB/Swiss-Prot;Acc:O35550]	A
ENSRNOG00000005016	-12.9066	-1.56375	2.17e-12	1.76e-11	-2.95622	Tmed4	transmembrane emp24 domain-containing protein 4 [Source:RefSeq peptide;Acc:NP_001100708]	A
ENSRNOG00000005021	-14.9439	-0.983284	1.15e-05	5.18e-05	-1.97696	Orc4l	Origin recognition complex subunit 4 [Source:UniProtKB/Swiss-Prot;Acc:Q6P9Z8]	A
ENSRNOG00000005024	-13.937	0.541738	0.0137994	0.0393608	1.45572	Cdkn2aipnl	CDKN2AIP N-terminal-like protein [Source:UniProtKB/Swiss-Prot;Acc:Q5RK03]	E
ENSRNOG00000005028	-16.3108	-1.06189	4.93e-06	2.32e-05	-2.08766	LOC100361891	None	A
ENSRNOG00000005031	-16.6525	0.916978	0.000114626	0.000455276	1.88816	Surf6	surfeit locus protein 6 [Source:RefSeq peptide;Acc:NP_001015014]	E
ENSRNOG00000005032	-14.1233	-0.627717	0.00438757	0.0136985	-1.54512	Ppp1r12b	protein phosphatase 1 regulatory subunit 12B [Source:RefSeq peptide;Acc:NP_001100648]	A
ENSRNOG00000005034	-15.0887	1.42827	3.51e-10	2.42e-09	2.69124	D3ZNV3_RAT	Uncharacterized protein [Source:UniProtKB/TrEMBL;Acc:D3ZJV5]	E
ENSRNOG00000005036	-14.937	1.62677	1.03e-12	8.54e-12	3.08821	LOC500625	Uncharacterized protein [Source:UniProtKB/TrEMBL;Acc:D4A9R0]	E
ENSRNOG00000005037	-16.7463	2.51043	1.61e-23	2.42e-22	5.6979	Kif18a	kinesin-like protein KIF18A [Source:RefSeq peptide;Acc:NP_001131114]	E
ENSRNOG00000005038	-19.6459	6.72844	8.4e-58	5.2e-56	106.038	Ube2t	ubiquitin-conjugating enzyme E2 T [Source:RefSeq peptide;Acc:NP_001101814]	E
ENSRNOG00000005039	-14.0343	-0.893522	5.24e-05	0.000217025	-1.85771	Tfpi	Tissue factor pathway inhibitor [Source:UniProtKB/Swiss-Prot;Acc:Q02445]	A
ENSRNOG00000005043	-12.8033	-1.5828	1.19e-12	9.8e-12	-2.99551	D3ZHK8_RAT	Cytoplasmic polyadenylation element binding protein 2 (Predicted)Uncharacterized protein [Source:UniProtKB/TrEMBL;Acc:D3ZHK8]	A
ENSRNOG00000005045	-12.9561	-0.780296	0.000367626	0.00135449	-1.71748	Ppp2r5e	serine/threonine-protein phosphatase 2A 56 kDa regulatory subunit epsilon isoform [Source:RefSeq peptide;Acc:NP_001100210]	A
ENSRNOG00000005046	-11.8643	-1.75622	3.66e-15	3.56e-14	-3.37812	Tspan13	Tetraspanin-13 [Source:UniProtKB/Swiss-Prot;Acc:Q5FVL6]	A
ENSRNOG00000005048	-21.1267	3.77612	3.23e-13	2.77e-12	13.7001	Trhr	Thyrotropin-releasing hormone receptor [Source:UniProtKB/Swiss-Prot;Acc:Q01717]	E
ENSRNOG00000005049	-20.0897	6.49245	1.54e-48	6.51e-47	90.0371	Tbr1	T-box brain protein 1 [Source:RefSeq peptide;Acc:NP_001177999]	E
ENSRNOG00000005053	-17.3005	1.28106	3.15e-07	1.68e-06	2.43018	Egln3	Egl nine homolog 3, mitochondrial [Source:UniProtKB/Swiss-Prot;Acc:Q62630]	E
ENSRNOG00000005059	-15.4213	0.605713	0.00730898	0.021892	1.52173	Med22	Mediator of RNA polymerase II transcription subunit 22 [Source:UniProtKB/Swiss-Prot;Acc:A0JPN6]	E
ENSRNOG00000005061	-12.0612	-1.227	2.51e-08	1.48e-07	-2.34079	Dlst	Dihydrolipoyllysine-residue succinyltransferase component of 2-oxoglutarate dehydrogenase complex, mitochondrial [Source:UniProtKB/Swiss-Prot;Acc:Q01205]	A
ENSRNOG00000005062	-13.1795	0.796662	0.000282851	0.00106151	1.73708	None		E
ENSRNOG00000005063	-17.1854	-1.05484	1.58e-05	7.01e-05	-2.07749	Atl1	Atlastin-1 [Source:UniProtKB/Swiss-Prot;Acc:Q6PST4]	A
ENSRNOG00000005064	-12.7625	-0.928391	2.31e-05	0.000100003	-1.90315	Ube2b	Ubiquitin-conjugating enzyme E2 B [Source:UniProtKB/Swiss-Prot;Acc:P63149]	A
ENSRNOG00000005067	-13.159	1.01753	3.87e-06	1.84e-05	2.02445	Zfp36l2	butyrate response factor 2 [Source:RefSeq peptide;Acc:NP_001031703]	E
ENSRNOG00000005070	-15.0567	-1.40457	5.38e-10	3.65e-09	-2.64739	Spopl	speckle-type POZ protein-like A [Source:RefSeq peptide;Acc:NP_001127919]	A
ENSRNOG00000005071	-20.7676	1.72368	0.000196436	0.000755184	3.30279	RL7A_RAT	60S ribosomal protein L7a [Source:UniProtKB/Swiss-Prot;Acc:P62425]	E
ENSRNOG00000005074	-13.9824	-0.528163	0.0163328	0.0459072	-1.44209	Arl6ip6	ADP-ribosylation factor-like protein 6-interacting protein 6 [Source:UniProtKB/Swiss-Prot;Acc:Q68FV2]	A
ENSRNOG00000005076	-15.2973	1.70164	1.53e-13	1.34e-12	3.25271	Bcorl1	BCL-6 corepressor-like protein 1 [Source:RefSeq peptide;Acc:NP_001178516]	E
ENSRNOG00000005082	-15.2105	-0.901665	5.95e-05	0.000244731	-1.86822	Irf6	interferon regulatory factor 6 [Source:RefSeq peptide;Acc:NP_001102329]	A
ENSRNOG00000005093	-20.9447	3.60502	5.71e-13	4.81e-12	12.168	Lgr6	Uncharacterized protein [Source:UniProtKB/TrEMBL;Acc:D3ZJU9]	E
ENSRNOG00000005094	-20.9685	1.80806	0.000197398	0.000758682	3.50171	C1qtnf7	complement C1q tumor necrosis factor-related protein 7 [Source:RefSeq peptide;Acc:NP_001100691]	E
ENSRNOG00000005096	-14.2263	1.4096	3.34e-10	2.31e-09	2.65663	Bzw2	Basic leucine zipper and W2 domain-containing protein 2 [Source:UniProtKB/Swiss-Prot;Acc:Q9WTT7]	E
ENSRNOG00000005097	-16.4991	0.723347	0.00210657	0.00691916	1.65101	CDKL3_RAT	Cyclin-dependent kinase-like 3 [Source:UniProtKB/Swiss-Prot;Acc:Q9JM01]	E
ENSRNOG00000005099	-15.9971	0.968308	2.77e-05	0.000119046	1.95654	D4A6J4_RAT	Uncharacterized protein [Source:UniProtKB/TrEMBL;Acc:D3ZNC7]	E
ENSRNOG00000005101	-12.693	-1.81877	4.93e-16	5.02e-15	-3.5278	D3ZVL1_RAT	Uncharacterized protein [Source:UniProtKB/TrEMBL;Acc:D3ZHI1]	A
ENSRNOG00000005102	-15.0895	-0.629676	0.00481025	0.0148219	-1.54722	Ccdc53	WASH complex subunit CCDC53 [Source:RefSeq peptide;Acc:NP_001100246]	A
ENSRNOG00000005106	-13.9259	-1.06721	1.43e-06	7.08e-06	-2.09537	D3ZJV0_RAT	Uncharacterized protein [Source:UniProtKB/TrEMBL;Acc:D3ZJV0]	A
ENSRNOG00000005108	-15.2714	-1.4155	4.53e-10	3.09e-09	-2.66752	Wfs1	wolframin [Source:RefSeq peptide;Acc:NP_114011]	A
ENSRNOG00000005109	-22.0356	6.59579	1.24e-22	1.79e-21	96.723	Rprm	Protein reprimo [Source:UniProtKB/Swiss-Prot;Acc:Q5BJN9]	E
ENSRNOG00000005114	-20.9891	2.68912	4.85e-08	2.77e-07	6.44922	Tmem74	Uncharacterized protein [Source:UniProtKB/TrEMBL;Acc:D3ZR33]	E
ENSRNOG00000005115	-19.3263	6.3979	1.24e-59	8.44e-58	84.3256	Asf1b	ASF1 anti-silencing function 1 homolog B [Source:RefSeq peptide;Acc:NP_001100630]	E
ENSRNOG00000005118	-18.1303	2.20031	3.61e-15	3.52e-14	4.59579	Fam110a	None	E
ENSRNOG00000005123	-12.6174	-1.37947	4.59e-10	3.14e-09	-2.60173	Ttc35	Tetratricopeptide repeat protein 35 [Source:UniProtKB/Swiss-Prot;Acc:B0BNG0]	A
ENSRNOG00000005124	-14.7744	0.558801	0.012016	0.0345918	1.47304	D3ZNS6_RAT	pleckstrin homology domain-containing family H member 2 [Source:RefSeq peptide;Acc:NP_001178699]	E
ENSRNOG00000005126	-13.7261	-1.36189	9.26e-10	6.17e-09	-2.57021	Pqlc3	PQ-loop repeat-containing protein 3 [Source:RefSeq peptide;Acc:NP_001030124]	A
ENSRNOG00000005130	-11.3034	-1.09577	5.81e-07	3e-06	-2.13727	Ogdh	2-oxoglutarate dehydrogenase, mitochondrial [Source:UniProtKB/Swiss-Prot;Acc:Q5XI78]	A
ENSRNOG00000005132	-19.8298	1.29457	0.000283409	0.00106347	2.45304	RGD1304644	Riboflavin transporter 2 [Source:UniProtKB/Swiss-Prot;Acc:Q4FZU9]	E
ENSRNOG00000005136	-19.3307	4.38772	9.86e-34	2.37e-32	20.9332	Ldlrad3		E
ENSRNOG00000005138	-13.6367	-1.24173	2.13e-08	1.26e-07	-2.36482	Pip4k2c	Phosphatidylinositol-5-phosphate 4-kinase type-2 gamma [Source:UniProtKB/Swiss-Prot;Acc:O88370]	A
ENSRNOG00000005140	-22.2386	4.18853	3.46e-09	2.19e-08	18.2337	Prmt8		E
ENSRNOG00000005141	-14.9601	-0.699125	0.00172873	0.00575118	-1.62352	Hus1	checkpoint protein HUS1 [Source:RefSeq peptide;Acc:NP_001102562]	A
ENSRNOG00000005144	-14.5612	-1.54106	7.78e-12	6.08e-11	-2.91009	Tmem18	Transmembrane protein 18 [Source:UniProtKB/Swiss-Prot;Acc:Q6DGF8]	A
ENSRNOG00000005148	-34.7305	30.5711	1.17e-16	1.25e-15	1.5952e+09	Scrt2	transcriptional repressor scratch 2 [Source:RefSeq peptide;Acc:NP_001178834]	E
ENSRNOG00000005149	-12.589	-1.22644	2.67e-08	1.56e-07	-2.33989	Sacm1l	Phosphatidylinositide phosphatase SAC1 [Source:UniProtKB/Swiss-Prot;Acc:Q9ES21]	A
ENSRNOG00000005153	-17.2677	2.68434	1.36e-24	2.18e-23	6.42788	D4A8N6_RAT	RCG27644Uncharacterized protein [Source:UniProtKB/TrEMBL;Acc:D4A8N6]	E
ENSRNOG00000005158	-18.1456	-2.54449	1.2e-20	1.58e-19	-5.83401	Slc24a5	solute carrier family 24, member 5 [Source:RefSeq peptide;Acc:NP_001101239]	A
ENSRNOG00000005159	-19.7698	-4.7317	3.99e-38	1.13e-36	-26.5695	RGD1308133		A
ENSRNOG00000005166	-32.9877	34.0568	1.95e-71	2.05e-69	1.78693e+10	Nhlh1	helix-loop-helix protein 1 [Source:RefSeq peptide;Acc:NP_001099440]	E
ENSRNOG00000005167	-14.3168	-1.2981	6.17e-09	3.83e-08	-2.45905	Surf2	surfeit 2 [Source:RefSeq peptide;Acc:NP_001029038]	A
ENSRNOG00000005175	-15.3701	-2.01058	3.69e-18	4.26e-17	-4.02944	Sgpp1	Sphingosine-1-phosphate phosphatase 1 [Source:UniProtKB/Swiss-Prot;Acc:Q99P55]	A
ENSRNOG00000005176	-16.3882	-4.0047	7.42e-54	3.84e-52	-16.0523	Map7d2	Uncharacterized protein [Source:UniProtKB/TrEMBL;Acc:D3ZWV6]	A
ENSRNOG00000005178	-22.0901	-4.91206	1.22e-14	1.15e-13	-30.1077	LOC689081	similar to cystatin E2 (LOC689081), mRNA [Source:RefSeq DNA;Acc:NM_001109522]	A
ENSRNOG00000005184	-16.2814	-0.856731	0.000216909	0.000828273	-1.81093	Nop10	H/ACA ribonucleoprotein complex subunit 3 [Source:RefSeq peptide;Acc:NP_001119572]	A
ENSRNOG00000005188	-17.5085	4.35779	4.96e-51	2.3e-49	20.5034	Tspan11	Tetraspanin-11 [Source:UniProtKB/Swiss-Prot;Acc:Q568Y5]	E
ENSRNOG00000005190	-14.7582	-3.03244	4.22e-37	1.14e-35	-8.18194	Nipal2	NIPA-like protein 2 [Source:RefSeq peptide;Acc:NP_001124031]	A
ENSRNOG00000005191	-14.7855	1.6486	4.66e-13	3.95e-12	3.1353	Trim44	Tripartite motif-containing protein 44 [Source:UniProtKB/Swiss-Prot;Acc:Q6QA27]	E
ENSRNOG00000005193	-13.871	1.47039	5.16e-11	3.79e-10	2.77096	Pfas	phosphoribosylformylglycinamidine synthase [Source:RefSeq peptide;Acc:NP_001099261]	E
ENSRNOG00000005195	-10.0058	-6.41389	3.63e-121	2.67e-118	-85.2653	Cst3	Cystatin-C [Source:UniProtKB/Swiss-Prot;Acc:P14841]	A
ENSRNOG00000005196	-14.1341	-0.559157	0.0111602	0.0322857	-1.47341	Slc12a6	solute carrier family 12 member 6 [Source:RefSeq peptide;Acc:NP_001103100]	A
ENSRNOG00000005206	-19.9902	4.03748	2.19e-23	3.27e-22	16.4211	Kcnq3	Potassium voltage-gated channel subfamily KQT member 3 [Source:UniProtKB/Swiss-Prot;Acc:O88944]	E
ENSRNOG00000005209	-15.718	1.33033	8.26e-09	5.07e-08	2.5146	Spred1	sprouty-related, EVH1 domain-containing protein 1 [Source:RefSeq peptide;Acc:NP_001040554]	E
ENSRNOG00000005210	-14.0839	-1.94914	8.62e-18	9.79e-17	-3.86145	Gnai1	guanine nucleotide binding protein (G protein), alpha inhibiting 1 (Gnai1), mRNA [Source:RefSeq DNA;Acc:NM_013145]	A
ENSRNOG00000005218	-12.5156	0.576321	0.00825186	0.0244922	1.49104	Sf3a1	splicing factor 3A subunit 1 [Source:RefSeq peptide;Acc:NP_001100705]	E
ENSRNOG00000005220	-17.54	1.02527	5.75e-05	0.000237331	2.03534	Syne2	Uncharacterized protein [Source:UniProtKB/TrEMBL;Acc:D3ZG70]	E
ENSRNOG00000005223	-18.2559	-4.34111	1.35e-48	5.71e-47	-20.2677	Hnmt	Histamine N-methyltransferase [Source:UniProtKB/Swiss-Prot;Acc:Q01984]	A
ENSRNOG00000005227	-17.9292	2.68004	5.54e-22	7.8e-21	6.40872	Tcfap4	transcription factor AP-4 [Source:RefSeq peptide;Acc:NP_001101737]	E
ENSRNOG00000005229	-18.5771	1.24187	1.6e-05	7.07e-05	2.36505	Sec16b	Protein transport protein Sec16B [Source:UniProtKB/Swiss-Prot;Acc:Q75N33]	E
ENSRNOG00000005233	-15.5639	0.739562	0.0011046	0.0038018	1.66967	Lrrc6	leucine rich repeat containing 6 [Source:RefSeq peptide;Acc:NP_001020830]	E
ENSRNOG00000005246	-19.7663	7.1284	3.48e-61	2.46e-59	139.914	Tcfap2c	transcription factor AP-2 gamma [Source:RefSeq peptide;Acc:NP_958823]	E
ENSRNOG00000005247	-12.717	-0.531881	0.0147474	0.0417937	-1.44581	Surf1	Surfeit locus protein 1 [Source:UniProtKB/Swiss-Prot;Acc:Q9QXU2]	A
ENSRNOG00000005248	-16.9639	2.35916	1.17e-20	1.55e-19	5.13071	Slc1a4	neutral amino acid transporter A [Source:RefSeq peptide;Acc:NP_942058]	E
ENSRNOG00000005250	-14.4865	4.76242	3.02e-75	3.97e-73	27.1413	Abcg5	ATP-binding cassette sub-family G member 5 [Source:UniProtKB/Swiss-Prot;Acc:Q99PE7]	E
ENSRNOG00000005261	-12.2544	-2.0501	1.01e-19	1.27e-18	-4.14134	Fbxl5	F-box/LRR-repeat protein 5 [Source:RefSeq peptide;Acc:NP_001100692]	A
ENSRNOG00000005264	-14.1159	-0.77635	0.000437858	0.00159906	-1.71279	Sav1	Protein salvador homolog 1 [Source:UniProtKB/Swiss-Prot;Acc:A4V8B4]	A
ENSRNOG00000005270	-18.7219	-2.7519	1.11e-20	1.47e-19	-6.73606	LOC100362033	Synaptonemal complex protein 3 [Source:UniProtKB/Swiss-Prot;Acc:Q63520]	A
ENSRNOG00000005271	-16.3992	2.19138	2.29e-19	2.83e-18	4.56744	Rapgef5	rap guanine nucleotide exchange factor 5 [Source:RefSeq peptide;Acc:NP_001041380]	E
ENSRNOG00000005272	-14.6004	-0.576525	0.00928313	0.0271836	-1.49125	Tspan12	Tetraspanin-12 [Source:UniProtKB/Swiss-Prot;Acc:Q569A2]	A
ENSRNOG00000005274	-15.6445	1.21446	1.23e-07	6.79e-07	2.32054	Vrk1	serine/threonine-protein kinase VRK1 [Source:RefSeq peptide;Acc:NP_001012194]	E
ENSRNOG00000005275	-19.2793	5.18437	6.42e-44	2.27e-42	36.3622	Shmt1	serine hydroxymethyltransferase, cytosolic [Source:RefSeq peptide;Acc:NP_001041307]	E
ENSRNOG00000005277	-35.4321	29.1678	1.23e-07	6.81e-07	6.03103e+08	Ptprv	Receptor-type tyrosine-protein phosphatase V [Source:UniProtKB/Swiss-Prot;Acc:Q64612]	E
ENSRNOG00000005278	-19.9072	3.69367	1.27e-21	1.75e-20	12.9391	Trhde	Thyrotropin-releasing hormone-degrading ectoenzyme [Source:UniProtKB/Swiss-Prot;Acc:Q10836]	E
ENSRNOG00000005279	-14.5613	-0.673365	0.00235777	0.00769196	-1.59479	RGD1311578	Protein midA homolog, mitochondrial [Source:UniProtKB/Swiss-Prot;Acc:Q5XI79]	A
ENSRNOG00000005284	-18.387	1.00909	0.000275283	0.00103442	2.01264	Itpka	Inositol-trisphosphate 3-kinase A [Source:UniProtKB/Swiss-Prot;Acc:P17105]	E
ENSRNOG00000005285	-13.1284	-2.34346	1.22e-24	1.96e-23	-5.0752	Fbxo33	F-box only protein 33 [Source:RefSeq peptide;Acc:NP_001101493]	A
ENSRNOG00000005286	-16.8443	-5.21276	9.06e-77	1.28e-74	-37.0849	B1H259_RAT	cochlin [Source:RefSeq peptide;Acc:NP_001102180]	A
ENSRNOG00000005287	-17.6806	-1.88057	2.2e-13	1.9e-12	-3.68221	D3ZD24_RAT	similar to RIKEN cDNA 4831426I19 (RGD1304563), mRNA [Source:RefSeq DNA;Acc:NM_001106762]	A
ENSRNOG00000005289	-13.4296	0.908139	3.74e-05	0.000157791	1.87662	Prkd3	serine/threonine-protein kinase D3 [Source:RefSeq peptide;Acc:NP_001019434]	E
ENSRNOG00000005291	-16.263	3.86544	1.01e-49	4.54e-48	14.5752	Slc38a1	Sodium-coupled neutral amino acid transporter 1 [Source:UniProtKB/Swiss-Prot;Acc:Q9JM15]	E
ENSRNOG00000005292	-12.3353	-1.10232	5.26e-07	2.73e-06	-2.147	Trip11	Fibulin-5 [Source:UniProtKB/Swiss-Prot;Acc:Q9WVH8]	A
ENSRNOG00000005297	-17.0948	-2.8519	2.64e-29	5.19e-28	-7.21953	LOC100362008		A
ENSRNOG00000005298	-15.6065	1.86195	1.58e-15	1.56e-14	3.63499	ZN513_RAT	Zinc finger protein 513 [Source:UniProtKB/Swiss-Prot;Acc:Q5FWU5]	E
ENSRNOG00000005305	-15.4168	-1.18311	1.81e-07	9.83e-07	-2.27065	LOC100365746	None	A
ENSRNOG00000005306	-16.3949	-0.582795	0.0122495	0.0352193	-1.49775	Lmbr1	limb region 1 homolog [Source:RefSeq peptide;Acc:NP_001178787]	A
ENSRNOG00000005307	-12.4883	-5.93311	1.02e-107	4.92e-105	-61.1004	Slc4a10	Sodium-driven chloride bicarbonate exchanger [Source:UniProtKB/Swiss-Prot;Acc:Q80ZA5]	A
ENSRNOG00000005308	-12.7312	-1.3056	3.49e-09	2.21e-08	-2.47187	Tmx2	Thioredoxin-related transmembrane protein 2 [Source:UniProtKB/Swiss-Prot;Acc:Q5XIK2]	A
ENSRNOG00000005309	-17.4617	2.69461	5.09e-24	7.91e-23	6.47377	Scn8a	Sodium channel protein type 8 subunit alpha [Source:UniProtKB/Swiss-Prot;Acc:O88420]	E
ENSRNOG00000005316	-16.0069	-0.990061	1.59e-05	7.06e-05	-1.98627	None		A
ENSRNOG00000005318	-14.9835	0.582002	0.00915816	0.0268603	1.49693	Ahsa2	activator of 90 kDa heat shock protein ATPase homolog 2 [Source:RefSeq peptide;Acc:NP_001100711]	E
ENSRNOG00000005326	-16.4125	2.86349	3.01e-30	6.13e-29	7.27774	Cnrip1	CB1 cannabinoid receptor-interacting protein 1 [Source:UniProtKB/Swiss-Prot;Acc:Q5M7A7]	E
ENSRNOG00000005330	-13.7617	0.635257	0.00386097	0.0121587	1.55321	Crebbp	CREB-binding protein [Source:RefSeq peptide;Acc:NP_596872]	E
ENSRNOG00000005331	-12.7449	-0.604268	0.00564378	0.0172318	-1.52021	Vapb	Vesicle-associated membrane protein-associated protein B [Source:UniProtKB/Swiss-Prot;Acc:Q9Z269]	A
ENSRNOG00000005332	-17.3803	1.90417	1.09e-13	9.67e-13	3.74293	Csdc2	Cold shock domain-containing protein C2 [Source:UniProtKB/Swiss-Prot;Acc:Q63430]	E
ENSRNOG00000005333	-11.5752	-0.738873	0.000701759	0.00248498	-1.66887	Azin1	Antizyme inhibitor 1 [Source:UniProtKB/Swiss-Prot;Acc:Q63764]	A
ENSRNOG00000005335	-20.1488	4.38017	7.43e-26	1.27e-24	20.8239	Galnt13	polypeptide N-acetylgalactosaminyltransferase 13 [Source:RefSeq peptide;Acc:NP_954537]	E
ENSRNOG00000005342	-19.4875	1.77811	1.72e-07	9.39e-07	3.42976	Rassf5	Ras association domain-containing protein 5 [Source:UniProtKB/Swiss-Prot;Acc:O35141]	E
ENSRNOG00000005343	-35.1229	29.7863	3.52e-11	2.62e-10	9.25885e+08	Esr2	Estrogen receptor beta [Source:UniProtKB/Swiss-Prot;Acc:Q62986]	E
ENSRNOG00000005344	-14.7977	0.538621	0.0154719	0.0436621	1.45258	Nol10	Nucleolar protein 10 [Source:UniProtKB/Swiss-Prot;Acc:Q66H99]	E
ENSRNOG00000005346	-14.3603	-0.832964	0.000169713	0.000658458	-1.78134	Tmem128	transmembrane protein 128 [Source:RefSeq peptide;Acc:NP_001101832]	A
ENSRNOG00000005347	-16.6557	2.69941	9.17e-27	1.63e-25	6.49534	Fjx1	four-jointed box protein 1 [Source:RefSeq peptide;Acc:NP_001102425]	E
ENSRNOG00000005348	-15.822	-4.48527	1.74e-66	1.49e-64	-22.3976	Pamr1	inactive serine protease PAMR1 [Source:RefSeq peptide;Acc:NP_001101225]	A
ENSRNOG00000005350	-16.1453	1.00407	1.59e-05	7.04e-05	2.00564	Pwp1	periodic tryptophan protein 1 homolog [Source:RefSeq peptide;Acc:NP_001178806]	E
ENSRNOG00000005352	-17.5681	1.93378	1.31e-13	1.15e-12	3.82056	Elf4	ETS-related transcription factor Elf-4 [Source:RefSeq peptide;Acc:NP_001178664]	E
ENSRNOG00000005357	-12.5732	0.923	2.57e-05	0.000110653	1.89605	RGD1563106	similar to novel protein (RGD1563106), mRNA [Source:RefSeq DNA;Acc:NM_001107010]	E
ENSRNOG00000005358	-15.0895	-1.54715	9.51e-12	7.39e-11	-2.9224	Pmm1	phosphomannomutase 1 [Source:RefSeq peptide;Acc:NP_001008324]	A
ENSRNOG00000005359	-19.6881	3.29685	3.47e-19	4.23e-18	9.82769	Csrnp3	Similar to TGF-beta induced apotosis protein 2 (Predicted)Uncharacterized protein [Source:UniProtKB/TrEMBL;Acc:D4AE74]	E
ENSRNOG00000005360	-14.5326	-1.10213	7.66e-07	3.91e-06	-2.14672	Dhrs7b	Dehydrogenase/reductase SDR family member 7B [Source:UniProtKB/Swiss-Prot;Acc:Q5RJY4]	A
ENSRNOG00000005362	-14.1151	-1.1825	1.04e-07	5.75e-07	-2.26969	Rab3ip	Rab-3A-interacting protein [Source:UniProtKB/Swiss-Prot;Acc:Q62739]	A
ENSRNOG00000005367	-36.3455	27.3411	0.00473594	0.0146113	1.70011e+08	Slc12a1	Solute carrier family 12 member 1 [Source:UniProtKB/Swiss-Prot;Acc:P55016]	E
ENSRNOG00000005369	-18.9149	3.6904	1.49e-29	2.96e-28	12.9099	Kcnj3	G protein-activated inward rectifier potassium channel 1 [Source:UniProtKB/Swiss-Prot;Acc:P63251]	E
ENSRNOG00000005370	-35.0229	29.9863	1.36e-11	1.04e-10	1.06357e+09	S1pr4	sphingosine 1-phosphate receptor 4 [Source:RefSeq peptide;Acc:NP_001101545]	E
ENSRNOG00000005373	-35.7215	28.5891	2.85e-05	0.000122211	4.03823e+08	Sbp	Prostatic spermine-binding protein [Source:UniProtKB/Swiss-Prot;Acc:P08723]	E
ENSRNOG00000005376	-15.4221	1.78663	1.34e-14	1.25e-13	3.45008	Mad2l1	mitotic spindle assembly checkpoint protein MAD2A [Source:RefSeq peptide;Acc:NP_001100064]	E
ENSRNOG00000005382	-16.8444	-1.27925	8.55e-08	4.79e-07	-2.42713	RGD1311993	Uncharacterized protein [Source:UniProtKB/TrEMBL;Acc:D4A9I8]	A
ENSRNOG00000005386	-14.6866	2.53741	3.09e-27	5.59e-26	5.80547	Kitlg	Kit ligand [Source:UniProtKB/Swiss-Prot;Acc:P21581]	E
ENSRNOG00000005387	-12.9593	0.915036	3.1e-05	0.000132001	1.88562	Rbm3	Putative RNA-binding protein 3 [Source:UniProtKB/Swiss-Prot;Acc:Q925G0]	E
ENSRNOG00000005388	-13.0872	-1.80644	8.42e-16	8.47e-15	-3.49779	D4ACL6_RAT	ras association domain-containing protein 3 [Source:RefSeq peptide;Acc:NP_001102217]	A
ENSRNOG00000005390	-15.4142	1.44321	3.12e-10	2.16e-09	2.71926	Nup210	Nuclear pore membrane glycoprotein 210 [Source:UniProtKB/Swiss-Prot;Acc:P11654]	E
ENSRNOG00000005391	-15.9713	2.02673	1.53e-17	1.72e-16	4.07481	Prex2	phosphatidylinositol 3,4,5-trisphosphate-dependent Rac exchanger 2 protein [Source:RefSeq peptide;Acc:NP_001101369]	E
ENSRNOG00000005392	-18.0925	4.87882	1.02e-54	5.51e-53	29.4218	Ngfr	Tumor necrosis factor receptor superfamily member 16 [Source:UniProtKB/Swiss-Prot;Acc:P07174]	E
ENSRNOG00000005393	-16.9256	0.8427	0.000468598	0.00170456	1.7934	Sertad2	SERTA domain-containing protein 2 [Source:RefSeq peptide;Acc:NP_001020074]	E
ENSRNOG00000005397	-12.4855	-0.722333	0.000941911	0.00327012	-1.64985	Maea	Macrophage erythroblast attacher [Source:UniProtKB/Swiss-Prot;Acc:Q5RKJ1]	A
ENSRNOG00000005404	-18.0807	0.767481	0.00318514	0.0101508	1.70229	Rasgrp1	RAS guanyl-releasing protein 1 [Source:UniProtKB/Swiss-Prot;Acc:Q9R1K8]	E
ENSRNOG00000005408	-17.6263	1.77813	9.95e-12	7.72e-11	3.42981	Gtlf3b	transcript expressed during hematopoiesis 2 [Source:RefSeq peptide;Acc:NP_001164012]	E
ENSRNOG00000005410	-16.9166	1.59668	7.82e-11	5.68e-10	3.02447	Cdca7l	Cell division cycle-associated 7-like protein [Source:UniProtKB/Swiss-Prot;Acc:Q4G059]	E
ENSRNOG00000005411	-13.3047	-1.58341	1.31e-12	1.07e-11	-2.99677	Aftph	Uncharacterized protein [Source:UniProtKB/TrEMBL;Acc:D3ZQQ1]	A
ENSRNOG00000005413	-14.1088	-1.33889	1.93e-09	1.26e-08	-2.52956	Creb3l1	Cyclic AMP-responsive element-binding protein 3-like protein 1Processed cyclic AMP-responsive element-binding protein 3-like protein 1 [Source:UniProtKB/Swiss-Prot;Acc:Q66HA2]	A
ENSRNOG00000005420	-18.5106	6.47292	1.08e-73	1.3e-71	88.8263	Abcg8	ATP-binding cassette sub-family G member 8 [Source:RefSeq peptide;Acc:NP_569098]	E
ENSRNOG00000005429	-20.4335	5.1496	2.16e-29	4.25e-28	35.4965	Foxp2		E
ENSRNOG00000005434	-10.332	-0.580859	0.00750207	0.0224248	-1.49574	Sptbn1	spectrin beta chain, brain 1 [Source:RefSeq peptide;Acc:NP_001013148]	A
ENSRNOG00000005437	-15.3833	-2.46917	1.02e-25	1.73e-24	-5.53724	Hrsp12	Ribonuclease UK114 [Source:UniProtKB/Swiss-Prot;Acc:P52759]	A
ENSRNOG00000005442	-13.9124	2.12342	1.6e-20	2.1e-19	4.35727	Tspan9	tetraspanin-9 [Source:RefSeq peptide;Acc:NP_001101360]	E
ENSRNOG00000005447	-16.8203	-2.54433	8.88e-25	1.43e-23	-5.83337	RGD1311564	LOC360590 (RGD1311564), mRNA [Source:RefSeq DNA;Acc:NM_001108286]	A
ENSRNOG00000005450	-18.7735	2.93197	1.06e-20	1.4e-19	7.63151	Lsm11	U7 snRNA-associated Sm-like protein LSm11 [Source:RefSeq peptide;Acc:NP_001166855]	E
ENSRNOG00000005452	-18.0545	-2.23389	7.49e-17	8.05e-16	-4.70399	Ppp2r2c	protein phosphatase 2 (formerly 2A), regulatory subunit B (PR 52), gamma isoform Gene [Source:MGI Symbol;Acc:MGI:2442660]	A
ENSRNOG00000005457	-36.1747	-27.6827	0.00248165	0.00803652	-2.15433e+08	RGD1306991	LAMP family protein C20orf103 homolog [Source:UniProtKB/Swiss-Prot;Acc:Q5PPI4]	A
ENSRNOG00000005464	-13.3973	-2.09296	2.93e-20	3.79e-19	-4.26621	Hspc159	galectin-related protein [Source:RefSeq peptide;Acc:NP_001128202]	A
ENSRNOG00000005465	-36.4894	27.0533	0.0175039	0.0485142	1.39274e+08	Kcnmb1	Calcium-activated potassium channel subunit beta-1 [Source:UniProtKB/Swiss-Prot;Acc:P97678]	E
ENSRNOG00000005474	-36.3802	-27.2717	0.0175039	0.0485142	-1.62028e+08	None	None	A
ENSRNOG00000005478	-12.3531	-1.83431	2.67e-16	2.76e-15	-3.56602	Fkbp9	Peptidyl-prolyl cis-trans isomerase FKBP9 [Source:UniProtKB/Swiss-Prot;Acc:Q66H94]	A
ENSRNOG00000005480	-13.8587	1.52897	9.03e-12	7.02e-11	2.88581	Csda	DNA-binding protein A [Source:UniProtKB/Swiss-Prot;Acc:Q62764]	E
ENSRNOG00000005483	-14.5924	0.852322	0.000129767	0.000512104	1.8054	Rpap1	RNA polymerase II-associated protein 1 [Source:UniProtKB/Swiss-Prot;Acc:Q3T1I9]	E
ENSRNOG00000005487	-14.2398	-1.50398	2.03e-11	1.54e-10	-2.83623	Chpt1	Cholinephosphotransferase 1 [Source:UniProtKB/Swiss-Prot;Acc:Q66H21]	A
ENSRNOG00000005489	-15.1947	0.611131	0.00650855	0.0196483	1.52746	Dpp3	Dipeptidyl peptidase 3 [Source:UniProtKB/Swiss-Prot;Acc:O55096]	E
ENSRNOG00000005491	-19.4565	-5.95603	7.22e-60	4.98e-58	-62.0788	Best3	bestrophin-3 [Source:RefSeq peptide;Acc:NP_001178712]	A
ENSRNOG00000005492	-14.6361	-1.15191	2.52e-07	1.35e-06	-2.22208	Hpcal1	Hippocalcin-like protein 1 [Source:UniProtKB/Swiss-Prot;Acc:P62749]	A
ENSRNOG00000005502	-13.2617	-0.7376	0.000766561	0.00269788	-1.6674	Ankib1	ankyrin repeat and IBR domain-containing protein 1 [Source:RefSeq peptide;Acc:NP_001128253]	A
ENSRNOG00000005505	-12.9816	0.7756	0.000403358	0.00148022	1.7119	Wbp11	WW domain-binding protein 11 [Source:UniProtKB/Swiss-Prot;Acc:Q5PQQ2]	E
ENSRNOG00000005506	-14.6738	-1.51161	2.02e-11	1.53e-10	-2.85128	Arhgef5		A
ENSRNOG00000005509	-17.9633	-0.799015	0.00223446	0.00731398	-1.73991	Pak7	serine/threonine-protein kinase PAK 7 [Source:RefSeq peptide;Acc:NP_001101251]	A
ENSRNOG00000005512	-11.2252	-1.98023	1.2e-18	1.43e-17	-3.94556	Ndufa4	NADH dehydrogenase [Source:RefSeq peptide;Acc:NP_001121156]	A
ENSRNOG00000005515	-14.2693	-0.78429	0.000387409	0.00142417	-1.72224	Rhbdl3	rhomboid-related protein 3 [Source:RefSeq peptide;Acc:NP_001099289]	A
ENSRNOG00000005519	-19.4908	1.04172	0.00211622	0.00694622	2.05868	Grm3	Metabotropic glutamate receptor 3 [Source:UniProtKB/Swiss-Prot;Acc:P31422]	E
ENSRNOG00000005528	-14.4969	-1.55832	4.5e-12	3.57e-11	-2.94511	Tbk1	serine/threonine-protein kinase TBK1 [Source:RefSeq peptide;Acc:NP_001100256]	A
ENSRNOG00000005530	-16.6676	-1.86199	8.87e-15	8.4e-14	-3.6351	D4A268_RAT	Uncharacterized protein [Source:UniProtKB/TrEMBL;Acc:D4A268]	A
ENSRNOG00000005531	-13.2722	-1.45354	6.31e-11	4.61e-10	-2.73879	Tyro3	Tyrosine-protein kinase receptor TYRO3 [Source:UniProtKB/Swiss-Prot;Acc:P55146]	A
ENSRNOG00000005539	-16.9311	1.10812	5.13e-06	2.41e-05	2.15564	Thg1l	Probable tRNA(His) guanylyltransferase [Source:UniProtKB/Swiss-Prot;Acc:Q5M965]	E
ENSRNOG00000005540	-15.5826	2.01161	1.01e-17	1.15e-16	4.03232	Nin	ninein [Source:RefSeq peptide;Acc:NP_001100207]	E
ENSRNOG00000005541	-15.774	-1.01085	9.15e-06	4.17e-05	-2.0151	Timm17al1	None	A
ENSRNOG00000005542	-20.5225	4.97236	1.05e-26	1.86e-25	31.3927	Apob	Apolipoprotein B-100Apolipoprotein B-48 [Source:UniProtKB/Swiss-Prot;Acc:Q7TMA5]	E
ENSRNOG00000005543	-20.9016	6.85946	3.46e-39	1.02e-37	116.119	D4A2S4_RAT	myosin-binding protein C, slow-type [Source:RefSeq peptide;Acc:NP_001094228]	E
ENSRNOG00000005550	-20.6739	-1.29622	0.00358644	0.0113524	-2.45585	LOC100360181	Leucine-rich repeat and fibronectin type-III domain-containing protein 5 [Source:UniProtKB/Swiss-Prot;Acc:D4A1J9]	A
ENSRNOG00000005551	-12.4035	-0.897442	4.15e-05	0.000174254	-1.86276	Derl1	derlin-1 [Source:RefSeq peptide;Acc:NP_001014224]	A
ENSRNOG00000005556	-15.8531	1.00179	1.3e-05	5.8e-05	2.00249	Snrpf	small nuclear ribonucleoprotein F [Source:RefSeq peptide;Acc:NP_001119563]	E
ENSRNOG00000005559	-36.0876	-27.8569	0.00130666	0.00443409	-2.43092e+08	None	None	A
ENSRNOG00000005564	-15.1304	0.996707	1e-05	4.54e-05	1.99544	Ubn2	ubinuclein-2 [Source:RefSeq peptide;Acc:NP_001128025]	E
ENSRNOG00000005565	-22.2126	2.24442	0.00135885	0.00459904	4.73847	Traf3ip3	TRAF3-interacting JNK-activating modulator [Source:RefSeq peptide;Acc:NP_001014154]	E
ENSRNOG00000005568	-12.6555	-0.96189	1.16e-05	5.23e-05	-1.94786	LOC100361845		A
ENSRNOG00000005569	-18.2022	1.06624	9.42e-05	0.000378747	2.09397	Phospho1	phosphoethanolamine/phosphocholine phosphatase [Source:RefSeq peptide;Acc:NP_001099303]	E
ENSRNOG00000005572	-19.7891	1.37661	0.000155948	0.000608417	2.59658	RGD1306782	Uncharacterized protein [Source:UniProtKB/TrEMBL;Acc:D4AAT2]	E
ENSRNOG00000005573	-16.1732	-4.24384	9.01e-60	6.21e-58	-18.9463	RGD1565947	similar to netrin 4 (RGD1565947), mRNA [Source:RefSeq DNA;Acc:NM_001106780]	A
ENSRNOG00000005574	-22.1221	3.25614	1.82e-06	8.93e-06	9.55425	D4AAT1_RAT	A disintegrin-like and metallopeptidase (Reprolysin type) with thrombospondin type 1 motif, 8 (Predicted)Uncharacterized protein [Source:UniProtKB/TrEMBL;Acc:D3ZNJ3]	E
ENSRNOG00000005575	-18.4235	1.86498	8.23e-11	5.96e-10	3.64264	Abi3	ABI gene family member 3 [Source:RefSeq peptide;Acc:NP_001013136]	E
ENSRNOG00000005577	-14.5459	-1.36616	1.1e-09	7.27e-09	-2.57783	Pppde2	PPPDE peptidase domain-containing protein 2 [Source:UniProtKB/Swiss-Prot;Acc:Q4KM30]	A
ENSRNOG00000005580	-16.7538	-3.77761	9.4e-48	3.84e-46	-13.7143	Itgb4	Integrin beta-4 [Source:UniProtKB/Swiss-Prot;Acc:Q64632]	A
ENSRNOG00000005585	-13.1457	-0.806096	0.000236904	0.000899496	-1.74847	Strn3	Striatin-3 [Source:UniProtKB/Swiss-Prot;Acc:P58405]	A
ENSRNOG00000005587	-12.8565	-0.559345	0.0104198	0.0302894	-1.4736	Suclg1	Succinyl-CoA ligase [GDP-forming] subunit alpha, mitochondrial [Source:UniProtKB/Swiss-Prot;Acc:P13086]	A
ENSRNOG00000005589	-16.391	-2.54564	1.15e-25	1.94e-24	-5.83868	RGD1565002	Uncharacterized protein [Source:UniProtKB/TrEMBL;Acc:D4A0T8]	A
ENSRNOG00000005592	-20.9162	2.49606	2.24e-07	1.21e-06	5.64142	Fam5b	Protein FAM5B [Source:UniProtKB/Swiss-Prot;Acc:Q8K1M8]	E
ENSRNOG00000005596	-15.0801	-1.34629	2.59e-09	1.66e-08	-2.54257	Gdpd1	Glycerophosphodiester phosphodiesterase domain-containing protein 1 [Source:UniProtKB/Swiss-Prot;Acc:Q0VGK4]	A
ENSRNOG00000005600	-15.7505	3.42482	1.53e-42	5.15e-41	10.7392	Nr4a2	Nuclear receptor subfamily 4 group A member 2 [Source:UniProtKB/Swiss-Prot;Acc:Q07917]	E
ENSRNOG00000005601	-14.3759	-1.24745	2.3e-08	1.36e-07	-2.37422	Pex13	peroxisomal membrane protein PEX13 [Source:RefSeq peptide;Acc:NP_001100712]	A
ENSRNOG00000005602	-14.2415	-0.644198	0.0035015	0.011105	-1.56287	Mthfd1	C-1-tetrahydrofolate synthase, cytoplasmicMethylenetetrahydrofolate dehydrogenaseMethenyltetrahydrofolate cyclohydrolaseFormyltetrahydrofolate synthetase [Source:UniProtKB/Swiss-Prot;Acc:P27653]	A
ENSRNOG00000005606	-13.095	0.538148	0.0138475	0.0394749	1.45211	Med1	mediator of RNA polymerase II transcription subunit 1 [Source:RefSeq peptide;Acc:NP_001127833]	E
ENSRNOG00000005607	-14.6589	0.950215	2.08e-05	9.06e-05	1.93216	Kctd5	BTB/POZ domain-containing protein KCTD5 [Source:UniProtKB/Swiss-Prot;Acc:B5DEL1]	E
ENSRNOG00000005608	-20.9861	5.51946	4.18e-26	7.21e-25	45.8692	Tead4	TEA domain family member 4 Gene [Source:MGI Symbol;Acc:MGI:106907]	E
ENSRNOG00000005609	-19.6466	5.36268	1.06e-41	3.45e-40	41.1461	Neurod1	Neurogenic differentiation factor 1 [Source:UniProtKB/Swiss-Prot;Acc:Q64289]	E
ENSRNOG00000005610	-14.3927	-2.17177	2.84e-21	3.87e-20	-4.50575	Yipf4	Protein YIPF4 [Source:UniProtKB/Swiss-Prot;Acc:Q5M7T4]	A
ENSRNOG00000005614	-12.9233	-0.733189	0.000806203	0.00282896	-1.66231	Txn2	Thioredoxin, mitochondrial [Source:UniProtKB/Swiss-Prot;Acc:P97615]	A
ENSRNOG00000005616	-13.6259	-0.573016	0.00897254	0.0264713	-1.48763	Ncoa3	Nuclear receptor coactivator 3 [Source:UniProtKB/Swiss-Prot;Acc:Q9EPU2]	A
ENSRNOG00000005618	-15.5369	-0.82947	0.000241235	0.000914646	-1.77703	Fmc1	UPF0562 protein C7orf55 homolog [Source:UniProtKB/Swiss-Prot;Acc:Q4G012]	A
ENSRNOG00000005620	-17.9822	1.56592	5.3e-09	3.31e-08	2.96066	Lcp2	lymphocyte cytosolic protein 2 [Source:RefSeq peptide;Acc:NP_569105]	E
ENSRNOG00000005621	-20.9638	8.73643	2.24e-56	1.31e-54	426.509	LOC100365223	Uncharacterized protein [Source:UniProtKB/TrEMBL;Acc:D4A275]	E
ENSRNOG00000005623	-13.2944	-1.04789	1.99e-06	9.73e-06	-2.0675	Ankmy2	ankyrin repeat and MYND domain containing 2 [Source:RefSeq peptide;Acc:NP_001101489]	A
ENSRNOG00000005629	-23.1234	4.41713	1.51e-06	7.49e-06	21.3643	LOC690830	Uncharacterized protein [Source:UniProtKB/TrEMBL;Acc:D4A273]	E
ENSRNOG00000005630	-17.1797	-0.896538	0.000218428	0.00083375	-1.86159	D4A269_RAT	Uncharacterized protein [Source:UniProtKB/TrEMBL;Acc:D4A269]	A
ENSRNOG00000005632	-14.3058	3.00309	1.69e-36	4.46e-35	8.01717	Pdzrn3	E3 ubiquitin-protein ligase PDZRN3 [Source:UniProtKB/Swiss-Prot;Acc:P68907]	E
ENSRNOG00000005641	-15.0033	-2.38531	1.3e-24	2.09e-23	-5.22456	B1WBR8_RAT	F-box/LRR-repeat protein 4 [Source:RefSeq peptide;Acc:NP_001101389]	A
ENSRNOG00000005650	-17.9079	-0.902364	0.000466916	0.00169887	-1.86913	Pgf	Placenta growth factor [Source:UniProtKB/Swiss-Prot;Acc:Q63434]	A
ENSRNOG00000005652	-17.5983	3.00016	7.65e-28	1.41e-26	8.0009	Cntn4	Contactin-4 [Source:UniProtKB/Swiss-Prot;Acc:Q62845]	E
ENSRNOG00000005659	-16.9662	5.2837	2.12e-73	2.51e-71	38.9539	Aurkb	Serine/threonine-protein kinase 12 [Source:UniProtKB/Swiss-Prot;Acc:O55099]	E
ENSRNOG00000005665	-18.8853	-0.877208	0.00284661	0.00913809	-1.83682	None		A
ENSRNOG00000005667	-17.5248	4.31835	3.87e-51	1.8e-49	19.9505	Astn1	astrotactin 1 [Source:RefSeq peptide;Acc:NP_001164074]	E
ENSRNOG00000005668	-14.1724	-1.09709	7.68e-07	3.92e-06	-2.13922	Ndufa8	NADH dehydrogenase [Source:RefSeq peptide;Acc:NP_001041327]	A
ENSRNOG00000005669	-18.7396	6.26968	3.12e-67	2.77e-65	77.1545	Car8	Carbonic anhydrase-related protein [Source:UniProtKB/Swiss-Prot;Acc:Q5PPN4]	E
ENSRNOG00000005670	-34.3578	31.3165	4.57e-24	7.12e-23	2.67435e+09	Art4	ecto-ADP-ribosyltransferase 4 [Source:RefSeq peptide;Acc:NP_001166980]	E
ENSRNOG00000005673	-18.5806	5.33133	1.38e-55	7.75e-54	40.2615	Runx1t1	protein CBFA2T1 [Source:RefSeq peptide;Acc:NP_001102127]	E
ENSRNOG00000005678	-12.8889	3.03094	6.05e-38	1.69e-36	8.17341	D3ZIX0_RAT	Laminin, beta 1 (Predicted)Uncharacterized protein [Source:UniProtKB/TrEMBL;Acc:D3ZIX0]	E
ENSRNOG00000005679	-20.7338	4.55053	2.16e-21	2.95e-20	23.434	Fap	seprase [Source:RefSeq peptide;Acc:NP_620205]	E
ENSRNOG00000005686	-12.1513	-1.8934	3.2e-17	3.52e-16	-3.71509	Suclg2	succinyl-CoA ligase [Source:RefSeq peptide;Acc:NP_001094220]	A
ENSRNOG00000005695	-16.4229	-3.70363	1.32e-47	5.35e-46	-13.0288	Mgp	Matrix Gla protein [Source:UniProtKB/Swiss-Prot;Acc:P08494]	A
ENSRNOG00000005697	-20.1113	-2.32714	4.05e-10	2.78e-09	-5.0181	Slc6a11	Sodium- and chloride-dependent GABA transporter 3 [Source:UniProtKB/Swiss-Prot;Acc:P31647]	A
ENSRNOG00000005698	-13.5058	-1.43425	1.16e-10	8.32e-10	-2.70241	Ndufa5	NADH dehydrogenase [ubiquinone] 1 alpha subcomplex subunit 5 [Source:UniProtKB/Swiss-Prot;Acc:Q63362]	A
ENSRNOG00000005700	-14.7937	2.37621	2.41e-24	3.8e-23	5.19172	Nsg1	Neuron-specific protein family member 1 [Source:UniProtKB/Swiss-Prot;Acc:P02683]	E
ENSRNOG00000005703	-12.7087	-0.744608	0.000660205	0.00235287	-1.67552	Arfgef1	ADP-ribosylation factor guanine nucleotide-exchange factor 1(Brefeldin A-inhibited) (Predicted), isoform CRA_aUncharacterized protein [Source:UniProtKB/TrEMBL;Acc:D4A631]	A
ENSRNOG00000005707	-19.5008	3.49163	2.83e-22	4.03e-21	11.2483	Bfsp1	Filensin [Source:UniProtKB/Swiss-Prot;Acc:Q02435]	E
ENSRNOG00000005708	-17.0689	5.13218	2.01e-69	1.99e-67	35.0704	MMP16_RAT	Matrix metalloproteinase-16 [Source:UniProtKB/Swiss-Prot;Acc:O35548]	E
ENSRNOG00000005711	-15.5238	2.85733	4.26e-32	9.51e-31	7.24672	Q62990_RAT	Protein tyrosine phosphatase delta [Source:UniProtKB/TrEMBL;Acc:Q62990]	E
ENSRNOG00000005715	-14.1939	-1.05855	1.83e-06	8.97e-06	-2.08283	Lgr4	Leucine-rich repeat-containing G-protein coupled receptor 4 [Source:UniProtKB/Swiss-Prot;Acc:Q9Z2H4]	A
ENSRNOG00000005719	-13.2426	-2.24139	8.04e-23	1.17e-21	-4.72854	Tmem85	transmembrane protein 85 [Source:RefSeq peptide;Acc:NP_001099965]	A
ENSRNOG00000005720	-22.8065	5.05164	3.88e-09	2.45e-08	33.1662	Spic	transcription factor Spi-C [Source:RefSeq peptide;Acc:NP_001101550]	E
ENSRNOG00000005726	-17.5577	-0.649004	0.00964876	0.0281983	-1.56808	Pclo	Protein piccolo [Source:UniProtKB/Swiss-Prot;Acc:Q9JKS6]	A
ENSRNOG00000005727	-18.6218	4.37633	6.84e-41	2.16e-39	20.7686	Galnt3	polypeptide N-acetylgalactosaminyltransferase 3 [Source:RefSeq peptide;Acc:NP_001015032]	E
ENSRNOG00000005729	-21.8963	2.23691	0.000289751	0.00108561	4.71385	D4A1J3_RAT	Uncharacterized protein [Source:UniProtKB/TrEMBL;Acc:D4A1J3]	E
ENSRNOG00000005730	-14.0873	-2.38283	4.71e-25	7.75e-24	-5.21558	LOC366300	Uncharacterized protein [Source:UniProtKB/TrEMBL;Acc:D3ZPI9]	A
ENSRNOG00000005731	-18.4386	-1.24884	5.86e-06	2.73e-05	-2.3765	Birc3-m1Mcwi-	baculoviral IAP repeat-containing protein 3 [Source:RefSeq peptide;Acc:NP_076477]	A
ENSRNOG00000005739	-14.8699	0.988337	1.05e-05	4.75e-05	1.9839	Asap1	Arf-GAP with SH3 domain, ANK repeat and PH domain-containing protein 1 [Source:UniProtKB/Swiss-Prot;Acc:Q1AAU6]	E
ENSRNOG00000005747	-20.5674	-1.13127	0.00746612	0.0223241	-2.19052	Il27ra	interleukin-27 receptor subunit alpha [Source:RefSeq peptide;Acc:NP_001099413]	A
ENSRNOG00000005749	-18.1613	1.22355	6.1e-06	2.84e-05	2.3352	Foxred2	FAD-dependent oxidoreductase domain-containing protein 2 [Source:RefSeq peptide;Acc:NP_001178716]	E
ENSRNOG00000005753	-15.7054	-1.16624	3.27e-07	1.73e-06	-2.24425	Alg13	UDP-N-acetylglucosamine transferase subunit ALG13 homolog [Source:UniProtKB/Swiss-Prot;Acc:Q5I0K7]	A
ENSRNOG00000005758	-13.4403	-2.35275	9.63e-25	1.55e-23	-5.10797	D4AC89_RAT	Uncharacterized protein [Source:UniProtKB/TrEMBL;Acc:D3Z9Y5]	A
ENSRNOG00000005762	-15.1046	-0.548806	0.013881	0.039559	-1.46287	Rab22a	ras-related protein Rab-22A [Source:RefSeq peptide;Acc:NP_001102436]	A
ENSRNOG00000005763	-12.4477	-1.14947	1.76e-07	9.57e-07	-2.21832	Arl1	ADP-ribosylation factor-like protein 1 [Source:UniProtKB/Swiss-Prot;Acc:P61212]	A
ENSRNOG00000005765	-16.4152	-0.932498	6.34e-05	0.000259957	-1.90858	Ap4s1	adaptor-related protein complex AP-4, sigma 1 [Source:RefSeq peptide;Acc:NP_001124471]	A
ENSRNOG00000005767	-16.0588	0.548429	0.0170397	0.0476894	1.46249	Tulp3		E
ENSRNOG00000005770	-9.65562	-3.79262	2.22e-55	1.23e-53	-13.8578	Sostdc1	Sclerostin domain-containing protein 1 [Source:UniProtKB/Swiss-Prot;Acc:Q642G2]	A
ENSRNOG00000005772	-16.0102	-1.34214	6.21e-09	3.86e-08	-2.53528	Ptplad2	protein tyrosine phosphatase-like protein PTPLAD2 [Source:RefSeq peptide;Acc:NP_001102139]	A
ENSRNOG00000005776	-18.7827	5.93524	8.38e-62	6.08e-60	61.1908	Bcl11b	B-cell lymphoma/leukemia 11B [Source:RefSeq peptide;Acc:NP_001101527]	E
ENSRNOG00000005780	-19.5273	-1.99217	1.26e-09	8.32e-09	-3.97836	D4A0T9_RAT	Uncharacterized protein [Source:UniProtKB/TrEMBL;Acc:D4A0T9]	A
ENSRNOG00000005781	-20.9022	1.95261	3.22e-05	0.000136836	3.87073	Wnt16	protein Wnt-16 [Source:RefSeq peptide;Acc:NP_001102693]	E
ENSRNOG00000005788	-15.4947	0.976855	1.74e-05	7.65e-05	1.96817	D3ZEZ5_RAT	CDK5 regulatory subunit-associated protein 2 [Source:RefSeq peptide;Acc:NP_775157]	E
ENSRNOG00000005795	-14.3408	-0.745784	0.000747685	0.00263554	-1.67688	Aasdhppt	L-aminoadipate-semialdehyde dehydrogenase-phosphopantetheinyl transferase [Source:UniProtKB/Swiss-Prot;Acc:B2RYJ4]	A
ENSRNOG00000005797	-19.3954	0.951055	0.00380267	0.0119841	1.93329	Sla	Src-like-adapter [Source:UniProtKB/Swiss-Prot;Acc:P59622]	E
ENSRNOG00000005798	-15.4469	-1.50202	4.68e-11	3.44e-10	-2.83239	Cav3	Caveolin-3 [Source:UniProtKB/Swiss-Prot;Acc:P51638]	A
ENSRNOG00000005804	-13.3244	1.02536	3.35e-06	1.6e-05	2.03547	Eif3d	Eukaryotic translation initiation factor 3 subunit D [Source:UniProtKB/Swiss-Prot;Acc:Q6AYK8]	E
ENSRNOG00000005807	-20.1587	1.86308	1.78e-06	8.76e-06	3.63784	Ptpn7	Tyrosine-protein phosphatase non-receptor type 7 [Source:UniProtKB/Swiss-Prot;Acc:P49445]	E
ENSRNOG00000005809	-16.5288	1.49467	4.24e-10	2.9e-09	2.81799	Arhgdib	rho GDP-dissociation inhibitor 2 [Source:RefSeq peptide;Acc:NP_001009600]	E
ENSRNOG00000005810	-20.2171	1.19583	0.00245397	0.00798813	2.29076	D3ZA97_RAT	Caspase recruitment domain family, member 12 (Predicted), isoform CRA_bUncharacterized protein [Source:UniProtKB/TrEMBL;Acc:D3ZA97]	E
ENSRNOG00000005811	-23.4387	-3.38785	0.00146951	0.00494284	-10.4676	LOC689955	None	A
ENSRNOG00000005814	-14.5515	-0.916761	3.75e-05	0.000158102	-1.88787	LOC691543	Putative uncharacterized protein LOC691543RCG27010 [Source:UniProtKB/TrEMBL;Acc:B1WBZ9]	A
ENSRNOG00000005818	-18.5084	1.06807	0.000134561	0.000530169	2.09663	RGD1563349	similar to RIKEN cDNA 9330182L06 (RGD1563349), mRNA [Source:RefSeq DNA;Acc:NM_001109345]	E
ENSRNOG00000005821	-18.0513	-1.93909	3.14e-13	2.69e-12	-3.83465	RGD1306484	Uncharacterized protein [Source:UniProtKB/TrEMBL;Acc:D3ZM02]	A
ENSRNOG00000005823	-14.2914	0.671306	0.00242319	0.0078949	1.59251	Utp20	small subunit processome component 20 homolog [Source:RefSeq peptide;Acc:NP_001178708]	E
ENSRNOG00000005825	-16.345	-5.51358	1.15e-86	2.36e-84	-45.6829	Lyz2	Lysozyme C-1 [Source:UniProtKB/Swiss-Prot;Acc:P00697]	A
ENSRNOG00000005826	-18.4148	1.36513	1.31e-06	6.53e-06	2.576	RGD1562420		E
ENSRNOG00000005828	-10.4923	-1.23579	1.87e-08	1.11e-07	-2.35511	Skp1	S-phase kinase-associated protein 1 [Source:UniProtKB/Swiss-Prot;Acc:Q6PEC4]	A
ENSRNOG00000005835	-15.6581	1.54985	2.23e-11	1.68e-10	2.92786	None	None	E
ENSRNOG00000005836	-18.4513	2.2452	1.67e-14	1.55e-13	4.74103	Fam49a	family with sequence similarity 49, member A [Source:RefSeq peptide;Acc:NP_001100188]	E
ENSRNOG00000005841	-12.9845	-1.11792	3.92e-07	2.06e-06	-2.17034	Erp44	endoplasmic reticulum resident protein 44 [Source:RefSeq peptide;Acc:NP_001008318]	A
ENSRNOG00000005849	-12.9816	-0.611311	0.00514655	0.0157905	-1.52765	Aco1	Cytoplasmic aconitate hydratase [Source:UniProtKB/Swiss-Prot;Acc:Q63270]	A
ENSRNOG00000005851	-13.1743	-0.84986	0.000107742	0.000429496	-1.80233	Tmf1	TATA element modulatory factor 1 [Source:RefSeq peptide;Acc:NP_446123]	A
ENSRNOG00000005854	-17.1555	0.664993	0.00661422	0.0199489	1.58556	Angpt1	Angiopoietin-1 [Source:UniProtKB/Swiss-Prot;Acc:O35460]	E
ENSRNOG00000005856	-14.8984	-1.41353	3.64e-10	2.51e-09	-2.66388	Slc30a6	zinc transporter 6 [Source:RefSeq peptide;Acc:NP_001100178]	A
ENSRNOG00000005861	-20.0068	-3.6034	3.48e-22	4.93e-21	-12.1543	Hsd11b1	Corticosteroid 11-beta-dehydrogenase isozyme 1 [Source:UniProtKB/Swiss-Prot;Acc:P16232]	A
ENSRNOG00000005864	-19.0267	-1.0513	0.000416991	0.00152721	-2.07239	LOC362131	None	A
ENSRNOG00000005865	-13.2742	-2.73734	5.07e-32	1.13e-30	-6.6684	Ssfa2	sperm specific antigen 2 [Source:RefSeq peptide;Acc:NP_001101208]	A
ENSRNOG00000005867	-18.9129	0.837369	0.00625397	0.0189224	1.78679	None	transformer 2 beta homolog (Drosophila) Gene [Source:MGI Symbol;Acc:MGI:106016]	E
ENSRNOG00000005871	-22.4878	-2.64408	0.000368745	0.00135776	-6.25095	Il1rn	Interleukin-1 receptor antagonist protein [Source:UniProtKB/Swiss-Prot;Acc:P25086]	A
ENSRNOG00000005872	-17.5497	3.65686	7.84e-39	2.28e-37	12.6132	Tcf7	Transcription factor 7, T-cell specific (Predicted), isoform CRA_bUncharacterized protein [Source:UniProtKB/TrEMBL;Acc:D3ZLD0]	E
ENSRNOG00000005874	-20.1626	2.34715	3.76e-09	2.38e-08	5.08818	Tle2	transducin-like enhancer protein 2 [Source:RefSeq peptide;Acc:NP_001034102]	E
ENSRNOG00000005877	-12.0717	-0.543129	0.0126195	0.0361771	-1.45713	LPPRC_RAT	Leucine-rich PPR motif-containing protein, mitochondrial [Source:UniProtKB/Swiss-Prot;Acc:Q5SGE0]	A
ENSRNOG00000005882	-14.0713	2.41408	1.94e-25	3.24e-24	5.3298	Tle1	transducin-like enhancer of split 1 [Source:RefSeq peptide;Acc:NP_001166904]	E
ENSRNOG00000005884	-13.0879	-2.198	4.23e-22	5.98e-21	-4.58841	D3ZQL1_RAT	Putative uncharacterized protein RGD1305045_predictedUncharacterized protein [Source:UniProtKB/TrEMBL;Acc:D3ZQL1]	A
ENSRNOG00000005888	-15.9677	1.64178	2.69e-12	2.17e-11	3.1205	Fsip1	Fibrous sheath-interacting protein 1 [Source:UniProtKB/Swiss-Prot;Acc:Q66H16]	E
ENSRNOG00000005890	-11.7671	0.611208	0.00501032	0.0153966	1.52754	PAIRB_RAT	Plasminogen activator inhibitor 1 RNA-binding protein [Source:UniProtKB/Swiss-Prot;Acc:Q6AXS5]	E
ENSRNOG00000005894	-20.8099	1.43945	0.00133679	0.00452905	2.71217	Odz1	odd Oz/ten-m homolog 1 (Drosophila) Gene [Source:MGI Symbol;Acc:MGI:1345185]	E
ENSRNOG00000005903	-16.9876	-0.724115	0.00246292	0.00801462	-1.65189	St14	matriptase [Source:RefSeq peptide;Acc:NP_446087]	A
ENSRNOG00000005905	-19.3743	3.4179	2.41e-22	3.44e-21	10.6878	Pde4b	cAMP-specific 3',5'-cyclic phosphodiesterase 4B [Source:UniProtKB/Swiss-Prot;Acc:P14646]	E
ENSRNOG00000005906	-22.2806	2.10778	0.00458275	0.014237	4.31027	LOC100365047	Platelet glycoprotein 4 [Source:UniProtKB/Swiss-Prot;Acc:Q07969]	E
ENSRNOG00000005907	-16.2025	0.835478	0.000314803	0.00117618	1.78445	Rad18	E3 ubiquitin-protein ligase RAD18 [Source:RefSeq peptide;Acc:NP_001071141]	E
ENSRNOG00000005911	-21.5351	1.59313	0.00663064	0.0199902	3.01704	Rln3	Relaxin-3Relaxin-3 B chainRelaxin-3 A chain [Source:UniProtKB/Swiss-Prot;Acc:Q8BFS3]	E
[truncated: 8,654 more rows]
